# Supplementary material
Source: ML conference proceedings conference paper supplement (https://proceedings.neurips.cc/paper_files/paper/2022/hash/867c06823281e506e8059f5c13a57f75-Abstract.html)
Supplement: Supplementary file 1 [file 867c06823281e506e8059f5c13a57f75-Supplemental-Conference.zip]

Archive with 77 entries (71 files):
- SupplementaryMaterial/
- __MACOSX/._SupplementaryMaterial
- SupplementaryMaterial/.DS_Store
- __MACOSX/SupplementaryMaterial/._.DS_Store
- SupplementaryMaterial/APPENDIX - Concept Embedding Models.pdf
- __MACOSX/SupplementaryMaterial/._APPENDIX - Concept Embedding Models.pdf
- SupplementaryMaterial/code/
- SupplementaryMaterial/code/.DS_Store
- __MACOSX/SupplementaryMaterial/code/._.DS_Store
- SupplementaryMaterial/code/core/
- SupplementaryMaterial/code/mutual_information/
- __MACOSX/SupplementaryMaterial/code/._mutual_information
- SupplementaryMaterial/code/core/.DS_Store
- __MACOSX/SupplementaryMaterial/code/core/._.DS_Store
- SupplementaryMaterial/code/core/cub_randint_ablation.py
- __MACOSX/SupplementaryMaterial/code/core/._cub_randint_ablation.py
- SupplementaryMaterial/code/core/models.py
- __MACOSX/SupplementaryMaterial/code/core/._models.py
- SupplementaryMaterial/code/core/cub_representation_use.ipynb
- __MACOSX/SupplementaryMaterial/code/core/._cub_representation_use.ipynb
- SupplementaryMaterial/code/core/results_plots.ipynb
- __MACOSX/SupplementaryMaterial/code/core/._results_plots.ipynb
- SupplementaryMaterial/code/core/celeba_emb_size_ablation.py
- __MACOSX/SupplementaryMaterial/code/core/._celeba_emb_size_ablation.py
- SupplementaryMaterial/code/core/celeba_intervention_experiments.ipynb
- __MACOSX/SupplementaryMaterial/code/core/._celeba_intervention_experiments.ipynb
- SupplementaryMaterial/code/core/homogeneity.py
- __MACOSX/SupplementaryMaterial/code/core/._homogeneity.py
- SupplementaryMaterial/code/core/utils.py
- SupplementaryMaterial/code/core/synthetic_datasets_experiments.py
- __MACOSX/SupplementaryMaterial/code/core/._synthetic_datasets_experiments.py
- SupplementaryMaterial/code/core/CUB200/
- SupplementaryMaterial/code/core/cub_subsample_experiment.py
- __MACOSX/SupplementaryMaterial/code/core/._cub_subsample_experiment.py
- SupplementaryMaterial/code/core/cub_qualitative_results.ipynb
- __MACOSX/SupplementaryMaterial/code/core/._cub_qualitative_results.ipynb
- SupplementaryMaterial/code/core/CAS_plots.ipynb
- __MACOSX/SupplementaryMaterial/code/core/._CAS_plots.ipynb
- SupplementaryMaterial/code/core/cub_emb_size_ablation.py
- __MACOSX/SupplementaryMaterial/code/core/._cub_emb_size_ablation.py
- SupplementaryMaterial/code/core/celeba_experiments.py
- __MACOSX/SupplementaryMaterial/code/core/._celeba_experiments.py
- SupplementaryMaterial/code/core/cub_intervention_experiments.ipynb
- __MACOSX/SupplementaryMaterial/code/core/._cub_intervention_experiments.ipynb
- SupplementaryMaterial/code/core/training.py
- SupplementaryMaterial/code/core/cub_experiments.py
- __MACOSX/SupplementaryMaterial/code/core/._cub_experiments.py
- SupplementaryMaterial/code/mutual_information/plot_results.ipynb
- __MACOSX/SupplementaryMaterial/code/mutual_information/._plot_results.ipynb
- SupplementaryMaterial/code/mutual_information/mutual_information.py
- __MACOSX/SupplementaryMaterial/code/mutual_information/._mutual_information.py
- SupplementaryMaterial/code/mutual_information/xor_analysis.ipynb
- __MACOSX/SupplementaryMaterial/code/mutual_information/._xor_analysis.ipynb
- SupplementaryMaterial/code/mutual_information/utils_cv.py
- __MACOSX/SupplementaryMaterial/code/mutual_information/._utils_cv.py
- SupplementaryMaterial/code/mutual_information/cub_analysis.ipynb
- __MACOSX/SupplementaryMaterial/code/mutual_information/._cub_analysis.ipynb
- SupplementaryMaterial/code/mutual_information/trig_analysis.ipynb
- __MACOSX/SupplementaryMaterial/code/mutual_information/._trig_analysis.ipynb
- SupplementaryMaterial/code/mutual_information/utils.py
- __MACOSX/SupplementaryMaterial/code/mutual_information/._utils.py
- SupplementaryMaterial/code/mutual_information/celeba_analysis.ipynb
- __MACOSX/SupplementaryMaterial/code/mutual_information/._celeba_analysis.ipynb
- SupplementaryMaterial/code/mutual_information/dot_analysis.ipynb
- __MACOSX/SupplementaryMaterial/code/mutual_information/._dot_analysis.ipynb
- SupplementaryMaterial/code/core/CUB200/.DS_Store
- __MACOSX/SupplementaryMaterial/code/core/CUB200/._.DS_Store
- SupplementaryMaterial/code/core/CUB200/data_processing.py
- SupplementaryMaterial/code/core/CUB200/class_attr_data_10/
- __MACOSX/SupplementaryMaterial/code/core/CUB200/._class_attr_data_10
- SupplementaryMaterial/code/core/CUB200/cub_loader.py
- SupplementaryMaterial/code/core/CUB200/class_attr_data_10/train.pkl
- __MACOSX/SupplementaryMaterial/code/core/CUB200/class_attr_data_10/._train.pkl
- SupplementaryMaterial/code/core/CUB200/class_attr_data_10/val.pkl
- __MACOSX/SupplementaryMaterial/code/core/CUB200/class_attr_data_10/._val.pkl
- SupplementaryMaterial/code/core/CUB200/class_attr_data_10/test.pkl
- __MACOSX/SupplementaryMaterial/code/core/CUB200/class_attr_data_10/._test.pkl
