# Supplementary material
Source: ML conference proceedings conference paper supplement (https://proceedings.neurips.cc/paper_files/paper/2022/hash/867c06823281e506e8059f5c13a57f75-Abstract.html)
Supplement: Supplementary file 1 [file 867c06823281e506e8059f5c13a57f75-Supplemental-Conference.zip › SupplementaryMaterial/code/core/CAS_plots.ipynb]

# %% [code]
import copy
import joblib
import os
import glob
import numpy as np
import pandas as pd
import torch
import matplotlib.pyplot as plt
from matplotlib import patches
import seaborn as sns
from sklearn.model_selection import cross_val_score
from sklearn.tree import DecisionTreeClassifier
from sklearn.ensemble import RandomForestClassifier
from sklearn.metrics import accuracy_score, roc_curve, f1_score
from sklearn.manifold import TSNE
from torch.nn import BCELoss, BCEWithLogitsLoss, Sequential, LeakyReLU, Linear
from torch.utils.data import DataLoader, TensorDataset
from sklearn.cluster import KMeans
from sklearn_extra.cluster import KMedoids
from sklearn.model_selection import GridSearchCV
from scipy.spatial.distance import cdist
from sklearn.metrics.cluster import homogeneity_score, v_measure_score
from matplotlib import rc
from sklearn.neighbors import KNeighborsClassifier

cv = 3
emb_sizes = [2, 10, 50]
sns.set(font_scale=1.3)
sns.set_style('whitegrid')
figsize = [9, 4]
palette = [sns.color_palette("Paired")[i] for i in [7, 6, 3, 2, 5]]
step = 500
LATEX_SYMBOL = "$"
rc('text', usetex=(LATEX_SYMBOL == "$"))
plt.style.use('seaborn-whitegrid')

experiments = {
    'XOR': 'results/xor/test_embedding_acts/',
    'Trigonometry': 'results/trig/test_embedding_acts/',
    'Dot': 'results/dot/test_embedding_acts/',
    'CUB': 'results/cub/test_embedding_acts/',
    'CelebA': 'results/celeba/test_embedding_acts/',
}
methods = {
    'ConceptBottleneckModelNoConceptSupervisionReLU_ExtraCapacity': 'VanillaModel',
    'ConceptBottleneckModelBool': 'Bool',
    'ConceptBottleneckModelFuzzy': 'Fuzzy', 
    'ConceptBottleneckModelFuzzyExtraCapacity': 'Fuzzy+',
    'MixtureEmbModelSharedProb_Adaptive_NoProbConcat': 'CEM without RandInt (ours)',
    'MixtureEmbModelSharedProb_AdaptiveDropout_NoProbConcat': 'CEM (ours)',
}

# %% [code]
def embedding_homogeneity(c_vec: np.array, c_test: np.array, y_test: np.array, nc: int, c_pred=None) -> [float, float]:
    """
    Computes the alignment between learnt concepts and labels.

    :param c_vec: predicted concept representations (can be concept embeddings)
    :param c_test: concept ground truth labels
    :param y_test: task ground truth labels
    :param step: integration step
    :return: concept alignment AUC, task alignment AUC
    """
    # compute the maximum value for the AUC
    n_clusters = np.linspace(2, c_vec.shape[0], step).astype(int)
    max_auc = np.trapz(np.ones(nc))
    

    # for each concept:
    #   1. find clusters
    #   2. compare cluster assignments with ground truth concept/task labels
    concept_auc, task_auc = [], []
    for concept_id in range(c_test.shape[1]):
        concept_homogeneity, task_homogeneity = [], []
        for nc in n_clusters:
            kmedoids = KMedoids(n_clusters=nc, random_state=0)
            if c_vec.shape[1] != c_test.shape[1]:
                c_cluster_labels = kmedoids.fit_predict(np.hstack([c_vec[:, concept_id][:, np.newaxis], c_vec[:, c_test.shape[1]:]]))
            elif c_vec.shape[1] == c_test.shape[1] and len(c_vec.shape) == 2:
                c_cluster_labels = kmedoids.fit_predict(c_vec[:, concept_id].reshape(-1, 1))
            else:
                c_cluster_labels = kmedoids.fit_predict(c_vec[:, concept_id])

            # compute alignment with ground truth labels
            concept_homogeneity.append(homogeneity_score(c_test[:, concept_id], c_cluster_labels))
            task_homogeneity.append(homogeneity_score(y_test, c_cluster_labels))

        # compute the area under the curve
        concept_auc.append(np.trapz(np.array(concept_homogeneity)) / max_auc)
        task_auc.append(np.trapz(np.array(task_homogeneity)) / max_auc)

    # return the average alignment across all concepts
    concept_auc = np.mean(concept_auc)
    task_auc = np.mean(task_auc)
    return concept_auc, task_auc

# %% [code]
auc_file = os.path.join('./results', 'homogeneity_summary.csv')
if os.path.exists(auc_file):
    auc_scores = pd.read_csv(auc_file)

else:
    columns = ['experiment', 'concept AUC (%)', 'task AUC (%)', 'method_id', 'method', 'fold']
    auc_scores = pd.DataFrame(columns=columns)
    
for experiment_name, result_dir in experiments.items():
    c_test = np.load(os.path.join(result_dir, 'c_val.npy'))
    y_test = np.load(os.path.join(result_dir, 'y_val.npy'))
    resnet = '_lambda'
    cv = 5
    epochs = 500
    step = 20
    if experiment_name == 'CUB':
        resnet = '_resnet34'
        epochs = 300
        step = 10
    elif experiment_name == 'CUB*':
        resnet = '_subsample_0.05_resnet34'
        epochs = 250
        cv = 3
    elif experiment_name == 'CelebA':
        resnet = '_resnet34'
        epochs = 200
        step = 10

    for method_id, (method, method_name) in enumerate(methods.items()):
        for fold in range(cv):
            if method_name == 'Fuzzy+' and experiment_name in ['CelebA', 'CUB']:
                resnet = '_Logit_resnet34'
            elif method_name == 'Fuzzy+' and experiment_name not in ['CelebA', 'CUB']:
                resnet = '_LogitOnlyProb_lambda'
            elif method_name != 'Fuzzy+' and experiment_name in ['CelebA', 'CUB']:
                resnet = '_resnet34'
            else:
                resnet = '_lambda'

            c_pred = np.load(os.path.join(result_dir, f'{method}{resnet}_fold_{fold+1}', f'test_embedding_semantics_on_epoch_{epochs}.npy'))
            c_vec = np.load(os.path.join(result_dir, f'{method}{resnet}_fold_{fold+1}', f'test_embedding_vectors_on_epoch_{epochs}.npy'))
            y_pred = np.load(os.path.join(result_dir, f'{method}{resnet}_fold_{fold+1}', f'test_model_output_on_epoch_{epochs}.npy'))

            if experiment_name == 'CUB*':
                c_test = np.load(os.path.join(result_dir, 'c_test.npy'))
                selected_concepts = np.load(os.path.join(result_dir, f'selected_concepts_fold_{fold+1}.npy'))
                c_test = c_test[:, selected_concepts]

            if 'CEM' in method_name:
                c_vec = c_vec.reshape(c_test.shape[0], c_test.shape[1], -1)

            is_done = len(auc_scores[(auc_scores['experiment']==experiment_name) & 
                            (auc_scores['method_id']==method_id) & 
                            (auc_scores['method']==method_name) & 
                            (auc_scores['fold']==fold)])
            if is_done < 1:
                concept_auc, task_auc = embedding_homogeneity(c_vec, c_test, y_test, step)
                auc_scores = auc_scores.append(pd.DataFrame([[experiment_name, concept_auc*100, task_auc*100, method_id, method_name, fold]], columns=columns))
                auc_scores.to_csv(os.path.join('./results', 'homogeneity_summary.csv'), index=False)

# %% [code]
def bold_text(x):
    if LATEX_SYMBOL == "$":
        return r"$\textbf{" + x + "}$"
    return x

clrs = sns.color_palette("colorblind", 30)
color_map = {
    'VanillaModel': clrs[7],
    'Bool': clrs[2],
    'Fuzzy': clrs[5], 
    'Fuzzy+': clrs[6],
    'CEM without RandInt (ours)': clrs[9],
    'CEM (ours)': clrs[10],
}
fig_width = 18
fig_height = 3.5
scale = 1
trials = 5
num_models = len(methods)

fig, axs = plt.subplots(1, 5, figsize=(fig_width, fig_height))
for j, (experiment_name, _) in enumerate(experiments.items()):
    ax = axs[j]
    mean = auc_scores.groupby(['experiment', 'method']).mean().reset_index()
    std = auc_scores.groupby(['experiment', 'method']).std().reset_index()
    i = 0
    for _, method_name in methods.items():
        if method_name == 'VanillaModel+':
            continue
        alpha = 1
        hatch = ''
        if method_name == 'VanillaModel':
            alpha = 1
            hatch="/"
        color = color_map[method_name]
        ax.bar(
            i,
            mean[(mean['experiment']==experiment_name) & (mean['method']==method_name)]['concept AUC (%)'],
            width=1,
            color=color,
            align='center',
            label=method_name,
            yerr=2*std[(std['experiment']==experiment_name) & (std['method']==method_name)]['concept AUC (%)'],
            capsize=5,
            edgecolor="black",
            alpha=alpha,
            hatch=hatch,
        )
        i += 1
        
    if j == 0:
        ax.set_ylabel("Concept Alignment (%)", fontsize=18)
    ax.set_title(bold_text(experiment_name), fontsize=30)
    ax.set_xticks([])
    ax.set_yticks(np.arange(0, 105, 10))
    ax.set_yticklabels(list(map(lambda x: f"{x}", np.arange(0, 105, 10))), fontsize=15)
    ax.set_ylim((40, 105))
    ax.grid(axis='y')
    ax.grid(True)

handles, labels = ax.get_legend_handles_labels()
labels = ['No concepts',
 'Bool-CBM',
 'Fuzzy-CBM',
 'Hybrid-CBM',
 'CEM without RandInt (ours)',
 'CEM (ours)']

lgd = fig.legend(handles, labels, fontsize=16, loc='upper center', bbox_to_anchor=(0.5,0.11), ncol=num_models)
plt.show()


# %% [code]
acc_scores = pd.DataFrame()
columns = ['experiment', 'Task Accuracy (%)', 'method_id', 'method', 'fold']
for experiment_name, result_dir in experiments.items():
    result_dir = '/'.join(result_dir.split('/')[:-2])
    resnet = ''
    cv = 5
    epochs = 3100
    step = 500
    if experiment_name == 'CUB':
        resnet = '_resnet34'
        epochs = 250
        cv = 5
    elif experiment_name == 'CUB*':
        resnet = '_subsample_0.05_resnet34'
        epochs = 250
        cv = 3
    elif experiment_name == 'CelebA':
        resnet = '_resnet34'
        epochs = 200
        cv = 5
    elif experiment_name == 'XOR':
        epochs = 1035
        step = 50
    
    for method_id, (method, method_name) in enumerate(methods.items()):
        acc_results = joblib.load(os.path.join(result_dir, 'results.joblib'))
        if method_name == 'Fuzzy+' and experiment_name in ['CelebA', 'CUB']:
            resnet = '_Logit'
        elif method_name == 'Fuzzy+' and experiment_name not in ['CelebA', 'CUB']:
            resnet = '_LogitOnlyProb'
        else:
            resnet = ''
                
        for fold in range(cv):
            y_acc = acc_results[str(fold)][f'test_acc_y_{method}{resnet}']
            acc_scores = acc_scores.append(pd.DataFrame([[experiment_name, y_acc*100, method_id, method_name, fold]], columns=columns))

acc_scores.reset_index(inplace=True)

# %% [code]
auc_file = os.path.join('results', 'homogeneity_summary.csv')
if os.path.exists(auc_file):
    auc_scores = pd.read_csv(auc_file)

auc_scores['method'] = auc_scores['method'].astype(str)
acc_scores['method'] = acc_scores['method'].astype(str)
acc_scores = pd.merge(auc_scores, acc_scores, on=['method', 'fold', 'experiment'], how='left', suffixes=('', '_r'))

# %% [code]
acc_scores[acc_scores['experiment']=='CUB']

# %% [code]
from scipy import stats
from scipy.special import inv_boxcox

def ci_interv(r, ci=0.95):
    m = np.mean(r)
    try:
        xt, lmbda = stats.boxcox(r)
        lo_xt, hi_xt = stats.t.interval(ci, len(xt) - 1, loc=np.mean(xt), scale=stats.sem(xt))
        lo_x, hi_x = inv_boxcox(lo_xt, lmbda), inv_boxcox(hi_xt, lmbda)
    except ValueError:
        lo_x = hi_x = m
    if np.isnan(lo_x):
        lo_x = np.mean(r)
    if np.isnan(hi_x):
        hi_x = np.mean(r)
    return np.array([[m-lo_x], [hi_x-m]])
#     return np.array([[lo_x], [hi_x]])

def ci_interv_boot(r, ci=0.95):
    n = 100
    m = np.mean(r)
    xt = [np.mean(np.random.choice(r, len(r))) for _ in range(n)]
    lo_x, hi_x = stats.t.interval(ci, len(xt) - 1, loc=np.mean(xt), scale=stats.sem(xt))
    if np.isnan(lo_x):
        lo_x = hi_x = np.mean(r)
    return np.array([[m-lo_x], [hi_x-m]])

a2 = acc_scores[(acc_scores['experiment']==experiment_name) & (acc_scores['method']==method_name)]['concept AUC (%)'].values

# %% [code]
std = acc_scores.groupby(['experiment', 'method']).std().reset_index()
std

# %% [code]
import matplotlib as mpl
def bold_text(x):
    if LATEX_SYMBOL == "$":
        return r"$\textbf{" + x + "}$"
    return x

# sns.set_style("whitegrid", {"grid.alpha": ".6", "grid.linewidth": ".3"})
plt.style.use('seaborn-whitegrid')#, {"grid.alpha": ".6", "grid.linewidth": ".3"})
mpl.rc('grid', alpha=.7, linewidth=.5)
# mpl.rc('grid', alpha=1, linewidth=2)
clrs = sns.color_palette("colorblind", 30)
color_map = {
    'VanillaModel': clrs[7],
    'Bool': clrs[2],
    'Fuzzy': clrs[5], 
    'Fuzzy+': clrs[6],
    'CEM without RandInt (ours)': clrs[9],
    'CEM (ours)': clrs[10],
}
markers = {
    'VanillaModel': 'o',
    'Bool': 's',
    'Fuzzy': 'X', 
    'Fuzzy+': 'P',
    'CEM without RandInt (ours)': 'D',
    'CEM (ours)': 'D',
}
fig_width = 18
fig_height = 3
scale = 1
trials = 5
num_models = len(methods)

fig, axs = plt.subplots(1, 5, figsize=(fig_width, fig_height))
for j, (experiment_name, _) in enumerate(experiments.items()):
    ax = axs[j]
    labelcolor = []
    for i, (_, method_name) in enumerate(methods.items()):
        
        if method_name == 'CEM (ours)':
            continue

        color = color_map[method_name]
        
        task_vals = acc_scores[(acc_scores['experiment']==experiment_name) & (acc_scores['method']==method_name)]['Task Accuracy (%)'].values
        concept_vals = acc_scores[(acc_scores['experiment']==experiment_name) & (acc_scores['method']==method_name)]['concept AUC (%)'].values
        ci_tasks = ci_interv(task_vals)
        ci_concepts = ci_interv(concept_vals)
        median_tasks = np.mean(task_vals)
        median_concepts = np.mean(concept_vals)

        ax.add_patch(patches.Rectangle((0, 100.2), 110, 110, **{'color': 'white', 'alpha': 1, 'zorder': 0.8}))
        ax.add_patch(patches.Rectangle((100.2, 0), 110, 110, **{'color': 'white', 'alpha': 1, 'zorder': 0.8}))
        ax.errorbar(
            y=median_tasks,
            x=median_concepts,
            elinewidth=2,
            color=color,
            yerr=ci_tasks,
            xerr=ci_concepts,
            capsize=3,
        )
        ax.scatter(
            y=median_tasks,
            x=median_concepts,
            marker=markers[method_name],
            s=80,
            color=color,
            label=method_name,
        )
        labelcolor.append(color)
        
    if j == 0:
        ax.set_ylabel("Task Accuracy (%)", fontsize=18)
        
    ax.set_xlabel("Concept Alignment (%)", fontsize=18)
    ax.set_title(bold_text(experiment_name), fontsize=30)
    if experiment_name == 'CelebA':
        ax.set_xticks(np.arange(0, 101, 5))
        ax.set_yticks(np.arange(0, 101, 5))
        ax.set_xticklabels(list(map(lambda x: f"{x}", np.arange(0, 101, 5))), fontsize=15)
        ax.set_yticklabels(list(map(lambda x: f"{x}", np.arange(0, 101, 5))), fontsize=15)
        ax.set_xlim((66, 85))
        ax.set_ylim((21, 35))
    elif experiment_name == 'CUB':
        ax.set_xticks(np.arange(0, 101, 5))
        ax.set_yticks(np.arange(0, 101, 5))
        ax.set_xticklabels(list(map(lambda x: f"{x}", np.arange(0, 101, 5))), fontsize=15)
        ax.set_yticklabels(list(map(lambda x: f"{x}", np.arange(0, 101, 5))), fontsize=15)
        ax.set_xlim((76, 90))
        ax.set_ylim((61, 85))
    else:
        ax.set_xticks(np.arange(0, 101, 10))
        ax.set_yticks(np.arange(0, 101, 10))
        ax.set_xticklabels(list(map(lambda x: f"{x}", np.arange(0, 101, 10))), fontsize=15)
        ax.set_yticklabels(list(map(lambda x: f"{x}", np.arange(0, 101, 10))), fontsize=15)
        ax.set_xlim((41, 103))
        ax.set_ylim((41, 103))
    ax.grid(axis='y')
    ax.grid(True)
    
    if experiment_name == 'XOR':
        ann_alpha = 0.6
        ax.annotate('CEM', xy=(98, 98), xytext=(85, 80), fontsize=12, alpha=ann_alpha, 
                    arrowprops=dict(arrowstyle="<-", color='black', lw=1, alpha=ann_alpha))
        ax.annotate('Hybrid-CBM', xy=(98, 98), xytext=(50, 80), fontsize=12, alpha=ann_alpha, 
                    arrowprops=dict(arrowstyle="<-", color='black', lw=1, alpha=ann_alpha))
        ax.annotate('Fuzzy-CBM', xy=(99, 52), xytext=(80, 60), fontsize=12, alpha=ann_alpha, 
                    arrowprops=dict(arrowstyle="<-", color='black', lw=1, alpha=ann_alpha))
        ax.annotate('Boolean-CBM', xy=(99, 52), xytext=(47, 60), fontsize=12, alpha=ann_alpha, 
                    arrowprops=dict(arrowstyle="<-", color='black', lw=1, alpha=ann_alpha))

handles, labels = ax.get_legend_handles_labels()
labels = ['No concepts',
 'Boolean-CBM',
 'Fuzzy-CBM',
 'Hybrid-CBM',
 'CEM withput RandInt (ours)',
 'CEM (ours)']

lgd = fig.legend(handles, labels, fontsize=18, loc='upper center', bbox_to_anchor=(0.5,-0.05), ncol=num_models)
plt.show()


# %% [code]
clrs = sns.color_palette("colorblind", 30)
color_map = {
    'VanillaModel': clrs[7],
    'Bool': clrs[2],
    'Fuzzy': clrs[5], 
    'Fuzzy+': clrs[6],
    'CEM without RandInt (ours)': clrs[9],
    'CEM (ours)': clrs[10],
}
markers = {
    'VanillaModel': 'o',
    'Bool': 's',
    'Fuzzy': 'X', 
    'Fuzzy+': 'P',
    'CEM without RandInt (ours)': 'D',
    'CEM (ours)': 'D',
}
fig_width = 4
fig_height = 4
scale = 1
trials = 5
num_models = len(methods)

fig, axs = plt.subplots(1, 1, figsize=(fig_width, fig_height))
for j, (experiment_name, _) in enumerate(experiments.items()):
    ax = axs
    mean = acc_scores.groupby(['experiment', 'method']).mean().reset_index()
    std = acc_scores.groupby(['experiment', 'method']).std().reset_index()
    labelcolor = []
    if experiment_name != 'Dot':
        continue
        
    for i, (_, method_name) in enumerate(methods.items()):
        if method_name == 'CEM (ours)' or method_name == 'Bool':
            continue

        color = color_map[method_name]
        ax.add_patch(patches.Rectangle((0, 100.2), 110, 110, **{'color': 'white', 'alpha': 1, 'zorder': 0.8}))
        ax.add_patch(patches.Rectangle((100.2, 0), 110, 110, **{'color': 'white', 'alpha': 1, 'zorder': 0.8}))
        ax.errorbar(
            y=mean[(mean['experiment']==experiment_name) & (mean['method']==method_name)]['Task Accuracy (%)'],
            x=mean[(mean['experiment']==experiment_name) & (mean['method']==method_name)]['concept AUC (%)'],
            elinewidth=2,
            color=color,
            yerr=2*std[(std['experiment']==experiment_name) & (std['method']==method_name)]['Task Accuracy (%)'],
            xerr=2*std[(std['experiment']==experiment_name) & (std['method']==method_name)]['concept AUC (%)'],
            capsize=3,
        )
        ax.scatter(
            y=mean[(mean['experiment']==experiment_name) & (mean['method']==method_name)]['Task Accuracy (%)'],
            x=mean[(mean['experiment']==experiment_name) & (mean['method']==method_name)]['concept AUC (%)'],
            marker=markers[method_name],
            s=80,
            color=color,
            label=method_name,
        )
        labelcolor.append(color)
        
    ax.set_title(bold_text("Trade-Offs (Dot)"), fontsize=22) #, pad=20
    ax.set_ylabel("Task Accuracy (%)", fontsize=18)    
    ax.set_xlabel("Concept Alignment (%)", fontsize=18)
    ax.set_xticks(np.arange(0, 101, 10))
    ax.set_xticklabels(list(map(lambda x: f"{x}", np.arange(0, 101, 10))), fontsize=15)
    ax.set_yticks(np.arange(0, 101, 10))
    ax.set_yticklabels(list(map(lambda x: f"{x}", np.arange(0, 101, 10))), fontsize=15)
    ax.set_xlim((41, 102))
    ax.set_ylim((41, 102))
    ax.grid(axis='y')
    ax.grid(True)

    
    ax.annotate('OURS', xy=(91, 90), fontsize=11)
    ax.annotate('No concepts', xy=(49, 99), fontsize=9)
    ax.annotate('CBM Fuzzy\n (Koh et al.)', xy=(81, 50), fontsize=9)
    ax.annotate('   CBM Hybrid\n(Manhipei et al.)', xy=(62, 89), fontsize=9)

ax.scatter(
    y=100,
    x=100,
    marker='*',
    s=110,
    color=clrs[3],
)

plt.tight_layout()
plt.show()
