# Supplementary material
Source: ML conference proceedings conference paper supplement (https://proceedings.neurips.cc/paper_files/paper/2022/hash/867c06823281e506e8059f5c13a57f75-Abstract.html)
Supplement: Supplementary file 1 [file 867c06823281e506e8059f5c13a57f75-Supplemental-Conference.zip › SupplementaryMaterial/code/core/celeba_intervention_experiments.ipynb]

# %% [markdown]
# Setup

# %% [code]
%load_ext autoreload
%load_ext tensorboard
%matplotlib inline

# %% [code]
import matplotlib
import numpy as np
import os
import random
import tensorflow as tf
import yaml
import matplotlib.pyplot as plt
import numpy as np
from matplotlib import rc
from matplotlib import cm
import seaborn as sns
from importlib import reload
from pathlib import Path
import sklearn
from tensorflow.keras.models import load_model
from joblib import dump, load
import pandas as pd
import torch
import pytorch_lightning as pl
import torchvision
from torchvision import transforms
from pytorch_lightning import seed_everything
import celeba_experiments as celeba
import models as models


# %% [code]
################################################################################
## Global Variables Defining Experiment Flow
################################################################################


GPU= 1
NUM_WORKERS = 10
LATEX_SYMBOL = "$"
RESULTS_DIR = "results/"

DATA_ROOT= celeba.CELEBA_ROOT
CELEBA_RESULTS_DIR = os.path.join(
    RESULTS_DIR,
    "celeba/",
)
rc('text', usetex=(LATEX_SYMBOL == "$"))
plt.style.use('seaborn-whitegrid')
seed_everything(42)

# %% [markdown]
# Load Model Configs

# %% [code]
from collections import defaultdict
celeba_configs = defaultdict(dict)

for file in os.listdir(CELEBA_RESULTS_DIR):
    if '_experiment_config.joblib' in file:
        config = load(os.path.join(CELEBA_RESULTS_DIR, file))
        fold = int(file[file.find("_fold_") + len("_fold_"):file.find("_experiment_config")]) - 1
        if "Sequential" in file:
            extra = "Sequential"
        elif "Independent" in file:
            extra = "Independent"
        else:
            extra = ""
            
        model_name = f"{extra}{config['architecture']}{config.get('extra_name', '')}"
        celeba_configs[str(fold)][model_name] = config


print("CelebA Model names:")
for model_name, _ in celeba_configs['0'].items(): 
    print("\t", model_name)

# %% [markdown]
# Load the data

# %% [code]
seed_everything(42)
og_config = celeba_configs['0']['MixtureEmbModelSharedProb_AdaptiveDropout_NoProbConcat']
if og_config.get("use_binary_vector_class", False):
    width = og_config.get('label_binary_width', 5)
    def _binarize(concepts, selected, width):
        result = []
        binary_repr = []
        concepts = concepts[selected]
        for i in range(0, concepts.shape[-1], width):
            binary_repr.append(str(int(np.sum(concepts[i : i + width]) > 0)))
        return int("".join(binary_repr), 2)

    celeba_train_data = torchvision.datasets.CelebA(
        root=DATA_ROOT,
        split='all',
        download=True,
        target_transform=lambda x: x[0].long() - 1,
        target_type=['attr'],
    )

    concept_freq = np.sum(celeba_train_data.attr.cpu().detach().numpy(), axis=0) / celeba_train_data.attr.shape[0]
    print("Concept frequency is:", concept_freq)
    sorted_concepts = list(map(
        lambda x: x[0],
        sorted(enumerate(np.abs(concept_freq - 0.5)), key=lambda x: x[1]),
    ))
    num_concepts = og_config.get('num_concepts', celeba_train_data.attr.shape[-1])
    concept_idxs = sorted_concepts[:num_concepts]
    concept_idxs = sorted(concept_idxs)
    if og_config.get('num_hidden_concepts', 0):
        num_hidden = og_config.get('num_hidden_concepts', 0)
        hidden_concepts = sorted(
            sorted_concepts[num_concepts:min((num_concepts + num_hidden), len(sorted_concepts))]
        )
    else:
        hidden_concepts = []
    print("Selecting concepts:", concept_idxs)
    print("\tAnd hidden concepts:", hidden_concepts)
    celeba_train_data = torchvision.datasets.CelebA(
        root=DATA_ROOT,
        split='all',
        download=True,
        transform=transforms.Compose([
            transforms.Resize(og_config['image_size']),
            transforms.CenterCrop(og_config['image_size']),
            transforms.ToTensor(),
            transforms.ConvertImageDtype(torch.float32),
            transforms.Normalize((0.5, 0.5, 0.5), (0.5, 0.5, 0.5)),
        ]),
        target_transform=lambda x: [
            torch.tensor(
                _binarize(x[1].cpu().detach().numpy(), selected=(concept_idxs + hidden_concepts), width=width),
                dtype=torch.long,
            ),
            x[1][concept_idxs].float(),
        ],
        target_type=['identity', 'attr'],
    )
    label_remap = {}
    vals, counts = np.unique(
        list(map(
            lambda x: _binarize(x.cpu().detach().numpy(), selected=(concept_idxs + hidden_concepts), width=width),
            celeba_train_data.attr
        )),
        return_counts=True,
    )
    for i, label in enumerate(vals):
        label_remap[label] = i

    celeba_train_data = torchvision.datasets.CelebA(
        root=DATA_ROOT,
        split='all',
        download=True,
        transform=transforms.Compose([
            transforms.Resize(og_config['image_size']),
            transforms.CenterCrop(og_config['image_size']),
            transforms.ToTensor(),
            transforms.ConvertImageDtype(torch.float32),
            transforms.Normalize((0.5, 0.5, 0.5), (0.5, 0.5, 0.5)),
        ]),
        target_transform=lambda x: [
            torch.tensor(
                label_remap[_binarize(x[1].cpu().detach().numpy(), selected=(concept_idxs + hidden_concepts), width=width)],
                dtype=torch.long,
            ),
            x[1][concept_idxs].float(),
        ],
        target_type=['identity', 'attr'],
    )
    num_classes = len(label_remap)

    # And subsample to reduce its massive size
    factor = og_config.get('label_dataset_subsample', 1)
    if factor != 1:
        train_idxs = np.random.choice(
            np.arange(0, len(celeba_train_data)),
            replace=False,
            size=len(celeba_train_data)//factor,
        )
        print("Subsampling to", len(train_idxs), "elements.")
        celeba_train_data = torch.utils.data.Subset(celeba_train_data, train_idxs)
else:
    concept_selection = list(range(0, len(celeba.CONCEPT_SEMANTICS)))
    if og_config.get('selected_concepts', False):
        concept_selection = celeba.SELECTED_CONCEPTS
    num_classes = og_config['num_classes']
    sorted_labels = np.load(
        os.path.join(
            CELEBA_RESULTS_DIR,
            f"selected_top_{num_classes}_labels.npy",
        ),
    )
    label_remap = {}
    for i, label in enumerate(sorted_labels):
        label_remap[label] = i
    print("len(label_remap) =", len(label_remap))


    # Now reload by transform the labels accordingly
    celeba_train_data = torchvision.datasets.CelebA(
        root=DATA_ROOT,
        split='all',
        download=True,
        transform=transforms.Compose([
            transforms.Resize(64),
            transforms.CenterCrop(64),
            transforms.ToTensor(),
            transforms.ConvertImageDtype(torch.float32),
            transforms.Normalize((0.5, 0.5, 0.5), (0.5, 0.5, 0.5)),
        ]),
        target_transform=lambda x: [
            torch.tensor(
                label_remap.get(x[0].cpu().detach().item() - 1, num_classes),
                dtype=torch.long,
            ),
            x[1][concept_selection].float(),
        ],
        target_type=['identity', 'attr'],
    )

    train_idxs = np.where(
        list(map(lambda x: x.cpu().detach().item() - 1 in label_remap, celeba_train_data.identity))
    )[0]
    celeba_train_data = torch.utils.data.Subset(celeba_train_data, train_idxs)
total_samples = len(celeba_train_data)
train_samples = int(0.7 * total_samples)
test_samples = int(0.2 * total_samples)
val_samples = total_samples - test_samples - train_samples
print(f"Data split is: {total_samples} = {train_samples} (train) + {test_samples} (test) + {val_samples} (validation)")
celeba_train_data, celeba_test_data, celeba_val_data = torch.utils.data.random_split(
    celeba_train_data,
    [train_samples, test_samples, val_samples],
)
train_dl = torch.utils.data.DataLoader(
    celeba_train_data,
    batch_size=1024,
    shuffle=True,
    num_workers=NUM_WORKERS,
)
test_dl = torch.utils.data.DataLoader(
    celeba_test_data,
    batch_size=1024,
    shuffle=False,
    num_workers=NUM_WORKERS,
)
val_dl = torch.utils.data.DataLoader(
    celeba_val_data,
    batch_size=1024,
    shuffle=False,
    num_workers=NUM_WORKERS,
)

label_set = set()
sample = next(iter(train_dl))
real_sample = []
for derp in sample:
    if isinstance(derp, list):
        real_sample += derp
    else:
        real_sample.append(derp)
sample = real_sample
print("Sample has", len(sample), "elements.")
for i, derp in enumerate(sample):
    print("Element", i, "has shape", derp.shape, "and type", derp.dtype)

N_CONCEPTS, N_TASKS = sample[2].shape[-1], num_classes #len(label_set)    

print("Training sample shape is:", sample[0].shape)
print("Training label shape is:", sample[1].shape)
print("Training concept shape is:", sample[2].shape)

attribute_count = np.zeros((N_CONCEPTS,))
samples_seen = 0
for i, (_, (y, c)) in enumerate(train_dl):
    print("\rIn batch", i, "we have seen", len(label_set), "classes")
    c = c.cpu().detach().numpy()
    attribute_count += np.sum(c, axis=0)
    samples_seen += c.shape[0]
    for l in y.reshape(-1).cpu().detach():
        label_set.add(l.item())

imbalance = samples_seen/attribute_count  - 1
print(imbalance)
print("Found a total of", len(label_set), "classes")


print("Computing the correlation matrix for concepts:")
total_c = []
for (_, (_, c)) in train_dl:
    total_c.append(c.cpu().detach())
total_c = np.concatenate(total_c, axis=0)
concept_corr_matrix = np.corrcoef(total_c.T)
print("Concept correlation matrix shape:", concept_corr_matrix.shape)
print(
    "Max absolute correlation value:", np.max(np.abs(concept_corr_matrix - np.eye(N_CONCEPTS))),
    "Max correlation value:", np.max(concept_corr_matrix - np.eye(N_CONCEPTS)),
    "Min absolute correlation value:", np.min(np.abs(concept_corr_matrix - np.eye(N_CONCEPTS))),
    "Min correlation value:", np.min(concept_corr_matrix - np.eye(N_CONCEPTS)),
    "Mean absolute value:", np.mean(np.abs(concept_corr_matrix - np.eye(N_CONCEPTS))),
    "Mean value:", np.mean(concept_corr_matrix - np.eye(N_CONCEPTS)),
)

# %% [markdown]
# Load CelebA Models

# %% [code]
def load_trained_model(
    config,
    n_tasks=N_TASKS,
    result_dir=CELEBA_RESULTS_DIR,
    n_concepts=N_CONCEPTS,
    split=0,
    imbalance=None,
    intervention_idxs=None,
    adversarial_intervention=False,
    train_dl=None,
    sequential=False,
    independent=False,
):
    if split is not None:
        full_run_name = f"{config['architecture']}{config.get('extra_name', '')}_{config['c_extractor_arch']}_fold_{split + 1}"
    else:
        full_run_name = f"{config['architecture']}{config.get('extra_name', '')}_{config['c_extractor_arch']}"
    selected_concepts = np.arange(n_concepts)
    if config.get("message_passing_layers"):
        edges = []
        edge_weights = []
        corr_thresh = config.get('corr_thresh')
        sorted_selected = sorted(selected_concepts)
        for i in range(n_concepts):
            i_idx = sorted_selected[i]
            for j in range(i + 1, n_concepts):
                j_idx = sorted_selected[j]
                if np.abs(concept_corr_matrix[i_idx, j_idx]) >= corr_thresh:
                    edges.append(np.array([[i, j], [j, i]]))
                    if config.get("weighted_edges"):
                        weight = np.abs(concept_corr_matrix[i_idx, j_idx])
                    else:
                        weight = 1
                    edge_weights.extend([weight, weight])
        concept_edge_list = torch.cuda.LongTensor(np.concatenate(edges, axis=-1))
        concept_edge_weights = torch.cuda.FloatTensor(np.array(edge_weights))
    else:
        concept_edge_list = None
        concept_edge_weights = None
    if (
        (intervention_idxs is not None) and
        (train_dl is not None) and
        (config['architecture'] == "ConceptBottleneckModel") and
        (not config.get('sigmoidal_prob', True))
    ):
        # Then let's look at the empirical distribution of the logits in order to
        # be able to intervene
        model = models.construct_model(
            n_concepts=n_concepts,
            n_tasks=n_tasks,
            config=config,
            imbalance=imbalance,
            concept_edge_list=concept_edge_list,
            concept_edge_weights=concept_edge_weights,
        )
        trainer = pl.Trainer(
            gpus=GPU,
        )
        batch_results = trainer.predict(model, train_dl)
        out_embs = np.concatenate(
            list(map(lambda x: x[1], batch_results)),
            axis=0,
        )
        active_intervention_values = []
        inactive_intervention_values = []
        for idx in range(n_concepts):
            active_intervention_values.append(np.percentile(out_embs[:, idx], 95))
            inactive_intervention_values.append(np.percentile(out_embs[:, idx], 5))
        print("For", full_run_name, "we found its intervention values to be:")
        print("\tactive_intervention_values =", active_intervention_values)
        print("\tinactive_intervention_values =", inactive_intervention_values)
        active_intervention_values = torch.cuda.FloatTensor(active_intervention_values)
        inactive_intervention_values = torch.cuda.FloatTensor(inactive_intervention_values)
    else:
        active_intervention_values = inactive_intervention_values = None
    
    if sequential:
        _, c2y_model = models.construct_sequential_models(
            n_concepts=n_concepts,
            n_tasks=n_tasks,
            config=config,
            imbalance=imbalance,
        )
    elif independent:
        _, c2y_model = models.construct_sequential_models(
            n_concepts=n_concepts,
            n_tasks=n_tasks,
            config=config,
            imbalance=imbalance,
        )
    else:
        c2y_model = None
    model = models.construct_model(
        n_concepts=n_concepts,
        n_tasks=n_tasks,
        config=config,
        imbalance=imbalance,
        concept_edge_list=concept_edge_list,
        concept_edge_weights=concept_edge_weights,
        intervention_idxs=intervention_idxs,
        adversarial_intervention=adversarial_intervention,
        active_intervention_values=active_intervention_values,
        inactive_intervention_values=inactive_intervention_values,
        c2y_model=c2y_model,
    )
    print("sequential =", sequential)
    print("independent =", independent)
    if sequential:
        extra = "Sequential"
    elif independent:
        extra = "Independent"
    else:
        extra = ""
    print("extra =", extra)
    model_saved_path = os.path.join(
        result_dir or ".",
        f'{extra}{full_run_name}.pt'
    )
    model.load_state_dict(torch.load(model_saved_path))
    return model

# %% [markdown]
## Test Interventions on CelebA Models

# %% [code]
import joblib
if os.path.exists(
    os.path.join("results/celeba_bin_intervention", f'total_y_accs.joblib')
):
    total_y_accs = joblib.load(os.path.join("results/celeba_bin_intervention", f'total_y_accs.joblib'))
    total_c_accs = joblib.load(os.path.join("results/celeba_bin_intervention", f'total_c_accs.joblib'))
else:
    total_y_accs = []
    total_c_accs = []

# %% [code]
import models_cub
reload(cub)
reload(models_cub)

WHITELIST = [
    "ConceptBottleneckModelFuzzy",
    "ConceptBottleneckModelBool",
    "ConceptBottleneckModelFuzzyExtraCapacity_Logit",
    'MixtureEmbModelSharedProb_AdaptiveDropout_NoProbConcat',
    'MixtureEmbModelSharedProb_Adaptive_NoProbConcat',
    "IndependentConceptBottleneckModel",
    "SequentialConceptBottleneckModel",
]

concepts_to_intervene = list(range(0, N_CONCEPTS + 1,))
for j, num_concepts_intervened in enumerate(concepts_to_intervene):
    while len(total_y_accs) <= j:
        total_y_accs.append(defaultdict(list))
        total_c_accs.append(defaultdict(list))
    intervention_y_accs = total_y_accs[j]
    c_accs = total_c_accs[j]
    print("Intervening with", num_concepts_intervened, "our of", N_CONCEPTS, "concepts")
    for split, runs in celeba_configs.items():
        intervention_idxs = sorted(np.random.choice(
            list(range(N_CONCEPTS)),
            size=num_concepts_intervened,
            replace=False,
        ))
        print("\tFor fold", split, "we will intervene on concepts", intervention_idxs)
        for model_name, config in runs.items(): 
            config["shared_prob_gen"] = config.get("shared_prob_gen", False)
            config["per_concept_weight"] = config.get("per_concept_weight", False)
            if (model_name not in WHITELIST) or ("NoConceptSupervision" in model_name):
                continue
            if (model_name in intervention_y_accs) and len(intervention_y_accs[model_name]) > (int(split)):
                print("\tSkipping", model_name, "as it was found in cached results")
                continue
            print("Loading model", model_name, "with", len(intervention_y_accs[model_name]), "prev values")
            model = load_trained_model(
                config=config,
                n_tasks=N_TASKS,
                n_concepts=N_CONCEPTS,
                result_dir=CELEBA_RESULTS_DIR,
                split=int(split),
                intervention_idxs=intervention_idxs,
                imbalance=imbalance if config.get("use_imbalance", False) else None,
                train_dl=train_dl,
                sequential=("Sequential" in model_name),
                independent=("Independent" in model_name),
            )
            print("imbalance:", imbalance if config.get("use_imbalance", False) else None)
            trainer = pl.Trainer(
                gpus=GPU,
            )
            [test_results] = trainer.test(model, test_dl, verbose=False,)
            print("\tFor model:", model_name, f"(fold {split}) intervening with", num_concepts_intervened, "gives:")
            print("\t\tTest task accuracy:", test_results['test_y_accuracy'])
            intervention_y_accs[model_name].append(test_results['test_y_accuracy'])
            print("\t\tOriginal concept accuracy:", test_results['test_c_accuracy'])
            c_accs[model_name].append(test_results['test_c_accuracy'])


# %% [code]
y_acc_means = [
    {
        method: np.mean(vals)
        for method, vals in results.items()
    } for results in total_y_accs
]
y_acc_stds = [
    {
        method: np.std(vals)
        for method, vals in results.items()
    } for results in total_y_accs
]
method_names = list(y_acc_means[-1].keys())

x_vals = concepts_to_intervene
fig, ax = plt.subplots(figsize=(6, 4))
clrs = sns.color_palette("colorblind", 30)

color_map = {
    'No Concepts': clrs[7],
    'Sequential-CBM': clrs[1],
    'Bool-CBM': clrs[2],
    'Independent-CBM': clrs[3],
    'Fuzzy-CBM': clrs[5],
    'Hybrid-CBM': clrs[6],
    "MixCEM (ours)": clrs[9],
    "MixCEM + RandInt (ours)": clrs[10],
}
method_to_actual_name = {
    'SequentialConceptBottleneckModel': 'Sequential-CBM',
    'IndependentConceptBottleneckModel': 'Independent-CBM',
    'ConceptBottleneckModelBool': 'Bool-CBM',
    'ConceptBottleneckModelFuzzy': 'Fuzzy-CBM',
    'ConceptBottleneckModelFuzzyExtraCapacity_Logit': 'Hybrid-CBM',
    'MixtureEmbModelSharedProb_AdaptiveDropout_NoProbConcat': "MixCEM (ours)",
    'MixtureEmbModelSharedProb_Adaptive_NoProbConcat': "MixCEM without RandInt (ours)",
}


for method_name in method_names:
    print(method_name)
    if method_name not in method_to_actual_name:
        continue
    means = np.array([item[method_name] * 100 for item in y_acc_means])
    stds = np.array([item[method_name] * 100 for item in y_acc_stds])
    method_name = method_to_actual_name.get(method_name, method_name)
    if method_name not in color_map:
        color_map[method_name] = clrs[len(color_map)]
    color = color_map[method_name]
    ax.plot(
        x_vals,
        means,
        c=color,
        zorder=1,
    )
    ax.scatter(
        x_vals,
        means,
        s=50,
        label=method_name,
        color=color,
        zorder=2,
        marker="x" if "(ours)" in method_name else ".",
    )
    ax.fill_between(
        x_vals,
        means - stds,
        means + stds,
        alpha=0.3,
        facecolor=color,
    )

ax.set_xlabel("Concepts Intervened", fontsize=15)
ax.set_ylabel("Task Accuracy (%)", fontsize=15)

ax.grid(False)
handles, labels = ax.get_legend_handles_labels()
plt.title('CelebA Concept Intervention', fontsize=20)
lgd = fig.legend(handles, labels, fontsize=15, loc='upper center', bbox_to_anchor=(0.5,-0.001), ncol=3)

plt.show()

# %% [code]
import joblib
joblib.dump(total_y_accs, os.path.join("results/celeba_bin_intervention", f'total_y_accs.joblib'))
joblib.dump(total_c_accs, os.path.join("results/celeba_bin_intervention", f'total_c_accs.joblib'))

# %% [markdown]
## Test incorrect interventions in CUB

# %% [code]
import joblib
if os.path.exists(
    os.path.join("results/celeba_bin_intervention", f'incorrect_total_y_accs.joblib')
):
    adversarial_total_y_accs = joblib.load(os.path.join("results/celeba_bin_intervention", f'incorrect_total_y_accs.joblib'))
else:
    adversarial_total_y_accs = []


# %% [code]
import models_cub
reload(cub)
reload(models_cub)

concepts_to_intervene = list(range(0, N_CONCEPTS + 1))
for j, num_concepts_intervened in enumerate(concepts_to_intervene):
    while len(adversarial_total_y_accs) <= j:
        adversarial_total_y_accs.append(defaultdict(list))
    intervention_y_accs = adversarial_total_y_accs[j]
    print("Intervening with", num_concepts_intervened, "our of", N_CONCEPTS, "concepts")
    for split, runs in celeba_configs.items():
        intervention_idxs = sorted(np.random.choice(
            list(range(N_CONCEPTS)),
            size=num_concepts_intervened,
            replace=False,
        ))
        print("\tFor fold", split, "we will intervene on concepts", intervention_idxs)
        for model_name, config in runs.items(): 
            config["shared_prob_gen"] = config.get("shared_prob_gen", False)
            config["per_concept_weight"] = config.get("per_concept_weight", False)
            if (model_name not in WHITELIST) or ("NoConceptSupervision" in model_name):
                continue
            if (model_name in intervention_y_accs) and len(intervention_y_accs[model_name]) >= (int(split) + 1):
                print("\tSkipping", model_name, "as it was found in cached results")
                continue
            model = load_trained_model(
                config=config,
                n_tasks=N_TASKS,
                n_concepts=N_CONCEPTS,
                result_dir=CELEBA_RESULTS_DIR,
                split=int(split),
                intervention_idxs=intervention_idxs,
                imbalance=imbalance if config.get("use_imbalance", False) else None,\
                adversarial_intervention=True,
                sequential=("Sequential" in model_name),
                independent=("Independent" in model_name),
            )
            print("imbalance:", imbalance if config.get("use_imbalance", False) else None)
            trainer = pl.Trainer(
                gpus=GPU,
            )
            [test_results] = trainer.test(model, test_dl, verbose=False,)
            print("\tFor model:", model_name, f"(fold {split}) intervening with", num_concepts_intervened, "gives:")
            print("\t\tTest task accuracy:", test_results['test_y_accuracy'])
            intervention_y_accs[model_name].append(test_results['test_y_accuracy'])
            print("\t\tOriginal concept accuracy:", test_results['test_c_accuracy'])


# %% [code]
import joblib
joblib.dump(
    adversarial_total_y_accs,
    os.path.join("results/celeba_bin_intervention", f'adversarial_total_y_accs.joblib'),
)

# %% [code]
y_acc_means = [
    {
        method: np.mean(vals)
        for method, vals in results.items()
    } for results in adversarial_total_y_accs
]
y_acc_stds = [
    {
        method: np.std(vals)
        for method, vals in results.items()
    } for results in adversarial_total_y_accs
]
method_names = list(y_acc_means[-1].keys())

x_vals = concepts_to_intervene
fig, ax = plt.subplots(figsize=(6, 4))
color_map = {
    'No Concepts': clrs[7],
    'Sequential-CBM': clrs[1],
    'Bool-CBM': clrs[2],
    'Independent-CBM': clrs[3],
    'Fuzzy-CBM': clrs[5],
    'Hybrid-CBM': clrs[6],
    "MixCEM (ours)": clrs[9],
    "MixCEM + RandInt (ours)": clrs[10],
}
method_to_actual_name = {
    'SequentialConceptBottleneckModel': 'Sequential-CBM',
    'IndependentConceptBottleneckModel': 'Independent-CBM',
    'ConceptBottleneckModelBool': 'Bool-CBM',
    'ConceptBottleneckModelFuzzy': 'Fuzzy-CBM',
    'ConceptBottleneckModelFuzzyExtraCapacity_Logit': 'Hybrid-CBM',
    'MixtureEmbModelSharedProb_AdaptiveDropout_NoProbConcat': "MixCEM (ours)",
    'MixtureEmbModelSharedProb_Adaptive_NoProbConcat': "MixCEM without RandInt (ours)",
}


for method_name in method_names:
    print(method_name)
    if method_name not in method_to_actual_name:
        continue
    means = np.array([item[method_name] * 100 for item in y_acc_means])
    stds = np.array([item[method_name] * 100 for item in y_acc_stds])
    method_name = method_to_actual_name.get(method_name, method_name)
    if method_name not in color_map:
        color_map[method_name] = clrs[len(color_map)]
    color = color_map[method_name]
    ax.plot(
        x_vals,
        means,
        c=color,
        zorder=1,
    )
    ax.scatter(
        x_vals,
        means,
        s=50,
        label=method_name,
        color=color,
        zorder=2,
        marker="x" if "(ours)" in method_name else ".",
    )
    ax.fill_between(
        x_vals,
        means - stds,
        means + stds,
        alpha=0.3,
        facecolor=color,
    )

ax.set_xlabel("Concepts Adversarially Intervened", fontsize=15)
ax.set_ylabel("Task Accuracy (%)", fontsize=15)

ax.grid(False)
handles, labels = ax.get_legend_handles_labels()
plt.title('CelebA Concept Intervention', fontsize=20)
lgd = fig.legend(handles, labels, fontsize=15, loc='upper center', bbox_to_anchor=(0.5,-0.001), ncol=3)

plt.show()

# %% [markdown]
# Finally, let's see how the embedding size affects interventions

# %% [code]
import joblib
if False and os.path.exists(
    os.path.join("results/celeba_bin_intervention", f'emb_ablation_total_y_accs.joblib')
):
    emb_seen = joblib.load(os.path.join("results/celeba_bin_intervention", f'emb_ablation_seen.joblib'))
    emb_ablation_total_y_accs = joblib.load(os.path.join("results/celeba_bin_intervention", f'emb_ablation_total_y_accs.joblib'))
else:
    emb_ablation_total_y_accs = defaultdict(lambda: defaultdict(list))
    emb_seen = set()


# %% [code]
import models_cub
reload(cub)
reload(models_cub)
max_emb_size = 32
CELEBA_ABLATION_RESULTS_DIR = "results/celeba_emb_size_ablation"
emb_ablation_configs = defaultdict(dict)
for file in os.listdir(CELEBA_ABLATION_RESULTS_DIR):
    if '_experiment_config.joblib' in file:
        config = load(os.path.join(CELEBA_ABLATION_RESULTS_DIR, file))
        fold = int(file[file.find("_fold_") + len("_fold_"):file.find("_experiment_config")]) - 1
        model_name = f"{config['architecture']}{config.get('extra_name', '')}"
        emb_ablation_configs[str(fold)][model_name] = config
print("CUB Emb Ablation Model names:")
for model_name, _ in emb_ablation_configs['0'].items(): 
    print("\t", model_name)


WHITELIST = [
    "ConceptBottleneckModelFuzzy",
    "ConceptBottleneckModelFuzzyExtraCapacity_Logit",
    'MixtureEmbModelSharedProb_AdaptiveDropout_NoProbConcat',
    'MixtureEmbModelSharedProb_Adaptive_NoProbConcat',
]


splits = sorted(emb_ablation_configs.keys())

for split in splits:
    runs = emb_ablation_configs[split]
    model_names = sorted(runs.keys())
    for num_concepts_intervened in [
        0,
        int(N_CONCEPTS * 0.25),
        int(N_CONCEPTS * 0.5),
        int(N_CONCEPTS * 0.75),
        N_CONCEPTS,
    ]:
        intervention_idxs = sorted(np.random.choice(
            list(range(N_CONCEPTS)),
            size=num_concepts_intervened,
            replace=False,
        ))
        for model_name in model_names: 
            config = runs[model_name]
            config["shared_prob_gen"] = config.get("shared_prob_gen", False)
            config["per_concept_weight"] = config.get("per_concept_weight", False)
            if config["emb_size"] > max_emb_size:
                print("Skipping model", model_name, "as it has embedding size", config["emb_size"])
                continue
            if "NoConceptSupervision" in model_name:
                continue
            key = (model_name, split, num_concepts_intervened, config["emb_size"])
            if key in emb_seen:
                print("Skipping this as we have already seen it for", model_name)
                continue
            print("Running", model_name, "with", num_concepts_intervened, "intervened concepts for fold", int(fold))
            model = load_trained_model(
                config=config,
                n_tasks=N_TASKS,
                n_concepts=N_CONCEPTS,
                result_dir=CELEBA_ABLATION_RESULTS_DIR,
                split=int(split),
                imbalance=imbalance,
                intervention_idxs=intervention_idxs,
                train_dl=train_dl,
            )
            trainer = pl.Trainer(
                gpus=GPU,
            )
            [test_results] = trainer.test(model, test_dl, verbose=False,)
            print(
                "\tFor model:", model_name, f"(fold {int(split) + 1} trained with emb {config['emb_size']})",
                "intervening with", num_concepts_intervened, "gives:"
            )
            print("\t\tTest task accuracy:", test_results['test_y_accuracy'])
            emb_ablation_total_y_accs[model_name][config['emb_size']].append(
                test_results['test_y_accuracy']
            )
            emb_seen.add(key)
            print("\t\tOriginal concept accuracy:", test_results['test_c_accuracy'])


# %% [code]
import joblib
joblib.dump(
    emb_ablation_total_y_accs,
    os.path.join("results/celeba_bin_intervention", f'emb_ablation_total_y_accs.joblib'),
)
joblib.dump(
    emb_seen,
    os.path.join("results/celeba_bin_intervention", f'emb_ablation_seen.joblib'),
)
