# Supplementary material
Source: ML conference proceedings conference paper supplement (https://proceedings.neurips.cc/paper_files/paper/2022/hash/867c06823281e506e8059f5c13a57f75-Abstract.html)
Supplement: Supplementary file 1 [file 867c06823281e506e8059f5c13a57f75-Supplemental-Conference.zip › SupplementaryMaterial/code/core/CUB200/cub_loader.py]

"""
General utils for training, evaluation and data loading
"""
import os
import torch
import pickle
import numpy as np
import torchvision.transforms as transforms

from PIL import Image
from torch.utils.data import BatchSampler
from torch.utils.data import Dataset, DataLoader

# General
BASE_DIR = ''
N_ATTRIBUTES = 112
N_CLASSES = 200

# Training
UPWEIGHT_RATIO = 9.0
MIN_LR = 0.0001
LR_DECAY_SIZE = 0.1

class Sampler(object):
    """Base class for all Samplers.
    Every Sampler subclass has to provide an __iter__ method, providing a way
    to iterate over indices of dataset elements, and a __len__ method that
    returns the length of the returned iterators.
    """

    def __init__(self, data_source):
        pass

    def __iter__(self):
        raise NotImplementedError

    def __len__(self):
        raise NotImplementedError

class StratifiedSampler(Sampler):
    """Stratified Sampling
    Provides equal representation of target classes in each batch
    """
    def __init__(self, class_vector, batch_size):
        """
        Arguments
        ---------
        class_vector : torch tensor
            a vector of class labels
        batch_size : integer
            batch_size
        """
        self.n_splits = int(class_vector.size(0) / batch_size)
        self.class_vector = class_vector

    def gen_sample_array(self):
        try:
            from sklearn.model_selection import StratifiedShuffleSplit
        except:
            print('Need scikit-learn for this functionality')
        import numpy as np

        s = StratifiedShuffleSplit(n_splits=self.n_splits, test_size=0.5)
        X = torch.randn(self.class_vector.size(0),2).numpy()
        y = self.class_vector.numpy()
        s.get_n_splits(X, y)

        train_index, test_index = next(s.split(X, y))
        return np.hstack([train_index, test_index])

    def __iter__(self):
        return iter(self.gen_sample_array())

    def __len__(self):
        return len(self.class_vector)

class CUBDataset(Dataset):
    """
    Returns a compatible Torch Dataset object customized for the CUB dataset
    """

    def __init__(self, pkl_file_paths, use_attr, no_img, uncertain_label, image_dir, n_class_attr, root_dir='../data/CUB200/', transform=None, concept_transform=None):
        """
        Arguments:
        pkl_file_paths: list of full path to all the pkl data
        use_attr: whether to load the attributes (e.g. False for simple finetune)
        no_img: whether to load the images (e.g. False for A -> Y model)
        uncertain_label: if True, use 'uncertain_attribute_label' field (i.e. label weighted by uncertainty score, e.g. 1 & 3(probably) -> 0.75)
        image_dir: default = 'images'. Will be append to the parent dir
        n_class_attr: number of classes to predict for each attribute. If 3, then make a separate class for not visible
        transform: whether to apply any special transformation. Default = None, i.e. use standard ImageNet preprocessing
        """
        self.data = []
        self.is_train = any(["train" in path for path in pkl_file_paths])
        if not self.is_train:
            assert any([("test" in path) or ("val" in path) for path in pkl_file_paths])
        for file_path in pkl_file_paths:
            self.data.extend(pickle.load(open(file_path, 'rb')))
        self.transform = transform
        self.concept_transform = concept_transform
        self.use_attr = use_attr
        self.no_img = no_img
        self.uncertain_label = uncertain_label
        self.image_dir = image_dir
        self.n_class_attr = n_class_attr
        self.root_dir = root_dir

    def __len__(self):
        return len(self.data)

    def __getitem__(self, idx):
        img_data = self.data[idx]
        img_path = img_data['img_path']
        img_path = img_path.replace(
            '/juice/scr/scr102/scr/thaonguyen/CUB_supervision/datasets/',
            '../data/CUB200/'
        )
        # Trim unnecessary paths
        try:
            idx = img_path.split('/').index('CUB_200_2011')
            # if self.image_dir != 'images':
            #     img_path = '/'.join([self.image_dir] + img_path.split('/')[idx+1:])
            #     img_path = img_path.replace('images/', '')
            # else:
            img_path = self.root_dir + '/' + '/'.join(img_path.split('/')[idx:])
            img = Image.open(img_path).convert('RGB')
        except:
            img_path_split = img_path.split('/')
            split = 'train' if self.is_train else 'test'
            img_path = '/'.join(img_path_split[:2] + [split] + img_path_split[2:])
            img = Image.open(img_path).convert('RGB')

        class_label = img_data['class_label']
        if self.transform:
            img = self.transform(img)

        if self.use_attr:
            if self.uncertain_label:
                attr_label = img_data['uncertain_attribute_label']
            else:
                attr_label = img_data['attribute_label']
            if self.concept_transform is not None:
                attr_label = self.concept_transform(attr_label)
            if self.no_img:
                if self.n_class_attr == 3:
                    one_hot_attr_label = np.zeros((N_ATTRIBUTES, self.n_class_attr))
                    one_hot_attr_label[np.arange(N_ATTRIBUTES), attr_label] = 1
                    return one_hot_attr_label, class_label
                else:
                    return attr_label, class_label
            else:
                return img, class_label, torch.FloatTensor(attr_label)
        else:
            return img, class_label


class ImbalancedDatasetSampler(torch.utils.data.sampler.Sampler):
    """Samples elements randomly from a given list of indices for imbalanced dataset
    Arguments:
        indices (list, optional): a list of indices
        num_samples (int, optional): number of samples to draw
    """

    def __init__(self, dataset, indices=None):
        # if indices is not provided,
        # all elements in the dataset will be considered
        self.indices = list(range(len(dataset))) \
            if indices is None else indices

        # if num_samples is not provided,
        # draw `len(indices)` samples in each iteration
        self.num_samples = len(self.indices)

        # distribution of classes in the dataset
        label_to_count = {}
        for idx in self.indices:
            label = self._get_label(dataset, idx)
            if label in label_to_count:
                label_to_count[label] += 1
            else:
                label_to_count[label] = 1

        # weight for each sample
        weights = [1.0 / label_to_count[self._get_label(dataset, idx)]
                   for idx in self.indices]
        self.weights = torch.DoubleTensor(weights)

    def _get_label(self, dataset, idx):  # Note: for single attribute dataset
        return dataset.data[idx]['attribute_label'][0]

    def __iter__(self):
        idx = (self.indices[i] for i in torch.multinomial(
            self.weights, self.num_samples, replacement=True))
        return idx

    def __len__(self):
        return self.num_samples


def load_data(
    pkl_paths,
    use_attr,
    no_img,
    batch_size,
    uncertain_label=False,
    n_class_attr=2,
    image_dir='images',
    resampling=False,
    resol=299,
    root_dir='../data/CUB200/',
    num_workers=1,
    concept_transform=None,
):
    """
    Note: Inception needs (299,299,3) images with inputs scaled between -1 and 1
    Loads data with transformations applied, and upsample the minority class if there is class imbalance and weighted loss is not used
    NOTE: resampling is customized for first attribute only, so change sampler.py if necessary
    """
    resized_resol = int(resol * 256/224)
    is_training = any(['train.pkl' in f for f in pkl_paths])
    if is_training:
        transform = transforms.Compose([
            #transforms.Resize((resized_resol, resized_resol)),
            #transforms.RandomSizedCrop(resol),
            transforms.ColorJitter(brightness=32/255, saturation=(0.5, 1.5)),
            transforms.RandomResizedCrop(resol),
            transforms.RandomHorizontalFlip(),
            transforms.ToTensor(), #implicitly divides by 255
            transforms.Normalize(mean = [0.5, 0.5, 0.5], std = [2, 2, 2])
            #transforms.Normalize(mean = [ 0.485, 0.456, 0.406 ], std = [ 0.229, 0.224, 0.225 ]),
            ])
    else:
        transform = transforms.Compose([
            #transforms.Resize((resized_resol, resized_resol)),
            transforms.CenterCrop(resol),
            transforms.ToTensor(), #implicitly divides by 255
            transforms.Normalize(mean = [0.5, 0.5, 0.5], std = [2, 2, 2])
            #transforms.Normalize(mean = [ 0.485, 0.456, 0.406 ], std = [ 0.229, 0.224, 0.225 ]),
            ])

    dataset = CUBDataset(
        pkl_file_paths=pkl_paths,
        use_attr=use_attr,
        no_img=no_img,
        uncertain_label=uncertain_label,
        image_dir=image_dir,
        n_class_attr=n_class_attr,
        transform=transform,
        root_dir=root_dir,
        concept_transform=concept_transform,
    )
    if is_training:
        drop_last = True
        shuffle = True
    else:
        drop_last = False
        shuffle = False
    if resampling:
        sampler = StratifiedSampler(ImbalancedDatasetSampler(dataset), batch_size=batch_size)
        loader = DataLoader(dataset, batch_sampler=sampler, num_workers=num_workers)
    else:
        loader = DataLoader(dataset, batch_size=batch_size, shuffle=shuffle, drop_last=drop_last, num_workers=num_workers)
    return loader

def find_class_imbalance(pkl_file, multiple_attr=False, attr_idx=-1):
    """
    Calculate class imbalance ratio for binary attribute labels stored in pkl_file
    If attr_idx >= 0, then only return ratio for the corresponding attribute id
    If multiple_attr is True, then return imbalance ratio separately for each attribute. Else, calculate the overall imbalance across all attributes
    """
    imbalance_ratio = []
    data = pickle.load(open(os.path.join(BASE_DIR, pkl_file), 'rb'))
    n = len(data)
    n_attr = len(data[0]['attribute_label'])
    if attr_idx >= 0:
        n_attr = 1
    if multiple_attr:
        n_ones = [0] * n_attr
        total = [n] * n_attr
    else:
        n_ones = [0]
        total = [n * n_attr]
    for d in data:
        labels = d['attribute_label']
        if multiple_attr:
            for i in range(n_attr):
                n_ones[i] += labels[i]
        else:
            if attr_idx >= 0:
                n_ones[0] += labels[attr_idx]
            else:
                n_ones[0] += sum(labels)
    for j in range(len(n_ones)):
        imbalance_ratio.append(total[j]/n_ones[j] - 1)
    if not multiple_attr: #e.g. [9.0] --> [9.0] * 312
        imbalance_ratio *= n_attr
    return imbalance_ratio


if __name__ == '__main__':
    # train_loader = load_data([train_data_path], args.use_attr, args.no_img, args.batch_size, args.uncertain_labels,
    #                          image_dir=args.image_dir,
    #                          n_class_attr=args.n_class_attr, resampling=args.resampling)
    # val_loader = load_data([val_data_path], args.use_attr, args.no_img, args.batch_size, image_dir=args.image_dir,
    #                        n_class_attr=args.n_class_attr)
    val_loader = load_data(pkl_paths=['val.pkl'], use_attr=True, no_img=False, batch_size=128)
    loader = DataLoader(val_loader, batch_size=128, shuffle=True, drop_last=True)
    b = next(iter(loader))
    print()
