# Supplementary material
Source: ML conference proceedings conference paper supplement (https://proceedings.neurips.cc/paper_files/paper/2022/hash/867c06823281e506e8059f5c13a57f75-Abstract.html)
Supplement: Supplementary file 1 [file 867c06823281e506e8059f5c13a57f75-Supplemental-Conference.zip › SupplementaryMaterial/code/core/cub_intervention_experiments.ipynb]

# %% [markdown]
# Setup

# %% [code]
%load_ext autoreload
%load_ext tensorboard
%matplotlib inline

# %% [code]
import matplotlib
import numpy as np
import os
import random
import tensorflow as tf
import yaml
import matplotlib.pyplot as plt
import numpy as np
from matplotlib import rc
from matplotlib import cm
import seaborn as sns
from importlib import reload
from pathlib import Path
import sklearn
from tensorflow.keras.models import load_model
from joblib import dump, load
import pandas as pd
import cub_experiments as cub
import models
from CUB200.cub_loader import load_data, find_class_imbalance
import torch
import pytorch_lightning as pl
from pytorch_lightning import seed_everything

# %% [code]
################################################################################
## Global Variables Defining Experiment Flow
################################################################################

GPU = 1
NUM_WORKERS = 10
LATEX_SYMBOL = "$"
RESULTS_DIR = "./results/"
CUB_RESULTS_DIR = os.path.join(
    RESULTS_DIR,
    "cub",
)

CUB_ABLATION_RESULTS_DIR = os.path.join(
    "results/cub_randint_ablation",
)

CUB_EMB_ABLATION_RESULTS_DIR = "results/cub_emb_size_ablation/"

rc('text', usetex=(LATEX_SYMBOL == "$"))
plt.style.use('seaborn-whitegrid')

# %% [markdown]
# Load Model Configs

# %% [code]
from collections import defaultdict
cub_configs = defaultdict(dict)
for file in os.listdir(CUB_RESULTS_DIR):
    if '_experiment_config.joblib' in file:
        config = load(os.path.join(CUB_RESULTS_DIR, file))
        fold = int(file[file.find("_fold_") + len("_fold_"):file.find("_experiment_config")]) - 1
        if "Sequential" in file:
            extra = "Sequential"
        elif "Independent" in file:
            extra = "Independent"
        else:
            extra = ""
            
        model_name = f"{extra}{config['architecture']}{config.get('extra_name', '')}"
        cub_configs[str(fold)][model_name] = config

print("CUB Model names:")
for model_name, _ in cub_configs['0'].items(): 
    print("\t", model_name)

# %% [markdown]
# See Selected Attributes for CUB

# %% [code]
selected_attributes = [
    1,
    4,
    6,
    7,
    10,
    14,
    15,
    20,
    21,
    23,
    25,
    29,
    30,
    35,
    36,
    38,
    40,
    44,
    45,
    50,
    51,
    53,
    54,
    56,
    57,
    59,
    63,
    64,
    69,
    70,
    72,
    75,
    80,
    84,
    90,
    91,
    93,
    99,
    101,
    106,
    110,
    111,
    116,
    117,
    119,
    125,
    126,
    131,
    132,
    134,
    145,
    149,
    151,
    152,
    153,
    157,
    158,
    163,
    164,
    168,
    172,
    178,
    179,
    181,
    183,
    187,
    188,
    193,
    194,
    196,
    198,
    202,
    203,
    208,
    209,
    211,
    212,
    213,
    218,
    220,
    221,
    225,
    235,
    236,
    238,
    239,
    240,
    242,
    243,
    244,
    249,
    253,
    254,
    259,
    260,
    262,
    268,
    274,
    277,
    283,
    289,
    292,
    293,
    294,
    298,
    299,
    304,
    305,
    308,
    309,
    310,
    311,
]

# %% [code]
attributes = [
    "has_bill_shape::curved_(up_or_down)",
    "has_bill_shape::dagger",
    "has_bill_shape::hooked",
    "has_bill_shape::needle",
    "has_bill_shape::hooked_seabird",
    "has_bill_shape::spatulate",
    "has_bill_shape::all-purpose",
    "has_bill_shape::cone",
    "has_bill_shape::specialized",
    "has_wing_color::blue",
    "has_wing_color::brown",
    "has_wing_color::iridescent",
    "has_wing_color::purple",
    "has_wing_color::rufous",
    "has_wing_color::grey",
    "has_wing_color::yellow",
    "has_wing_color::olive",
    "has_wing_color::green",
    "has_wing_color::pink",
    "has_wing_color::orange",
    "has_wing_color::black",
    "has_wing_color::white",
    "has_wing_color::red",
    "has_wing_color::buff",
    "has_upperparts_color::blue",
    "has_upperparts_color::brown",
    "has_upperparts_color::iridescent",
    "has_upperparts_color::purple",
    "has_upperparts_color::rufous",
    "has_upperparts_color::grey",
    "has_upperparts_color::yellow",
    "has_upperparts_color::olive",
    "has_upperparts_color::green",
    "has_upperparts_color::pink",
    "has_upperparts_color::orange",
    "has_upperparts_color::black",
    "has_upperparts_color::white",
    "has_upperparts_color::red",
    "has_upperparts_color::buff",
    "has_underparts_color::blue",
    "has_underparts_color::brown",
    "has_underparts_color::iridescent",
    "has_underparts_color::purple",
    "has_underparts_color::rufous",
    "has_underparts_color::grey",
    "has_underparts_color::yellow",
    "has_underparts_color::olive",
    "has_underparts_color::green",
    "has_underparts_color::pink",
    "has_underparts_color::orange",
    "has_underparts_color::black",
    "has_underparts_color::white",
    "has_underparts_color::red",
    "has_underparts_color::buff",
    "has_breast_pattern::solid",
    "has_breast_pattern::spotted",
    "has_breast_pattern::striped",
    "has_breast_pattern::multi-colored",
    "has_back_color::blue",
    "has_back_color::brown",
    "has_back_color::iridescent",
    "has_back_color::purple",
    "has_back_color::rufous",
    "has_back_color::grey",
    "has_back_color::yellow",
    "has_back_color::olive",
    "has_back_color::green",
    "has_back_color::pink",
    "has_back_color::orange",
    "has_back_color::black",
    "has_back_color::white",
    "has_back_color::red",
    "has_back_color::buff",
    "has_tail_shape::forked_tail",
    "has_tail_shape::rounded_tail",
    "has_tail_shape::notched_tail",
    "has_tail_shape::fan-shaped_tail",
    "has_tail_shape::pointed_tail",
    "has_tail_shape::squared_tail",
    "has_upper_tail_color::blue",
    "has_upper_tail_color::brown",
    "has_upper_tail_color::iridescent",
    "has_upper_tail_color::purple",
    "has_upper_tail_color::rufous",
    "has_upper_tail_color::grey",
    "has_upper_tail_color::yellow",
    "has_upper_tail_color::olive",
    "has_upper_tail_color::green",
    "has_upper_tail_color::pink",
    "has_upper_tail_color::orange",
    "has_upper_tail_color::black",
    "has_upper_tail_color::white",
    "has_upper_tail_color::red",
    "has_upper_tail_color::buff",
    "has_head_pattern::spotted",
    "has_head_pattern::malar",
    "has_head_pattern::crested",
    "has_head_pattern::masked",
    "has_head_pattern::unique_pattern",
    "has_head_pattern::eyebrow",
    "has_head_pattern::eyering",
    "has_head_pattern::plain",
    "has_head_pattern::eyeline",
    "has_head_pattern::striped",
    "has_head_pattern::capped",
    "has_breast_color::blue",
    "has_breast_color::brown",
    "has_breast_color::iridescent",
    "has_breast_color::purple",
    "has_breast_color::rufous",
    "has_breast_color::grey",
    "has_breast_color::yellow",
    "has_breast_color::olive",
    "has_breast_color::green",
    "has_breast_color::pink",
    "has_breast_color::orange",
    "has_breast_color::black",
    "has_breast_color::white",
    "has_breast_color::red",
    "has_breast_color::buff",
    "has_throat_color::blue",
    "has_throat_color::brown",
    "has_throat_color::iridescent",
    "has_throat_color::purple",
    "has_throat_color::rufous",
    "has_throat_color::grey",
    "has_throat_color::yellow",
    "has_throat_color::olive",
    "has_throat_color::green",
    "has_throat_color::pink",
    "has_throat_color::orange",
    "has_throat_color::black",
    "has_throat_color::white",
    "has_throat_color::red",
    "has_throat_color::buff",
    "has_eye_color::blue",
    "has_eye_color::brown",
    "has_eye_color::purple",
    "has_eye_color::rufous",
    "has_eye_color::grey",
    "has_eye_color::yellow",
    "has_eye_color::olive",
    "has_eye_color::green",
    "has_eye_color::pink",
    "has_eye_color::orange",
    "has_eye_color::black",
    "has_eye_color::white",
    "has_eye_color::red",
    "has_eye_color::buff",
    "has_bill_length::about_the_same_as_head",
    "has_bill_length::longer_than_head",
    "has_bill_length::shorter_than_head",
    "has_forehead_color::blue",
    "has_forehead_color::brown",
    "has_forehead_color::iridescent",
    "has_forehead_color::purple",
    "has_forehead_color::rufous",
    "has_forehead_color::grey",
    "has_forehead_color::yellow",
    "has_forehead_color::olive",
    "has_forehead_color::green",
    "has_forehead_color::pink",
    "has_forehead_color::orange",
    "has_forehead_color::black",
    "has_forehead_color::white",
    "has_forehead_color::red",
    "has_forehead_color::buff",
    "has_under_tail_color::blue",
    "has_under_tail_color::brown",
    "has_under_tail_color::iridescent",
    "has_under_tail_color::purple",
    "has_under_tail_color::rufous",
    "has_under_tail_color::grey",
    "has_under_tail_color::yellow",
    "has_under_tail_color::olive",
    "has_under_tail_color::green",
    "has_under_tail_color::pink",
    "has_under_tail_color::orange",
    "has_under_tail_color::black",
    "has_under_tail_color::white",
    "has_under_tail_color::red",
    "has_under_tail_color::buff",
    "has_nape_color::blue",
    "has_nape_color::brown",
    "has_nape_color::iridescent",
    "has_nape_color::purple",
    "has_nape_color::rufous",
    "has_nape_color::grey",
    "has_nape_color::yellow",
    "has_nape_color::olive",
    "has_nape_color::green",
    "has_nape_color::pink",
    "has_nape_color::orange",
    "has_nape_color::black",
    "has_nape_color::white",
    "has_nape_color::red",
    "has_nape_color::buff",
    "has_belly_color::blue",
    "has_belly_color::brown",
    "has_belly_color::iridescent",
    "has_belly_color::purple",
    "has_belly_color::rufous",
    "has_belly_color::grey",
    "has_belly_color::yellow",
    "has_belly_color::olive",
    "has_belly_color::green",
    "has_belly_color::pink",
    "has_belly_color::orange",
    "has_belly_color::black",
    "has_belly_color::white",
    "has_belly_color::red",
    "has_belly_color::buff",
    "has_wing_shape::rounded-wings",
    "has_wing_shape::pointed-wings",
    "has_wing_shape::broad-wings",
    "has_wing_shape::tapered-wings",
    "has_wing_shape::long-wings",
    "has_size::large_(16_-_32_in)",
    "has_size::small_(5_-_9_in)",
    "has_size::very_large_(32_-_72_in)",
    "has_size::medium_(9_-_16_in)",
    "has_size::very_small_(3_-_5_in)",
    "has_shape::upright-perching_water-like",
    "has_shape::chicken-like-marsh",
    "has_shape::long-legged-like",
    "has_shape::duck-like",
    "has_shape::owl-like",
    "has_shape::gull-like",
    "has_shape::hummingbird-like",
    "has_shape::pigeon-like",
    "has_shape::tree-clinging-like",
    "has_shape::hawk-like",
    "has_shape::sandpiper-like",
    "has_shape::upland-ground-like",
    "has_shape::swallow-like",
    "has_shape::perching-like",
    "has_back_pattern::solid",
    "has_back_pattern::spotted",
    "has_back_pattern::striped",
    "has_back_pattern::multi-colored",
    "has_tail_pattern::solid",
    "has_tail_pattern::spotted",
    "has_tail_pattern::striped",
    "has_tail_pattern::multi-colored",
    "has_belly_pattern::solid",
    "has_belly_pattern::spotted",
    "has_belly_pattern::striped",
    "has_belly_pattern::multi-colored",
    "has_primary_color::blue",
    "has_primary_color::brown",
    "has_primary_color::iridescent",
    "has_primary_color::purple",
    "has_primary_color::rufous",
    "has_primary_color::grey",
    "has_primary_color::yellow",
    "has_primary_color::olive",
    "has_primary_color::green",
    "has_primary_color::pink",
    "has_primary_color::orange",
    "has_primary_color::black",
    "has_primary_color::white",
    "has_primary_color::red",
    "has_primary_color::buff",
    "has_leg_color::blue",
    "has_leg_color::brown",
    "has_leg_color::iridescent",
    "has_leg_color::purple",
    "has_leg_color::rufous",
    "has_leg_color::grey",
    "has_leg_color::yellow",
    "has_leg_color::olive",
    "has_leg_color::green",
    "has_leg_color::pink",
    "has_leg_color::orange",
    "has_leg_color::black",
    "has_leg_color::white",
    "has_leg_color::red",
    "has_leg_color::buff",
    "has_bill_color::blue",
    "has_bill_color::brown",
    "has_bill_color::iridescent",
    "has_bill_color::purple",
    "has_bill_color::rufous",
    "has_bill_color::grey",
    "has_bill_color::yellow",
    "has_bill_color::olive",
    "has_bill_color::green",
    "has_bill_color::pink",
    "has_bill_color::orange",
    "has_bill_color::black",
    "has_bill_color::white",
    "has_bill_color::red",
    "has_bill_color::buff",
    "has_crown_color::blue",
    "has_crown_color::brown",
    "has_crown_color::iridescent",
    "has_crown_color::purple",
    "has_crown_color::rufous",
    "has_crown_color::grey",
    "has_crown_color::yellow",
    "has_crown_color::olive",
    "has_crown_color::green",
    "has_crown_color::pink",
    "has_crown_color::orange",
    "has_crown_color::black",
    "has_crown_color::white",
    "has_crown_color::red",
    "has_crown_color::buff",
    "has_wing_pattern::solid",
    "has_wing_pattern::spotted",
    "has_wing_pattern::striped",
    "has_wing_pattern::multi-colored",
]
selected_attribute_names = list(np.array(attributes)[selected_attributes])

# %% [markdown]
# Load the data

# %% [code]
seed_everything(42)
N_CONCEPTS, N_TASKS = 112, 200
og_config = cub_configs['0']['MixtureEmbModelSharedProb_AdaptiveDropout_NoProbConcat']
if og_config['weight_loss']:
    imbalance = find_class_imbalance(os.path.join(cub.BASE_DIR, 'train.pkl'), True)
else:
    imbalance = None
sampling_percent = og_config.get("sampling_percent", 1)
if sampling_percent != 1:
    # Do the subsampling
    new_n_concepts = int(np.ceil(N_CONCEPTS * sampling_percent))
    selected_concepts_file = os.path.join(
        CUB_RESULTS_DIR,
        f"selected_concepts_sampling_{sampling_percent}.npy",
    )
    selected_concepts = np.load(selected_concepts_file)
    print("\t\tSelected concepts:", selected_concepts)
    def subsample_transform(sample):
        if isinstance(sample, list):
            sample = np.array(sample)
        return sample[selected_concepts]

    if og_config['weight_loss']:
        imbalance = np.array(imbalance)[selected_concepts]

    train_dl = load_data(
        pkl_paths=[os.path.join(cub.BASE_DIR, 'train.pkl')],
        use_attr=True,
        no_img=False,
        batch_size=og_config['batch_size'],
        uncertain_label=False,
        n_class_attr=2,
        image_dir='images',
        resampling=False,
        root_dir=cub.CUB_DIR,
        num_workers=NUM_WORKERS,
        concept_transform=subsample_transform,
    )
    test_dl = load_data(
        pkl_paths=[os.path.join(cub.BASE_DIR, 'test.pkl')],
        use_attr=True,
        no_img=False,
        batch_size=og_config['batch_size'],
        uncertain_label=False,
        n_class_attr=2,
        image_dir='images',
        resampling=False,
        root_dir=cub.CUB_DIR,
        num_workers=NUM_WORKERS,
        concept_transform=subsample_transform,
    )

    # And set the right number of concepts to be used
    N_CONCEPTS = new_n_concepts
else:
    selected_concepts = list(range(N_CONCEPTS))
    train_dl = load_data(
        pkl_paths=[os.path.join(cub.BASE_DIR, 'train.pkl')],
        use_attr=True,
        no_img=False,
        batch_size=og_config['batch_size'],
        uncertain_label=False,
        n_class_attr=2,
        image_dir='images',
        resampling=False,
        root_dir=cub.CUB_DIR,
        num_workers=NUM_WORKERS,
    )
    test_dl = load_data(
        pkl_paths=[os.path.join(cub.BASE_DIR, 'test.pkl')],
        use_attr=True,
        no_img=False,
        batch_size=og_config['batch_size'],
        uncertain_label=False,
        n_class_attr=2,
        image_dir='images',
        resampling=False,
        root_dir=cub.CUB_DIR,
        num_workers=NUM_WORKERS,
    )

total_c = []
for (_, _, c) in train_dl:
    total_c.append(c.cpu().detach())
total_c = np.concatenate(total_c, axis=0)
concept_corr_matrix = np.corrcoef(total_c.T)

# %% [code]
concept_group_map = defaultdict(list)
for i, concept_name in enumerate(np.array(selected_attribute_names)[selected_concepts]):
    group = concept_name[:concept_name.find("::")]
    concept_group_map[group].append(i)
concept_group_map

# %% [markdown]
# Load CUB Models

# %% [code]
def load_cub_model(
    config,
    n_tasks=N_TASKS,
    result_dir=CUB_RESULTS_DIR,
    n_concepts=N_CONCEPTS,
    split=0,
    imbalance=None,
    intervention_idxs=None,
    adversarial_intervention=False,
    train_dl=None,
    sequential=False,
    independent=False,
):
    if split is not None:
        full_run_name = f"{config['architecture']}{config.get('extra_name', '')}_{config['c_extractor_arch']}_fold_{split + 1}"
    else:
        full_run_name = f"{config['architecture']}{config.get('extra_name', '')}_{config['c_extractor_arch']}"
    selected_concepts = np.arange(n_concepts)
    if config.get("message_passing_layers"):
        edges = []
        edge_weights = []
        corr_thresh = config.get('corr_thresh')
        sorted_selected = sorted(selected_concepts)
        for i in range(n_concepts):
            i_idx = sorted_selected[i]
            for j in range(i + 1, n_concepts):
                j_idx = sorted_selected[j]
                if np.abs(concept_corr_matrix[i_idx, j_idx]) >= corr_thresh:
                    edges.append(np.array([[i, j], [j, i]]))
                    if config.get("weighted_edges"):
                        weight = np.abs(concept_corr_matrix[i_idx, j_idx])
                    else:
                        weight = 1
                    edge_weights.extend([weight, weight])
        concept_edge_list = torch.cuda.LongTensor(np.concatenate(edges, axis=-1))
        concept_edge_weights = torch.cuda.FloatTensor(np.array(edge_weights))
    else:
        concept_edge_list = None
        concept_edge_weights = None
    if (
        (intervention_idxs is not None) and
        (train_dl is not None) and
        (config['architecture'] == "ConceptBottleneckModel") and
        (not config.get('sigmoidal_prob', True))
    ):
        # Then let's look at the empirical distribution of the logits in order to
        # be able to intervene
        model = models.construct_model(
            n_concepts=n_concepts,
            n_tasks=n_tasks,
            config=config,
            imbalance=imbalance,
            concept_edge_list=concept_edge_list,
            concept_edge_weights=concept_edge_weights,
        )
        trainer = pl.Trainer(
            gpus=GPU,
        )
        batch_results = trainer.predict(model, train_dl)
        out_embs = np.concatenate(
            list(map(lambda x: x[1], batch_results)),
            axis=0,
        )
        active_intervention_values = []
        inactive_intervention_values = []
        for idx in range(n_concepts):
            active_intervention_values.append(np.percentile(out_embs[:, idx], 95))
            inactive_intervention_values.append(np.percentile(out_embs[:, idx], 5))
        active_intervention_values = torch.cuda.FloatTensor(active_intervention_values)
        inactive_intervention_values = torch.cuda.FloatTensor(inactive_intervention_values)
    else:
        active_intervention_values = inactive_intervention_values = None
    
    if sequential:
        _, c2y_model = models.construct_sequential_models(
            n_concepts=n_concepts,
            n_tasks=n_tasks,
            config=config,
            imbalance=imbalance,
        )
    elif independent:
        _, c2y_model = models.construct_sequential_models(
            n_concepts=n_concepts,
            n_tasks=n_tasks,
            config=config,
            imbalance=imbalance,
        )
    else:
        c2y_model = None
    model = models.construct_model(
        n_concepts=n_concepts,
        n_tasks=n_tasks,
        config=config,
        imbalance=imbalance,
        concept_edge_list=concept_edge_list,
        concept_edge_weights=concept_edge_weights,
        intervention_idxs=intervention_idxs,
        adversarial_intervention=adversarial_intervention,
        active_intervention_values=active_intervention_values,
        inactive_intervention_values=inactive_intervention_values,
        c2y_model=c2y_model,
    )
    print("sequential =", sequential)
    print("independent =", independent)
    if sequential:
        extra = "Sequential"
    elif independent:
        extra = "Independent"
    else:
        extra = ""
    print("extra =", extra)
    model_saved_path = os.path.join(
        result_dir or ".",
        f'{extra}{full_run_name}.pt'
    )
    model.load_state_dict(torch.load(model_saved_path))
    return model

# %% [markdown]
## Test interventions for all models in CUB

# %% [code]
import joblib
if os.path.exists(
    os.path.join("results/cub_intervention", f'total_y_accs.joblib')
):
    total_y_accs = joblib.load(os.path.join("results/cub_intervention", f'total_y_accs.joblib'))
    total_c_accs = joblib.load(os.path.join("results/cub_intervention", f'total_c_accs.joblib'))
else:
    total_y_accs = []
    total_c_accs = []

# %% [code]
import models_cub
reload(cub)
reload(models_cub)

WHITELIST = [
    "ConceptBottleneckModelFuzzy",
    "ConceptBottleneckModelBool",
    "SequentialConceptBottleneckModel",
    "IndependentConceptBottleneckModel",
    "ConceptBottleneckModelFuzzyExtraCapacity_Logit",
    'MixtureEmbModelSharedProb_AdaptiveDropout_NoProbConcat',
    'MixtureEmbModelSharedProb_Adaptive_NoProbConcat',
]

# for j, num_groups_intervened in enumerate(range(0, len(concept_group_map) + 1, 4)):
groups = list(range(0, len(concept_group_map) + 1, 4))
for j, num_groups_intervened in enumerate(groups):
    while len(total_y_accs) <= j:
        total_y_accs.append(defaultdict(list))
        total_c_accs.append(defaultdict(list))
    intervention_y_accs = total_y_accs[j]
    c_accs = total_c_accs[j]
    print("Intervening with", num_groups_intervened, "our of", len(concept_group_map), "concept groups")
    for split, runs in cub_configs.items():
        selected_groups_for_split = np.random.choice(
            list(concept_group_map.keys()),
            size=num_groups_intervened,
            replace=False,
        )
        intervention_idxs = []
        for selected_group in selected_groups_for_split:
            intervention_idxs.extend(concept_group_map[selected_group])
        intervention_idxs = sorted(intervention_idxs)
        print("\tFor fold", split, "we will intervene on groups", selected_groups_for_split)
        print("\t\tThis results in concepts", intervention_idxs, "being modified")
        for model_name, config in runs.items(): 
            config["shared_prob_gen"] = config.get("shared_prob_gen", False)
            config["per_concept_weight"] = config.get("per_concept_weight", False)
            if (model_name not in WHITELIST) or ("NoConceptSupervision" in model_name):
                continue
            if (model_name in intervention_y_accs) and len(intervention_y_accs[model_name]) >= (int(split) + 1):
                print("\tSkipping", model_name, "as it was found in cached results")
                continue
            print("Computing for", model_name)
            model = load_cub_model(
                config=config,
                n_tasks=N_TASKS,
                n_concepts=N_CONCEPTS,
                result_dir=CUB_RESULTS_DIR,
                split=int(split),
                imbalance=imbalance,
                intervention_idxs=intervention_idxs,
                train_dl=train_dl,
                sequential=("Sequential" in model_name),
                independent=("Independent" in model_name),
            )
            trainer = pl.Trainer(
                gpus=GPU,
            )
            [test_results] = trainer.test(model, test_dl, verbose=False,)
            print("\tFor model:", model_name, f"(fold {split}) intervening with", num_groups_intervened, "gives:")
            print("\t\tTest task accuracy:", test_results['test_y_accuracy'])
            intervention_y_accs[model_name].append(test_results['test_y_accuracy'])
            print("\t\tOriginal concept accuracy:", test_results['test_c_accuracy'])
            c_accs[model_name].append(test_results['test_c_accuracy'])


# %% [code]
import joblib
joblib.dump(total_y_accs, os.path.join("results/cub_intervention", f'total_y_accs.joblib'))
joblib.dump(groups, os.path.join("results/cub_intervention", f'groups.joblib'))
joblib.dump(total_c_accs, os.path.join("results/cub_intervention", f'total_c_accs.joblib'))

# %% [code]
y_acc_means = [
    {
        method: np.mean(vals)
        for method, vals in results.items()
    } for results in total_y_accs
]
y_acc_stds = [
    {
        method: np.std(vals)
        for method, vals in results.items()
    } for results in total_y_accs
]
method_names = list(y_acc_means[-1].keys())
print(y_acc_means[-1])

x_vals = groups
fig, ax = plt.subplots(figsize=(6, 4))
clrs = sns.color_palette("colorblind", 30)
color_map = {
    'No Concepts': clrs[1],
    'Bool': clrs[2],
    'Fuzzy': clrs[5],
    'Hybrid': clrs[6],
    'Isolated Concept Embeddings (ours)': clrs[9],
    "Isolated Concept Embeddings + RandInt (ours)": clrs[10],
    "MixCEM + RandInt (ours)": clrs[3],
    "MixCEM (ours)": clrs[4],
}
method_to_actual_name = {
    'ConceptBottleneckModelBool': 'Bool',
    'ConceptBottleneckModelFuzzy': 'Fuzzy',
    "SequentialConceptBottleneckModel": "Sequential-CBM",
    "IndependentConceptBottleneckModel": "Independent-CBM",
    'ConceptBottleneckModelFuzzyExtraCapacity_Logit': 'Hybrid',
    'MixtureEmbModelSharedProb_AdaptiveDropout_NoProbConcat': "MixCEM + RandInt (ours)",
    'MixtureEmbModelSharedProb_Adaptive_NoProbConcat': "MixCEM (ours)",
}

for method_name in method_names:
    print(method_name)
    if method_name not in method_to_actual_name:
        continue
    means = np.array([item[method_name] * 100 for item in y_acc_means])
    stds = np.array([item[method_name] * 100 for item in y_acc_stds])
    method_name = method_to_actual_name.get(method_name, method_name)
    if method_name not in color_map:
        color_map[method_name] = clrs[len(color_map)]
    color = color_map[method_name]
    ax.plot(
        x_vals,
        means,
        c=color,
        zorder=1,
    )
    ax.scatter(
        x_vals,
        means,
        s=50,
        label=method_name,
        color=color,
        zorder=2,
        marker='x' if "ours" in method_name else ".",
    )
    ax.fill_between(
        x_vals,
        means - stds,
        means + stds,
        alpha=0.3,
        facecolor=color,
    )

ax.set_xlabel("Concept Groups Intervened", fontsize=20)
ax.set_ylabel("Task Accuracy (%)", fontsize=20)

ax.grid(False)
handles, labels = ax.get_legend_handles_labels()
plt.title('CUB Concept Intervention', fontsize=25)
lgd = fig.legend(handles, labels, fontsize=15, loc='upper center', bbox_to_anchor=(0.5,-0.001), ncol=2) #(num_models - 1)//3)

plt.show()

# %% [markdown]
## Test incorrect interventions in CUB

# %% [code]
import joblib
if os.path.exists(
    os.path.join("results/cub_intervention", f'adversarial_total_y_accs.joblib')
):
    adversarial_total_y_accs = joblib.load(os.path.join("results/cub_intervention", f'adversarial_total_y_accs.joblib'))
else:
    adversarial_total_y_accs = []


# %% [code]
import models_cub
reload(cub)
reload(models_cub)

groups = list(range(0, len(concept_group_map) + 1, 4))
for j, num_groups_intervened in enumerate(groups):
    while len(adversarial_total_y_accs) <= j:
        adversarial_total_y_accs.append(defaultdict(list))
    intervention_y_accs = adversarial_total_y_accs[j]
    print("Intervening with", num_groups_intervened, "our of", len(concept_group_map), "concept groups")
    for split, runs in cub_configs.items():
        selected_groups_for_split = np.random.choice(
            list(concept_group_map.keys()),
            size=num_groups_intervened,
            replace=False,
        )
        intervention_idxs = []
        for selected_group in selected_groups_for_split:
            intervention_idxs.extend(concept_group_map[selected_group])
        intervention_idxs = sorted(intervention_idxs)
        print("\tFor fold", split, "we will intervene on groups", selected_groups_for_split)
        print("\t\tThis results in concepts", intervention_idxs, "being modified")
        for model_name, config in runs.items(): 
            config["shared_prob_gen"] = config.get("shared_prob_gen", False)
            config["per_concept_weight"] = config.get("per_concept_weight", False)
            if (model_name not in WHITELIST) or ("NoConceptSupervision" in model_name):
                continue
            if (model_name in intervention_y_accs) and len(intervention_y_accs[model_name]) >= (int(split) + 1):
                print("\tSkipping", model_name, "as it was found in cached results")
                continue
            model = load_cub_model(
                config=config,
                n_tasks=N_TASKS,
                n_concepts=N_CONCEPTS,
                result_dir=CUB_RESULTS_DIR,
                split=int(split),
                imbalance=imbalance,
                intervention_idxs=intervention_idxs,
                train_dl=train_dl,
                adversarial_intervention=True,
                sequential=("Sequential" in model_name),
                independent=("Independent" in model_name),
            )
            trainer = pl.Trainer(
                gpus=GPU,
            )
            [test_results] = trainer.test(model, test_dl, verbose=False,)
            print("\tFor model:", model_name, f"(fold {split}) intervening with", num_groups_intervened, "gives:")
            print("\t\tTest task accuracy:", test_results['test_y_accuracy'])
            intervention_y_accs[model_name].append(test_results['test_y_accuracy'])
            print("\t\tOriginal concept accuracy:", test_results['test_c_accuracy'])


# %% [code]
import joblib
joblib.dump(
    adversarial_total_y_accs,
    os.path.join("results/cub_intervention", f'adversarial_total_y_accs.joblib'),
)

# %% [code]
y_acc_means = [
    {
        method: np.mean(vals)
        for method, vals in results.items()
    } for results in adversarial_total_y_accs
]
y_acc_stds = [
    {
        method: np.std(vals)
        for method, vals in results.items()
    } for results in adversarial_total_y_accs
]
method_names = list(y_acc_means[-1].keys())
print(y_acc_means[-1])

x_vals = groups
fig, ax = plt.subplots(figsize=(6, 4))
clrs = sns.color_palette("colorblind", 30)
color_map = {
    'No Concepts': clrs[1],
    'Bool': clrs[2],
    'Fuzzy': clrs[5],
    'Hybrid': clrs[6],
    'Isolated Concept Embeddings (ours)': clrs[9],
    "Isolated Concept Embeddings + RandInt (ours)": clrs[10],
    "MixCEM + RandInt (ours)": clrs[3],
    "MixCEM (ours)": clrs[4],
}
method_to_actual_name = {
    'ConceptBottleneckModelBool': 'Bool',
    'ConceptBottleneckModelFuzzy': 'Fuzzy',
    "SequentialConceptBottleneckModel": "Sequential-CBM",
    "IndependentConceptBottleneckModel": "Independent-CBM",
    'ConceptBottleneckModelFuzzyExtraCapacity_Logit': 'Hybrid',
    'MixtureEmbModelSharedProb_AdaptiveDropout_NoProbConcat': "MixCEM + RandInt (ours)",
    'MixtureEmbModelSharedProb_Adaptive_NoProbConcat': "MixCEM (ours)",
}

for method_name in method_names:
    print(method_name)
    if method_name not in method_to_actual_name:
        continue
    means = np.array([item[method_name] * 100 for item in y_acc_means])
    stds = np.array([item[method_name] * 100 for item in y_acc_stds])
    method_name = method_to_actual_name.get(method_name, method_name)
    if method_name not in color_map:
        color_map[method_name] = clrs[len(color_map)]
    color = color_map[method_name]
    ax.plot(
        x_vals,
        means,
        c=color,
        zorder=1,
    )
    ax.scatter(
        x_vals,
        means,
        s=50,
        label=method_name,
        color=color,
        zorder=2,
        marker='x' if "ours" in method_name else ".",
    )
    ax.fill_between(
        x_vals,
        means - stds,
        means + stds,
        alpha=0.3,
        facecolor=color,
    )

ax.set_xlabel("Concept Groups Incorrectly Intervened", fontsize=20)
ax.set_ylabel("Task Accuracy (%)", fontsize=20)

ax.grid(False)
handles, labels = ax.get_legend_handles_labels()
plt.title('CUB Incorrect Concept Intervention', fontsize=25)
lgd = fig.legend(handles, labels, fontsize=15, loc='upper center', bbox_to_anchor=(0.5,-0.001), ncol=2) #(num_models - 1)//3)

plt.show()

# %% [markdown]
# And let's look at how interventions change as the probability of train-time intervention varies

# %% [code]
import joblib
if os.path.exists(
    os.path.join("results/cub_intervention", f'prob_ablation_total_y_accs.joblib')
):
    prob_ablation_total_y_accs = joblib.load(os.path.join("results/cub_intervention", f'prob_ablation_total_y_accs.joblib'))
else:
    prob_ablation_total_y_accs = defaultdict(lambda: defaultdict(list))


# %% [code]
import models_cub
reload(cub)
reload(models_cub)

prob_ablation_configs = defaultdict(dict)
for file in os.listdir(CUB_ABLATION_RESULTS_DIR):
    if '_experiment_config.joblib' in file:
        config = load(os.path.join(CUB_ABLATION_RESULTS_DIR, file))
        fold = int(file[file.find("_fold_") + len("_fold_"):file.find("_experiment_config")]) - 1
        model_name = f"{config['architecture']}{config.get('extra_name', '')}"
        prob_ablation_configs[str(fold)][model_name] = config
print("CUB Prob Ablation Model names:")
for model_name, _ in prob_ablation_configs['0'].items(): 
    print("\t", model_name)
    

WHITELIST = [
    'MixtureEmbModelSharedProb_AdaptiveDropout_NoProbConcat',
]


splits = sorted(prob_ablation_configs.keys())

for split in splits:
    runs = prob_ablation_configs[split]
    for num_groups_intervened in [
        int(len(concept_group_map) * 0.25),
        int(len(concept_group_map) * 0.5),
        int(len(concept_group_map) * 0.75),
        len(concept_group_map),
    ]:
        selected_groups_for_split = np.random.choice(
            list(concept_group_map.keys()),
            size=num_groups_intervened,
            replace=False,
        )
        intervention_idxs = []
        for selected_group in selected_groups_for_split:
            intervention_idxs.extend(concept_group_map[selected_group])
        intervention_idxs = sorted(intervention_idxs)
        print("\tFor fold", int(split) + 1, "we will intervene on groups", selected_groups_for_split)
        print("\t\tThis results in concepts", intervention_idxs, "being modified")
        for model_name, config in runs.items(): 
            config["shared_prob_gen"] = config.get("shared_prob_gen", False)
            config["per_concept_weight"] = config.get("per_concept_weight", False)
            if ("MixtureEmbModelSharedProb_AdaptiveDropout_NoProbConcat" not in model_name):
                print("Skipping", model_name)
                continue
            model = load_cub_model(
                config=config,
                n_tasks=N_TASKS,
                n_concepts=N_CONCEPTS,
                result_dir=CUB_ABLATION_RESULTS_DIR,
                split=int(split),
                imbalance=imbalance,
                intervention_idxs=intervention_idxs,
                train_dl=train_dl,
            )
            trainer = pl.Trainer(
                gpus=GPU,
            )
            [test_results] = trainer.test(model, test_dl, verbose=False,)
            print(
                "\tFor model:", model_name, f"(fold {split} trained with prob {config['training_intervention_prob']})",
                "intervening with", num_groups_intervened, "gives:"
            )
            print("\t\tTest task accuracy:", test_results['test_y_accuracy'])
            prob_ablation_total_y_accs[model_name][config['training_intervention_prob']].append(
                test_results['test_y_accuracy']
            )
            print("\t\tOriginal concept accuracy:", test_results['test_c_accuracy'])


# %% [code]
import joblib
joblib.dump(
    prob_ablation_total_y_accs,
    os.path.join("results/cub_intervention", f'prob_ablation_total_y_accs.joblib'),
)

# %% [markdown]
# Finally, let's see how the embedding size affects interventions

# %% [code]
import joblib
if os.path.exists(
    os.path.join("results/cub_intervention", f'emb_ablation_total_y_accs.joblib')
):
    emb_seen = joblib.load(os.path.join("results/cub_intervention", f'emb_ablation_seen.joblib'))
    emb_ablation_total_y_accs = joblib.load(os.path.join("results/cub_intervention", f'emb_ablation_total_y_accs.joblib'))
else:
    emb_ablation_total_y_accs = defaultdict(lambda: defaultdict(list))
    emb_seen = set()


# %% [code]
import models_cub
reload(cub)
reload(models_cub)

emb_ablation_configs = defaultdict(dict)
for file in os.listdir(CUB_EMB_ABLATION_RESULTS_DIR):
    if '_experiment_config.joblib' in file:
        config = load(os.path.join(CUB_EMB_ABLATION_RESULTS_DIR, file))
        fold = int(file[file.find("_fold_") + len("_fold_"):file.find("_experiment_config")]) - 1
        model_name = f"{config['architecture']}{config.get('extra_name', '')}"
        emb_ablation_configs[str(fold)][model_name] = config
print("CUB Emb Ablation Model names:")
for model_name, _ in emb_ablation_configs['0'].items(): 
    print("\t", model_name)

sub_selected_concepts = np.load(os.path.join(
    CUB_EMB_ABLATION_RESULTS_DIR,
    "selected_concepts_sampling_0.25.npy",
))

# Do the subsampling
print("\t\tSelected concepts:", selected_concepts)
def subsample_transform(sample):
    if isinstance(sample, list):
        sample = np.array(sample)
    return sample[sub_selected_concepts]

sub_test_dl = load_data(
    pkl_paths=[os.path.join(cub.BASE_DIR, 'test.pkl')],
    use_attr=True,
    no_img=False,
    batch_size=og_config['batch_size'],
    uncertain_label=False,
    n_class_attr=2,
    image_dir='images',
    resampling=False,
    root_dir=cub.CUB_DIR,
    num_workers=NUM_WORKERS,
    concept_transform=subsample_transform,
)

sub_selected_concept_group_map = defaultdict(list)
for i, concept_name in enumerate(np.array(selected_attribute_names)[selected_concepts][sub_selected_concepts]):
    group = concept_name[:concept_name.find("::")]
    sub_selected_concept_group_map[group].append(i)


WHITELIST = [
    "ConceptBottleneckModelFuzzyExtraCapacity_Logit",
    'MixtureEmbModelSharedProb_AdaptiveDropout_NoProbConcat',
    'MixtureEmbModelSharedProb_Adaptive_NoProbConcat',
]


splits = sorted(emb_ablation_configs.keys())

for split in splits:
    runs = emb_ablation_configs[split]
    model_names = sorted(runs.keys())
    for num_groups_intervened in [
        0,
        int(len(sub_selected_concept_group_map) * 0.25),
        int(len(sub_selected_concept_group_map) * 0.5),
        int(len(sub_selected_concept_group_map) * 0.75),
        len(sub_selected_concept_group_map),
    ]:
        selected_groups_for_split = np.random.choice(
            list(concept_group_map.keys()),
            size=num_groups_intervened,
            replace=False,
        )
        intervention_idxs = []
        for selected_group in selected_groups_for_split:
            intervention_idxs.extend(sub_selected_concept_group_map[selected_group])
        intervention_idxs = sorted(intervention_idxs)
        print("\tFor fold", int(split) + 1, "we will intervene on groups", selected_groups_for_split)
        print("\t\tThis results in concepts", intervention_idxs, "being modified")
        for model_name in model_names: 
            config = runs[model_name]
            config["shared_prob_gen"] = config.get("shared_prob_gen", False)
            config["per_concept_weight"] = config.get("per_concept_weight", False)
            print("model_name =", model_name)
            
            if "NoConceptSupervision" in model_name or (
                "ConceptBottleneckModelFuzzy" in model_name and config.get('extra_dims', 0) == 0
            ):
                continue
            if config["emb_size"] > 32:
                print("Skipping model", model_name, "as it has embedding size", config["emb_size"])
                continue
            key = (model_name, split, num_groups_intervened, config["emb_size"])
            if key in emb_seen:
                print("Skipping this as we have already seen it for", model_name)
                continue
            print("Loading model", model_name)
            model = load_cub_model(
                config=config,
                n_tasks=N_TASKS,
                n_concepts=len(sub_selected_concepts),
                result_dir=CUB_EMB_ABLATION_RESULTS_DIR,
                split=int(split),
                imbalance=np.array(imbalance)[sub_selected_concepts],
                intervention_idxs=intervention_idxs,
                train_dl=train_dl,
            )
            trainer = pl.Trainer(
                gpus=GPU,
            )
            [test_results] = trainer.test(model, sub_test_dl, verbose=False,)
            print(
                "\tFor model:", model_name, f"(fold {int(split) + 1} trained with emb {config['emb_size']})",
                "intervening with", num_groups_intervened, "gives:"
            )
            print("\t\tTest task accuracy:", test_results['test_y_accuracy'])
            emb_ablation_total_y_accs[model_name][config['emb_size']].append(
                test_results['test_y_accuracy']
            )
            emb_seen.add(key)
            print("\t\tOriginal concept accuracy:", test_results['test_c_accuracy'])


# %% [code]
import joblib
joblib.dump(
    emb_ablation_total_y_accs,
    os.path.join("results/cub_intervention", f'emb_ablation_total_y_accs.joblib'),
)
joblib.dump(emb_seen, os.path.join("results/cub_intervention", f'emb_ablation_seen.joblib'))
