# Supplementary material
Source: ML conference proceedings conference paper supplement (https://proceedings.neurips.cc/paper_files/paper/2022/hash/867c06823281e506e8059f5c13a57f75-Abstract.html)
Supplement: Supplementary file 1 [file 867c06823281e506e8059f5c13a57f75-Supplemental-Conference.zip › SupplementaryMaterial/code/core/cub_qualitative_results.ipynb]

# %% [markdown]
# Setup

# %% [code]
%load_ext autoreload
%load_ext tensorboard
%matplotlib inline

# %% [code]
import matplotlib
import numpy as np
import os
import random
import tensorflow as tf
import yaml
import matplotlib.pyplot as plt
import numpy as np
from matplotlib import rc
from matplotlib import cm
import seaborn as sns
from importlib import reload
from pathlib import Path
import sklearn
from tensorflow.keras.models import load_model
from joblib import dump, load
import pandas as pd
import cub_experiments as cub
import models
from CUB200.cub_loader import load_data, find_class_imbalance
import torch
import pytorch_lightning as pl

# %% [code]
################################################################################
## Global Variables Defining Experiment Flow
################################################################################

LATEX_SYMBOL = "$"
RESULTS_DIR = "results/"
CUB_RESULTS_DIR = os.path.join(
    RESULTS_DIR,
    "cub"
)
SPLIT_USED = 0
rc('text', usetex=(LATEX_SYMBOL == "$"))
plt.style.use('seaborn-whitegrid')

# %% [markdown]
# Load Model Configs

# %% [code]
from collections import defaultdict
normal_cub_configs = defaultdict(dict)
for file in os.listdir(CUB_RESULTS_DIR):
    if '_experiment_config.joblib' in file:
        config = load(os.path.join(CUB_RESULTS_DIR, file))
        fold = int(file[file.find("_fold_") + len("_fold_"):file.find("_experiment_config")]) - 1
        model_name = f"{config['architecture']}{config.get('extra_name', '')}"
        normal_cub_configs[str(fold)][model_name] = config

print("Normal Model names:")
for model_name, _ in normal_cub_configs["0"].items(): 
    print("\t", model_name)

# %% [markdown]
# See Selected Attributes for CUB

# %% [code]
selected_attributes = [
    1,
    4,
    6,
    7,
    10,
    14,
    15,
    20,
    21,
    23,
    25,
    29,
    30,
    35,
    36,
    38,
    40,
    44,
    45,
    50,
    51,
    53,
    54,
    56,
    57,
    59,
    63,
    64,
    69,
    70,
    72,
    75,
    80,
    84,
    90,
    91,
    93,
    99,
    101,
    106,
    110,
    111,
    116,
    117,
    119,
    125,
    126,
    131,
    132,
    134,
    145,
    149,
    151,
    152,
    153,
    157,
    158,
    163,
    164,
    168,
    172,
    178,
    179,
    181,
    183,
    187,
    188,
    193,
    194,
    196,
    198,
    202,
    203,
    208,
    209,
    211,
    212,
    213,
    218,
    220,
    221,
    225,
    235,
    236,
    238,
    239,
    240,
    242,
    243,
    244,
    249,
    253,
    254,
    259,
    260,
    262,
    268,
    274,
    277,
    283,
    289,
    292,
    293,
    294,
    298,
    299,
    304,
    305,
    308,
    309,
    310,
    311,
]

# %% [code]
attributes = [
    "has_bill_shape::curved_(up_or_down)",
    "has_bill_shape::dagger",
    "has_bill_shape::hooked",
    "has_bill_shape::needle",
    "has_bill_shape::hooked_seabird",
    "has_bill_shape::spatulate",
    "has_bill_shape::all-purpose",
    "has_bill_shape::cone",
    "has_bill_shape::specialized",
    "has_wing_color::blue",
    "has_wing_color::brown",
    "has_wing_color::iridescent",
    "has_wing_color::purple",
    "has_wing_color::rufous",
    "has_wing_color::grey",
    "has_wing_color::yellow",
    "has_wing_color::olive",
    "has_wing_color::green",
    "has_wing_color::pink",
    "has_wing_color::orange",
    "has_wing_color::black",
    "has_wing_color::white",
    "has_wing_color::red",
    "has_wing_color::buff",
    "has_upperparts_color::blue",
    "has_upperparts_color::brown",
    "has_upperparts_color::iridescent",
    "has_upperparts_color::purple",
    "has_upperparts_color::rufous",
    "has_upperparts_color::grey",
    "has_upperparts_color::yellow",
    "has_upperparts_color::olive",
    "has_upperparts_color::green",
    "has_upperparts_color::pink",
    "has_upperparts_color::orange",
    "has_upperparts_color::black",
    "has_upperparts_color::white",
    "has_upperparts_color::red",
    "has_upperparts_color::buff",
    "has_underparts_color::blue",
    "has_underparts_color::brown",
    "has_underparts_color::iridescent",
    "has_underparts_color::purple",
    "has_underparts_color::rufous",
    "has_underparts_color::grey",
    "has_underparts_color::yellow",
    "has_underparts_color::olive",
    "has_underparts_color::green",
    "has_underparts_color::pink",
    "has_underparts_color::orange",
    "has_underparts_color::black",
    "has_underparts_color::white",
    "has_underparts_color::red",
    "has_underparts_color::buff",
    "has_breast_pattern::solid",
    "has_breast_pattern::spotted",
    "has_breast_pattern::striped",
    "has_breast_pattern::multi-colored",
    "has_back_color::blue",
    "has_back_color::brown",
    "has_back_color::iridescent",
    "has_back_color::purple",
    "has_back_color::rufous",
    "has_back_color::grey",
    "has_back_color::yellow",
    "has_back_color::olive",
    "has_back_color::green",
    "has_back_color::pink",
    "has_back_color::orange",
    "has_back_color::black",
    "has_back_color::white",
    "has_back_color::red",
    "has_back_color::buff",
    "has_tail_shape::forked_tail",
    "has_tail_shape::rounded_tail",
    "has_tail_shape::notched_tail",
    "has_tail_shape::fan-shaped_tail",
    "has_tail_shape::pointed_tail",
    "has_tail_shape::squared_tail",
    "has_upper_tail_color::blue",
    "has_upper_tail_color::brown",
    "has_upper_tail_color::iridescent",
    "has_upper_tail_color::purple",
    "has_upper_tail_color::rufous",
    "has_upper_tail_color::grey",
    "has_upper_tail_color::yellow",
    "has_upper_tail_color::olive",
    "has_upper_tail_color::green",
    "has_upper_tail_color::pink",
    "has_upper_tail_color::orange",
    "has_upper_tail_color::black",
    "has_upper_tail_color::white",
    "has_upper_tail_color::red",
    "has_upper_tail_color::buff",
    "has_head_pattern::spotted",
    "has_head_pattern::malar",
    "has_head_pattern::crested",
    "has_head_pattern::masked",
    "has_head_pattern::unique_pattern",
    "has_head_pattern::eyebrow",
    "has_head_pattern::eyering",
    "has_head_pattern::plain",
    "has_head_pattern::eyeline",
    "has_head_pattern::striped",
    "has_head_pattern::capped",
    "has_breast_color::blue",
    "has_breast_color::brown",
    "has_breast_color::iridescent",
    "has_breast_color::purple",
    "has_breast_color::rufous",
    "has_breast_color::grey",
    "has_breast_color::yellow",
    "has_breast_color::olive",
    "has_breast_color::green",
    "has_breast_color::pink",
    "has_breast_color::orange",
    "has_breast_color::black",
    "has_breast_color::white",
    "has_breast_color::red",
    "has_breast_color::buff",
    "has_throat_color::blue",
    "has_throat_color::brown",
    "has_throat_color::iridescent",
    "has_throat_color::purple",
    "has_throat_color::rufous",
    "has_throat_color::grey",
    "has_throat_color::yellow",
    "has_throat_color::olive",
    "has_throat_color::green",
    "has_throat_color::pink",
    "has_throat_color::orange",
    "has_throat_color::black",
    "has_throat_color::white",
    "has_throat_color::red",
    "has_throat_color::buff",
    "has_eye_color::blue",
    "has_eye_color::brown",
    "has_eye_color::purple",
    "has_eye_color::rufous",
    "has_eye_color::grey",
    "has_eye_color::yellow",
    "has_eye_color::olive",
    "has_eye_color::green",
    "has_eye_color::pink",
    "has_eye_color::orange",
    "has_eye_color::black",
    "has_eye_color::white",
    "has_eye_color::red",
    "has_eye_color::buff",
    "has_bill_length::about_the_same_as_head",
    "has_bill_length::longer_than_head",
    "has_bill_length::shorter_than_head",
    "has_forehead_color::blue",
    "has_forehead_color::brown",
    "has_forehead_color::iridescent",
    "has_forehead_color::purple",
    "has_forehead_color::rufous",
    "has_forehead_color::grey",
    "has_forehead_color::yellow",
    "has_forehead_color::olive",
    "has_forehead_color::green",
    "has_forehead_color::pink",
    "has_forehead_color::orange",
    "has_forehead_color::black",
    "has_forehead_color::white",
    "has_forehead_color::red",
    "has_forehead_color::buff",
    "has_under_tail_color::blue",
    "has_under_tail_color::brown",
    "has_under_tail_color::iridescent",
    "has_under_tail_color::purple",
    "has_under_tail_color::rufous",
    "has_under_tail_color::grey",
    "has_under_tail_color::yellow",
    "has_under_tail_color::olive",
    "has_under_tail_color::green",
    "has_under_tail_color::pink",
    "has_under_tail_color::orange",
    "has_under_tail_color::black",
    "has_under_tail_color::white",
    "has_under_tail_color::red",
    "has_under_tail_color::buff",
    "has_nape_color::blue",
    "has_nape_color::brown",
    "has_nape_color::iridescent",
    "has_nape_color::purple",
    "has_nape_color::rufous",
    "has_nape_color::grey",
    "has_nape_color::yellow",
    "has_nape_color::olive",
    "has_nape_color::green",
    "has_nape_color::pink",
    "has_nape_color::orange",
    "has_nape_color::black",
    "has_nape_color::white",
    "has_nape_color::red",
    "has_nape_color::buff",
    "has_belly_color::blue",
    "has_belly_color::brown",
    "has_belly_color::iridescent",
    "has_belly_color::purple",
    "has_belly_color::rufous",
    "has_belly_color::grey",
    "has_belly_color::yellow",
    "has_belly_color::olive",
    "has_belly_color::green",
    "has_belly_color::pink",
    "has_belly_color::orange",
    "has_belly_color::black",
    "has_belly_color::white",
    "has_belly_color::red",
    "has_belly_color::buff",
    "has_wing_shape::rounded-wings",
    "has_wing_shape::pointed-wings",
    "has_wing_shape::broad-wings",
    "has_wing_shape::tapered-wings",
    "has_wing_shape::long-wings",
    "has_size::large_(16_-_32_in)",
    "has_size::small_(5_-_9_in)",
    "has_size::very_large_(32_-_72_in)",
    "has_size::medium_(9_-_16_in)",
    "has_size::very_small_(3_-_5_in)",
    "has_shape::upright-perching_water-like",
    "has_shape::chicken-like-marsh",
    "has_shape::long-legged-like",
    "has_shape::duck-like",
    "has_shape::owl-like",
    "has_shape::gull-like",
    "has_shape::hummingbird-like",
    "has_shape::pigeon-like",
    "has_shape::tree-clinging-like",
    "has_shape::hawk-like",
    "has_shape::sandpiper-like",
    "has_shape::upland-ground-like",
    "has_shape::swallow-like",
    "has_shape::perching-like",
    "has_back_pattern::solid",
    "has_back_pattern::spotted",
    "has_back_pattern::striped",
    "has_back_pattern::multi-colored",
    "has_tail_pattern::solid",
    "has_tail_pattern::spotted",
    "has_tail_pattern::striped",
    "has_tail_pattern::multi-colored",
    "has_belly_pattern::solid",
    "has_belly_pattern::spotted",
    "has_belly_pattern::striped",
    "has_belly_pattern::multi-colored",
    "has_primary_color::blue",
    "has_primary_color::brown",
    "has_primary_color::iridescent",
    "has_primary_color::purple",
    "has_primary_color::rufous",
    "has_primary_color::grey",
    "has_primary_color::yellow",
    "has_primary_color::olive",
    "has_primary_color::green",
    "has_primary_color::pink",
    "has_primary_color::orange",
    "has_primary_color::black",
    "has_primary_color::white",
    "has_primary_color::red",
    "has_primary_color::buff",
    "has_leg_color::blue",
    "has_leg_color::brown",
    "has_leg_color::iridescent",
    "has_leg_color::purple",
    "has_leg_color::rufous",
    "has_leg_color::grey",
    "has_leg_color::yellow",
    "has_leg_color::olive",
    "has_leg_color::green",
    "has_leg_color::pink",
    "has_leg_color::orange",
    "has_leg_color::black",
    "has_leg_color::white",
    "has_leg_color::red",
    "has_leg_color::buff",
    "has_bill_color::blue",
    "has_bill_color::brown",
    "has_bill_color::iridescent",
    "has_bill_color::purple",
    "has_bill_color::rufous",
    "has_bill_color::grey",
    "has_bill_color::yellow",
    "has_bill_color::olive",
    "has_bill_color::green",
    "has_bill_color::pink",
    "has_bill_color::orange",
    "has_bill_color::black",
    "has_bill_color::white",
    "has_bill_color::red",
    "has_bill_color::buff",
    "has_crown_color::blue",
    "has_crown_color::brown",
    "has_crown_color::iridescent",
    "has_crown_color::purple",
    "has_crown_color::rufous",
    "has_crown_color::grey",
    "has_crown_color::yellow",
    "has_crown_color::olive",
    "has_crown_color::green",
    "has_crown_color::pink",
    "has_crown_color::orange",
    "has_crown_color::black",
    "has_crown_color::white",
    "has_crown_color::red",
    "has_crown_color::buff",
    "has_wing_pattern::solid",
    "has_wing_pattern::spotted",
    "has_wing_pattern::striped",
    "has_wing_pattern::multi-colored",
]


# %% [code]
selected_attribute_names = list(np.array(attributes)[selected_attributes])

# %% [markdown]
# Load the data

# %% [code]
reload(cub)

train_dl = load_data(
    pkl_paths=[os.path.join(cub.BASE_DIR, 'train.pkl')],
    use_attr=True,
    no_img=False,
    batch_size=128,
    uncertain_label=False,
    n_class_attr=2,
    image_dir='images',
    resampling=False,
    root_dir='CUB200/',
    num_workers=4,
)
imbalance = find_class_imbalance(os.path.join(cub.BASE_DIR, 'train.pkl'), True)
sample = next(iter(train_dl))

n_concepts, n_tasks = sample[2].shape[-1], 200
total_c = []
for (_, _, c) in train_dl:
    total_c.append(c.cpu().detach())
total_c = np.concatenate(total_c, axis=0)
concept_corr_matrix = np.corrcoef(total_c.T)

# %% [code]
reload(cub)

test_dl = load_data(
    pkl_paths=[os.path.join(cub.BASE_DIR, 'test.pkl')],
    use_attr=True,
    no_img=False,
    batch_size=128,
    uncertain_label=False,
    n_class_attr=2,
    image_dir='images',
    resampling=False,
    root_dir='CUB200/',
    num_workers=4,
)

# And split this up into arrays for ease of use
x_test, c_test, y_test = [], [], []
for (x, y, c) in test_dl:
    x_test.append(x)
    y_test.append(y)
    c_test.append(c)
x_test = np.concatenate(x_test, axis=0)
print("x_test.shape =", x_test.shape)
c_test = np.concatenate(c_test, axis=0)
print("c_test.shape =", c_test.shape)
y_test = np.concatenate(y_test, axis=0)
print("y_test.shape =", y_test.shape)

# %% [code]
reload(cub)

test_all_concept_ones_dl = load_data(
    pkl_paths=[os.path.join(cub.BASE_DIR, 'test.pkl')],
    use_attr=True,
    no_img=False,
    batch_size=128,
    uncertain_label=False,
    n_class_attr=2,
    image_dir='images',
    resampling=False,
    root_dir='CUB200/',
    num_workers=4,
    concept_transform=lambda c: np.ones(len(c)),
)

# And split this up into arrays for ease of use
x_test_all_ones, c_test_all_ones, y_test_all_ones = [], [], []
for (x, y, c) in test_all_concept_ones_dl:
    x_test_all_ones.append(x)
    y_test_all_ones.append(y)
    c_test_all_ones.append(c)
x_test_all_ones = np.concatenate(x_test_all_ones, axis=0)
print("x_test_all_ones.shape =", x_test_all_ones.shape)
c_test_all_ones = np.concatenate(c_test_all_ones, axis=0)
print("c_test_all_ones.shape =", c_test_all_ones.shape)
y_test_all_ones = np.concatenate(y_test_all_ones, axis=0)
print("y_test_all_ones.shape =", y_test_all_ones.shape)

# %% [code]
reload(cub)

test_all_concept_zeros_dl = load_data(
    pkl_paths=[os.path.join(cub.BASE_DIR, 'test.pkl')],
    use_attr=True,
    no_img=False,
    batch_size=128,
    uncertain_label=False,
    n_class_attr=2,
    image_dir='images',
    resampling=False,
    root_dir='CUB200/',
    num_workers=4,
    concept_transform=lambda c: np.zeros(len(c)),
)

# And split this up into arrays for ease of use
x_test_all_zeros, c_test_all_zeros, y_test_all_zeros = [], [], []
for (x, y, c) in test_all_concept_zeros_dl:
    x_test_all_zeros.append(x)
    y_test_all_zeros.append(y)
    c_test_all_zeros.append(c)
x_test_all_zeros = np.concatenate(x_test_all_zeros, axis=0)
print("x_test_all_zeros.shape =", x_test_all_zeros.shape)
c_test_all_zeros = np.concatenate(c_test_all_zeros, axis=0)
print("c_test_all_zeros.shape =", c_test_all_zeros.shape)
y_test_all_zeros = np.concatenate(y_test_all_zeros, axis=0)
print("y_test_all_zeros.shape =", y_test_all_zeros.shape)

# %% [code]
N_CONCEPTS, N_TASKS = 112, 200

# %% [markdown]
# Load CUB Models

# %% [code]
def load_cub_model(
    config,
    n_tasks=N_TASKS,
    result_dir=CUB_RESULTS_DIR,
    n_concepts=N_CONCEPTS,
    split=0,
    imbalance=None,
    intervention_idxs=None,
    adversarial_intervention=False,
    train_dl=None,
):
    if split is not None:
        full_run_name = f"{config['architecture']}{config.get('extra_name', '')}_{config['c_extractor_arch']}_fold_{split + 1}"
    else:
        full_run_name = f"{config['architecture']}{config.get('extra_name', '')}_{config['c_extractor_arch']}"
    selected_concepts = np.arange(n_concepts)
    if config.get("message_passing_layers"):
        edges = []
        edge_weights = []
        corr_thresh = config.get('corr_thresh')
        sorted_selected = sorted(selected_concepts)
        for i in range(n_concepts):
            i_idx = sorted_selected[i]
            for j in range(i + 1, n_concepts):
                j_idx = sorted_selected[j]
                if np.abs(concept_corr_matrix[i_idx, j_idx]) >= corr_thresh:
                    edges.append(np.array([[i, j], [j, i]]))
                    if config.get("weighted_edges"):
                        weight = np.abs(concept_corr_matrix[i_idx, j_idx])
                    else:
                        weight = 1
                    edge_weights.extend([weight, weight])
        concept_edge_list = torch.cuda.LongTensor(np.concatenate(edges, axis=-1))
        concept_edge_weights = torch.cuda.FloatTensor(np.array(edge_weights))
    else:
        concept_edge_list = None
        concept_edge_weights = None
    if (
        (intervention_idxs is not None) and
        (train_dl is not None) and
        (config['architecture'] == "ConceptBottleneckModel") and
        (not config.get('sigmoidal_prob', True))
    ):
        # Then let's look at the empirical distribution of the logits in order to
        # be able to intervene
        model = models.construct_model(
            n_concepts=n_concepts,
            n_tasks=n_tasks,
            config=config,
            imbalance=imbalance,
            concept_edge_list=concept_edge_list,
            concept_edge_weights=concept_edge_weights,
        )
        trainer = pl.Trainer(
            gpus=GPU,
        )
        batch_results = trainer.predict(model, train_dl)
        out_embs = np.concatenate(
            list(map(lambda x: x[1], batch_results)),
            axis=0,
        )
        active_intervention_values = []
        inactive_intervention_values = []
        for idx in range(n_concepts):
            active_intervention_values.append(np.percentile(out_embs[:, idx], 95))
            inactive_intervention_values.append(np.percentile(out_embs[:, idx], 5))
        print("For", full_run_name, "we found its intervention values to be:")
        print("\tactive_intervention_values =", active_intervention_values)
        print("\tinactive_intervention_values =", inactive_intervention_values)
    else:
        active_intervention_values = inactive_intervention_values = None
    model = models.construct_model(
        n_concepts=n_concepts,
        n_tasks=n_tasks,
        config=config,
        imbalance=imbalance,
        concept_edge_list=concept_edge_list,
        concept_edge_weights=concept_edge_weights,
        intervention_idxs=intervention_idxs,
        adversarial_intervention=adversarial_intervention,
        active_intervention_values=active_intervention_values,
        inactive_intervention_values=inactive_intervention_values,
    )
    model_saved_path = os.path.join(
        result_dir or ".",
        f'{full_run_name}.pt'
    )
    model.load_state_dict(torch.load(model_saved_path))
    return model

# %% [code]
reload(cub)
import models_cub
reload(models_cub)

WHITELIST = [
    'ConceptBottleneckModelFuzzyExtraCapacity_Logit',
    'MixtureEmbModelSharedProb_AdaptiveDropout_NoProbConcat',
]
all_models = defaultdict(dict)
intervention_models = defaultdict(dict)
for split, runs in normal_cub_configs.items():
    for model_name, config in runs.items(): 
        if model_name not in WHITELIST:
            continue
        try:
            config["shared_prob_gen"] = config.get("shared_prob_gen", False)
            config["per_concept_weight"] = config.get("per_concept_weight", False)
            all_models[split][model_name] = load_cub_model(
                config=config,
                n_tasks=N_TASKS,
                n_concepts=N_CONCEPTS,
                result_dir=CUB_RESULTS_DIR,
                split=int(split),
                imbalance=imbalance,
            )
            intervention_models[split][model_name] = load_cub_model(
                config=config,
                n_tasks=N_TASKS,
                n_concepts=N_CONCEPTS,
                result_dir=CUB_RESULTS_DIR,
                split=int(split),
                imbalance=imbalance,
                intervention_idxs=np.arange(N_CONCEPTS),
            )
        except Exception as e:
            print("Could not load model", model_name, "for split", split)
            print("\t", e)
            raise e

# %% [markdown]
# Extract Test Embeddings using all Models

# %% [code]
reload(models_cub)

test_c_embs = {}
test_c_embs_pos = {}
test_c_embs_neg = {}
test_c_embs_oracle = {}
test_c_embs_pure = {}
test_y_preds = {}
test_c_sems = {}


for model_name, model in all_models['0'].items():
    print(model_name)
    trainer = pl.Trainer(
        gpus=1,
    )
    batch_results = trainer.predict(model, test_dl)
    test_c_sems[model_name] = np.concatenate(
        list(map(lambda x: x[0], batch_results)),
        axis=0,
    )
    test_y_preds[model_name] = np.concatenate(
        list(map(lambda x: x[2], batch_results)),
        axis=0,
    )
    complete_c_embs = np.concatenate(
        list(map(lambda x: x[1], batch_results)),
        axis=0,
    )
    n_concepts = test_c_sems[model_name].shape[-1]
    if ("SplitEmbModel" in model_name) or ('MaskedSplitEmbModel' in model_name):
        
        c_embs = []
        c_embs_pure = []
        emb_size = complete_c_embs.shape[-1] // n_concepts
        for i in range(complete_c_embs.shape[-1] // emb_size):
            c_embs.append(
                np.expand_dims(
                    complete_c_embs[:, i*emb_size:(i+1)*emb_size],
                    axis=1,
                )
            )
            c_embs_pure.append(
                np.expand_dims(
                    # Do not include the last dimension as that is the probability/semantics dimension
                    complete_c_embs[:, i*emb_size:(i+1)*emb_size - 1],
                    axis=1,
                )
            )
    elif ("MixtureEmbModel" in model_name):
        
        c_embs = []
        c_embs_pure = []
        emb_size = complete_c_embs.shape[-1] // n_concepts
        for i in range(complete_c_embs.shape[-1] // emb_size):
            c_embs.append(
                np.expand_dims(
                    complete_c_embs[:, i*emb_size:(i+1)*emb_size],
                    axis=1,
                )
            )
            c_embs_pure.append(
                c_embs[-1],
            )
            
        # And compute also only positive
        pos_batch_results = trainer.predict(
            intervention_models['0'][model_name],
            test_all_concept_ones_dl,
        )
        pos_c_embs_complete = np.concatenate(
            list(map(lambda x: x[1], pos_batch_results)),
            axis=0,
        )
        # and negative embeddings
        neg_batch_results = trainer.predict(
            intervention_models['0'][model_name],
            test_all_concept_zeros_dl,
        )
        neg_c_embs_complete = np.concatenate(
            list(map(lambda x: x[1], neg_batch_results)),
            axis=0,
        )
        # also those embeddings that perfectly match their concepts
        oracle_batch_results = trainer.predict(
            intervention_models['0'][model_name],
            test_dl,
        )
        oracle_c_embs_complete = np.concatenate(
            list(map(lambda x: x[1], oracle_batch_results)),
            axis=0,
        )
        
        # put them together in the right form
        pos_c_embs = []
        neg_c_embs = []
        oracle_c_embs = []
        for i in range(complete_c_embs.shape[-1] // emb_size):
            pos_c_embs.append(
                np.expand_dims(
                    pos_c_embs_complete[:, i*emb_size:(i+1)*emb_size],
                    axis=1,
                )
            )
            neg_c_embs.append(
                np.expand_dims(
                    neg_c_embs_complete[:, i*emb_size:(i+1)*emb_size],
                    axis=1,
                )
            )
            oracle_c_embs.append(
                np.expand_dims(
                    oracle_c_embs_complete[:, i*emb_size:(i+1)*emb_size],
                    axis=1,
                )
            )
        test_c_embs_pos[model_name] = np.concatenate(pos_c_embs, axis=1)
        test_c_embs_neg[model_name] = np.concatenate(neg_c_embs, axis=1)
        test_c_embs_oracle[model_name] = np.concatenate(oracle_c_embs, axis=1)
        
    elif "ConceptBottleneckModel" in model_name:
        c_embs = []
        c_embs_pure = []
        for i in range(n_concepts):
            pure_entries = []
            entries = [complete_c_embs[:, i:i+1]]
            if complete_c_embs.shape[-1] > n_concepts:
                entries.append(complete_c_embs[:, n_concepts:])
                pure_entries.append(complete_c_embs[:, n_concepts:])
            c_embs.append(
                np.expand_dims(
                   np.concatenate(entries, axis=-1),
                   axis=1,
                )
            )
            if pure_entries:
                c_embs_pure.append(
                    np.expand_dims(
                       np.concatenate(pure_entries, axis=-1),
                       axis=1,
                    )
                )
    c_embs = np.concatenate(c_embs, axis=1)
    if len(c_embs_pure):
        c_embs_pure = np.concatenate(c_embs_pure, axis=1)

    test_c_embs[model_name] = c_embs
    test_c_embs_pure[model_name] = c_embs_pure


# %% [markdown]
# Functions for visualizing embedding clusters

# %% [code]
from sklearn.neighbors import NearestNeighbors
from scipy.cluster.hierarchy import dendrogram, linkage
from scipy.cluster.hierarchy import fcluster
from sklearn.manifold import TSNE

class UnNormalize(object):
    def __init__(self, mean, std):
        self.mean = mean
        self.std = std

    def __call__(self, tensor):
        """
        Args:
            tensor (Tensor): Tensor image of size (C, H, W) to be normalized.
        Returns:
            Tensor: Normalized image.
        """
        return tensor * np.expand_dims(np.expand_dims(self.std, axis=-1), axis=-1) + np.expand_dims(
            np.expand_dims(self.mean, axis=-1),
            axis=-1
        )
    
def show_bird_image(image, ax):
    ax.grid(False)
    ax.axis(False)
    ax.imshow(np.transpose(
        (UnNormalize(mean=[0.5, 0.5, 0.5], std=[2, 2, 2])(image) * 255).astype(np.int32),
        axes=[1, 2, 0]
    ))

def show_closest_activation_examples(
    x_test,
    test_dl,
    test_c_embs,
    concept_semantics=None,
    num_examples=5,
    shown_neighs=5,
    scale=1.5,
    selected_concepts=None,
    seed=None,
):
    np.random.seed(seed)
    selected_concepts = selected_concepts or list(range(test_c_embs.shape[1]))
    for selected_concept in selected_concepts:
        if concept_semantics is not None:
            print(
                "Selected concept at index",
                selected_concept,
                "with semantics",
                concept_semantics[selected_concept],
            )

        selected_inds = []
        for i, (_, _, c_batch) in enumerate(test_dl):
            for idx, c in enumerate(c_batch):
                if c[selected_concept] == 1:
                    selected_inds.append(i*c_batch.shape[0] + idx)
        selected_inds = np.random.choice(selected_inds, size=num_examples, replace=False,)
        fig, axs = plt.subplots(
            num_examples,
            shown_neighs + 2,
            figsize=(scale*shown_neighs, scale*num_examples),
        )
        if concept_semantics is not None:
            fig.suptitle(
                f'Closest Embeddings for Concept {concept_semantics[selected_concept]}',
                fontsize=15,
            )
        for i, example_idx in enumerate(selected_inds):
            show_bird_image(x_test[example_idx, :, :, :], axs[i, 0])
            if i == 0:
                # Then add a title here
                axs[i, 0].set_title("Sample", fontsize=20)
            # Let's add an empty image in between as a separator
            axs[i, 1].grid(False)
            axs[i, 1].axis(False)
            nbrs = NearestNeighbors(n_neighbors=(shown_neighs + 1), algorithm='ball_tree').fit(
                test_c_embs[:, selected_concept, :]
            )
            [distances], [nearest_indices] = nbrs.kneighbors(test_c_embs[example_idx:example_idx+1, selected_concept, :])
            for j, sample_idx in enumerate(nearest_indices[1:], start=2):
                show_bird_image(x_test[sample_idx, :, :, :], axs[i, j])
                if (i == 0) and ((j - 2) == shown_neighs // 2):
                    axs[i, j].set_title("Nearest Neighbors", fontsize=20)
        fig.tight_layout()
        fig.subplots_adjust(
            wspace=0,
            hspace=0,
        )
        plt.show()

def show_concept_clusters(
    x_test,
    test_c_embs,
    test_c_sems,
    max_d=50, #100
    concept_semantics=None,
    show_activated_only=True,
    show_examples=True,
    max_clusters=5,
    shown_samples=5,
    scale=1.5,
    selected_concepts=None,
    model_name="",
):
    selected_concepts = selected_concepts or list(range(test_c_embs.shape[1]))
    for selected_concept in selected_concepts:
        if concept_semantics is not None:
            print(
                "Selected concept at index",
                selected_concept,
                "with semantics",
                concept_semantics[selected_concept],
            )
        if show_activated_only:
            selected_inds = np.arange(0, test_c_embs.shape[0])[
                test_c_sems[:, selected_concept] > 0.5,
            ].astype(np.int32)
        else:
            selected_inds = np.arange(0, test_c_embs.shape[0]).astype(np.int32)

        selected_test_embs = test_c_embs[
            selected_inds,
            :,
            :
        ]

        if show_examples:
            print("Examples of selected test samples:")
            fig = plt.figure(figsize=(14, 6))
            for i, idx in enumerate(selected_inds[:8]):
                fig.add_subplot(1, 8, i + 1)
                show_bird_image(x_test[idx, :, :, :], plt)
            plt.show()

        # selected_test_embs = test_c_embs
        Z = linkage(selected_test_embs[:, selected_concept, :], 'ward')
        clusters = fcluster(Z, max_d, criterion='distance')
        cluster_types = np.unique(clusters)
        print("Found", len(cluster_types), "clusters from", clusters.shape[0], "samples")
        cluster_map = [
            [] for _ in range(len(cluster_types))
        ]
        for i, cluster_type in enumerate(clusters):
            cluster_map[cluster_type - 1].append(i)

        fig, axs = plt.subplots(
            min(len(cluster_map), max_clusters),
            shown_samples,
            figsize=(scale*shown_samples, scale*min(max_clusters, len(cluster_map))),
        )
        if concept_semantics is not None:
            fig.suptitle(
                f'{model_name} Sample Concept Clusters for Concept {concept_semantics[selected_concept]}',
                fontsize=15,
            )
        for row in axs:
            for ax in row:
                ax.grid(False)
                ax.axis(False)

        for cluster_id, samples in enumerate(cluster_map):
            if cluster_id >= max_clusters:
                break
            real_shown_samples = min(shown_samples, len(samples))
            centroid = np.expand_dims(
                np.mean(selected_test_embs[samples, selected_concept, :], axis=0),
                axis=0,
            )
            nbrs = NearestNeighbors(n_neighbors=real_shown_samples, algorithm='ball_tree').fit(
                selected_test_embs[samples, selected_concept, :]
            )
            [distances], [nearest_indices] = nbrs.kneighbors(centroid)
            for i, sample_idx in enumerate(nearest_indices):
                real_idx = selected_inds[samples[sample_idx]]
                show_bird_image(x_test[real_idx, :, :, :], axs[cluster_id, i])
        fig.tight_layout()
        fig.subplots_adjust(
            wspace=0,
            hspace=0.1,
        )
        plt.show()

def show_inter_concept_similarity(
    x_test,
    test_c_embs,
    test_c_sems,
    concept_semantics=None,
    show_activated_only=True,
    selected_concepts=None,
    normalize=True,
    n_closest=5,
    metric='cosine',
    to_console=True,
):
    selected_concepts = selected_concepts or list(range(test_c_embs.shape[1]))

    centroids = np.zeros((len(selected_concepts), test_c_embs.shape[-1]))
    for i, concept_idx in enumerate(selected_concepts):
        if show_activated_only:
            selected_inds = np.arange(0, test_c_embs.shape[0])[
                test_c_sems[:, concept_idx] > 0.5,
            ].astype(np.int32)
        else:
            selected_inds = np.arange(0, test_c_embs.shape[0]).astype(np.int32)

        selected_test_embs = test_c_embs[
            selected_inds,
            :,
            :
        ]
        centroids[i, :] = np.mean(
            selected_test_embs[:, concept_idx, :],
            axis=0,
        )
    if normalize:
        centroids = sklearn.preprocessing.normalize(centroids, axis=1)
    nbrs = NearestNeighbors(
        n_neighbors=n_closest + 1,
        algorithm='auto',
        metric=metric,
    ).fit(centroids)
    
    result = []
    for i, concept_idx in enumerate(selected_concepts):
        [distances], [nearest_concepts] = nbrs.kneighbors(centroids[i:i+1, :])
        concept_name = concept_idx
        nearest_concepts_idx = nearest_concepts
        if concept_semantics is not None:
            concept_name = concept_semantics[concept_idx]
            nearest_concepts = np.array(concept_semantics)[nearest_concepts]
        
        if to_console:
            print(f"Nearest concepts to concept {concept_name}:")
        partial_lst = []
        for j, name, dist in zip(nearest_concepts_idx, nearest_concepts[1:], distances[1:]):
            if to_console:
                print(f"\t{name} (distance {dist})")
            partial_lst.append((j, dist))
        result.append(partial_lst)
        if to_console:
            print()
    return centroids, result

def plot_concept_centroids(
    x_test,
    test_c_embs,
    test_c_sems,
    concept_semantics=None,
    selected_concepts=None,
    perplexity=50,
    n_iter=1000,
    figsize=(8, 6),
    show_activated_only=True,
    model_name="SplitEmb",
    annotation_size=5,
    concept_colors=None,
    dot_size=10,
    half_emb=False,
):
    selected_concepts = selected_concepts or list(range(test_c_embs.shape[1]))
    if half_emb:
        centroids = np.zeros((len(selected_concepts), test_c_embs.shape[-1]//2))
    else:
        centroids = np.zeros((len(selected_concepts), test_c_embs.shape[-1]))
    for i, concept_idx in enumerate(selected_concepts):
        if show_activated_only:
            selected_inds = np.arange(0, test_c_embs.shape[0])[
                test_c_sems[:, concept_idx] > 0.5,
            ].astype(np.int32)
        else:
            selected_inds = np.arange(0, test_c_embs.shape[0]).astype(np.int32)
        
        if half_emb:
            selected_test_embs = test_c_embs[
                selected_inds,
                :,
                :test_c_embs.shape[-1]//2
            ]
        else:
            selected_test_embs = test_c_embs[
                selected_inds,
                :,
                :
            ]
        centroids[i, :] = np.mean(
            selected_test_embs[:, concept_idx, :],
            axis=0,
        )
#     centroids = sklearn.preprocessing.normalize(centroids, axis=1)
    tsne = TSNE(
        n_components=2,
        verbose=1,
        perplexity=perplexity,
        n_iter=n_iter,
        init='pca',
        learning_rate='auto',
    )
    tsne_results = tsne.fit_transform(centroids)
    fig, ax = plt.subplots(
        1,
        1,
        figsize=figsize,
    )
    ax.set_title(
        f"{model_name} Cluster Centroids",
        fontsize=15,
    )
    if concept_colors is None:
        colors = []
        marker = []
        concept_semantics = concept_semantics or [
            f'concept_{idx}' for idx in selected_concepts
        ]
        for i, concept_idx in enumerate(selected_concepts):
            concept_name = concept_semantics[concept_idx]
            if "color" in concept_name:
                marker.append("o")
                color = concept_name[concept_name.find("::") + 2:]
                colors.append(color)
            else:
                colors.append("black")
                marker.append("x")
    else:
        colors = list(np.array(concept_colors)[selected_concepts])
        markers = ["o" for _ in selected_concepts]
    for i, color in enumerate(colors):
        if color == "buff":
            color = "palegoldenrod" 
        elif color == "multi-colored":
            color = "palegreen"
        elif color == "white":
            color = "cyan"
        colors[i] = color
    ax.scatter(
        tsne_results[:, 0],
        tsne_results[:, 1],
        c=colors,
        s=dot_size,
        # TODO!!!!!!!
#         marker=markers,
    )
   
    for i, concept_idx in enumerate(selected_concepts):
        concept_name = concept_semantics[concept_idx]
        ax.annotate(
            concept_semantics[concept_idx],
            (tsne_results[i, 0], tsne_results[i, 1]),
            fontsize=annotation_size,
        )
    ax.grid(False)
    ax.axis(False)
    fig.legend(fontsize=10) #, loc='center right')
    plt.show()
            
def plot_tsne_embeddings(
    test_c_embs,
    c_test,
    color_activations=None,
    color_activation_labels=None,
    attributes=None,
    perplexity=50,
    n_iter=1000,
    figsize=(8, 6),
    selected_concepts=None,
    y_test=None,
    model_name="SplitEmb",
):
    results = []
    selected_concepts = selected_concepts or list(range(test_c_embs.shape[1]))
    for selected_concept in selected_concepts:
        if attributes is not None:
            print(
                "Selected concept at index",
                selected_concept,
                "with semantics",
                attributes[selected_concept],
            )
        tsne = TSNE(
            n_components=2,
            verbose=1,
            perplexity=perplexity,
            n_iter=n_iter,
            init='pca',
            learning_rate='auto',
        )
        tsne_results = tsne.fit_transform(test_c_embs[:, selected_concept, :])
        results.append(tsne_results)
        if y_test is not None:
            fig, ax = plt.subplots(
                1,
                1,
                figsize=figsize,
            )
            if attributes is not None:
                ax.set_title(
                    f"TSNE Embeddings for {attributes[selected_concept]} (by class)",
                    fontsize=15,
                )
            ax.scatter(
                tsne_results[:, 0],
                tsne_results[:, 1],
                c=y_test,
                s=5,
                cmap='ocean',
            )
            ax.grid(False)
            ax.axis(False)
            plt.show()
            
        if color_activations is not None:
            activations = color_activations
        else:
            activations = [c_test[:, selected_concept]]
        for i, activation in enumerate(activations):
            if color_activation_labels is not None:
                activation_label = color_activation_labels[i]
            elif (color_activations is None):
                if (attributes is not None):
                    activation_label = attributes[selected_concept]
                else:
                    activation_label = f"Concept {selected_concept + 1}"
            else:
                activation_label = f"Concept {i + 1}"
            
            mask = activation == 1
            neg_mask = np.logical_not(mask)

            # And let's plot all of these
            fig, ax = plt.subplots(
                1,
                1,
                figsize=figsize,
            )
            if attributes is not None:
                ax.set_title(
                    f"{model_name} TSNE Embeddings for {attributes[selected_concept]}",
                    fontsize=15,
                )
            ax.scatter(
                tsne_results[mask, 0],
                tsne_results[mask, 1],
                color='red',
                label=activation_label + " active",
                s=5,
            )

            ax.scatter(
                tsne_results[neg_mask, 0],
                tsne_results[neg_mask, 1],
                color='blue',
                label=activation_label + " not active",
                s=5,
            )
            ax.grid(False)
            ax.axis(False)
            fig.legend(fontsize=10) #, loc='center right')
            plt.show()
        
    return results


def plot_tsne_latent_space(
    test_c_embs,
    c_test,
    attributes=None,
    perplexity=50,
    n_iter=1000,
    figsize=(8, 6),
    selected_concepts=None,
    y_test=None,
):
    tsne = TSNE(
        n_components=2,
        verbose=1,
        perplexity=perplexity,
        n_iter=n_iter,
        init='pca',
        learning_rate='auto',
    )
    latent_space = test_c_embs.reshape(
        test_c_embs.shape[0],
        -1,
    )
    tsne_results = tsne.fit_transform(latent_space)
    selected_concepts = selected_concepts or list(range(test_c_embs.shape[1]))
    if y_test is not None:
        fig, ax = plt.subplots(
            1,
            1,
            figsize=figsize,
        )
        if attributes is not None:
            ax.set_title(
                f"SplitEmb COMPLETE Latent Space TSNE colored by class",
                fontsize=15,
            )
        ax.scatter(
            tsne_results[:, 0],
            tsne_results[:, 1],
            c=y_test,
            s=5,
            cmap='ocean',
        )

        ax.grid(False)
        ax.axis(False)
        plt.show()
        
    for selected_concept in selected_concepts:
        if attributes is not None:
            print(
                "Selected concept at index",
                selected_concept,
                "with semantics",
                attributes[selected_concept],
            )

        mask = c_test[:, selected_concept] == 1
        neg_mask = np.logical_not(mask)

        # And let's plot all of these
        fig, ax = plt.subplots(
            1,
            1,
            figsize=figsize,
        )
        if attributes is not None:
            ax.set_title(
                f"SplitEmb COMPLETE Latent Space TSNE colored by {attributes[selected_concept]}",
                fontsize=15,
            )
        ax.scatter(
            tsne_results[mask, 0],
            tsne_results[mask, 1],
            color='red',
            label="Concept activated",
            s=5,
        )

        ax.scatter(
            tsne_results[neg_mask, 0],
            tsne_results[neg_mask, 1],
            color='blue',
            label="Concept not present",
            s=5,
        )
        ax.grid(False)
        ax.axis(False)
        fig.legend(fontsize=10) #, loc='center right')
        plt.show()
    return tsne_results

# %% [markdown]
# Time to look at clusters in SplitEmbedding model with shared probability generators

# %% [code]
color_idxs = []
colors = []
colored_rename = []
real_attributes = np.array(attributes)[selected_attributes]
for i, name in enumerate(real_attributes):
    if ("color" in name) and ("multi-colored" not in name):
        color_idxs.append(i)
        rename, color = name.split("::")
        if rename.startswith("has_"):
            rename = rename[len("has_"):]
        if rename.endswith("_color"):
            rename = rename[:-len("_color")]
        colors.append(color)
        colored_rename.append(color + "_" + rename)
    else:
        colors.append("black")
        colored_rename.append(name)

# %% [markdown]
## For mixture of embeddings model

# %% [code]
_ = plot_tsne_embeddings(
    c_test=c_test,
    y_test=y_test,
    test_c_embs=test_c_embs[f'MixtureEmbModelSharedProb_AdaptiveDropout_NoProbConcat'],
    attributes=real_attributes,
    perplexity=30,
    n_iter=1500,
    figsize=(8, 6),
    selected_concepts=list(range(0, len(selected_attributes), 2)),
    model_name="MixCEM",
)

# %% [code]
_ = plot_tsne_embeddings(
    c_test=c_test,
    y_test=y_test,
    test_c_embs=test_c_embs_oracle[f'MixtureEmbModelSharedProb_AdaptiveDropout_NoProbConcat'],
    attributes=real_attributes,
    perplexity=30,
    n_iter=1500,
    figsize=(8, 6),
    selected_concepts=list(range(0, len(selected_attributes), 2)),
    model_name="MixCEM",
)

# %% [code]
show_closest_activation_examples(
    x_test=x_test,
    test_c_embs=test_c_embs[f'MixtureEmbModelSharedProb_AdaptiveDropout_NoProbConcat'],
    concept_semantics=real_attributes,
    selected_concepts=list(range(0, len(selected_attributes), 2)),
    test_dl=test_dl,
    num_examples=5,
    shown_neighs=5,
)

# %% [markdown]
## Same experiments for Hybrid

# %% [code]
_ = plot_tsne_embeddings(
    c_test=c_test,
    y_test=y_test,
    test_c_embs=test_c_embs[f'ConceptBottleneckModelFuzzyExtraCapacity_Logit'],
    attributes=real_attributes,
    perplexity=30,
    n_iter=1500,
    figsize=(8, 6),
    selected_concepts=list(range(0, len(selected_attributes), 2)),
    model_name="Hybrid",
)

# %% [code]
_ = plot_tsne_embeddings(
    c_test=c_test,
    y_test=y_test,
    test_c_embs=test_c_embs_pure[f'ConceptBottleneckModelFuzzyExtraCapacity_Logit'],
    attributes=real_attributes,
    perplexity=30,
    n_iter=1500,
    figsize=(8, 6),
    selected_concepts=list(range(0, len(selected_attributes), 2)),
    model_name="Hybrid",
)
