# Supplementary material
Source: ML conference proceedings conference paper supplement (https://proceedings.neurips.cc/paper_files/paper/2022/hash/867c06823281e506e8059f5c13a57f75-Abstract.html)
Supplement: Supplementary file 1 [file 867c06823281e506e8059f5c13a57f75-Supplemental-Conference.zip › SupplementaryMaterial/code/core/cub_representation_use.ipynb]

# %% [markdown]
# Setup

# %% [code]
%load_ext autoreload
%load_ext tensorboard
%matplotlib inline

# %% [code]
import matplotlib
import numpy as np
import os
import random
import tensorflow as tf
import yaml
import matplotlib.pyplot as plt
import numpy as np
from matplotlib import rc
from matplotlib import cm
import seaborn as sns
from importlib import reload
from pathlib import Path
import sklearn
from tensorflow.keras.models import load_model
from joblib import dump, load
import pandas as pd
import cub_experiments as cub
import models
import torch
import pytorch_lightning as pl
from pytorch_lightning import seed_everything
import torchvision
from torchvision import transforms
from pytorch_lightning import seed_everything
import celeba_experiments as celeba
from CUB200.cub_loader import load_data, find_class_imbalance

# %% [code]
################################################################################
## Global Variables Defining Experiment Flow
################################################################################

GPU = 1
NUM_WORKERS = 5
LATEX_SYMBOL = "$"
RESULTS_DIR = "results/"
CUB_RESULTS_DIR = os.path.join(
    "results/cub_0.25_subsample",
)

rc('text', usetex=(LATEX_SYMBOL == "$"))
plt.style.use('seaborn-whitegrid')

# %% [markdown]
# Load Model Configs

# %% [code]
from collections import defaultdict
cub_configs = defaultdict(dict)

for file in os.listdir(CUB_RESULTS_DIR):
    if '_experiment_config.joblib' in file:
        config = load(os.path.join(CUB_RESULTS_DIR, file))
        fold = int(file[file.find("_fold_") + len("_fold_"):file.find("_experiment_config")]) - 1
        model_name = f"{config['architecture']}{config.get('extra_name', '')}"
        cub_configs[str(fold)][model_name] = config


print("CUB Model names:")
for model_name, _ in cub_configs['0'].items(): 
    print("\t", model_name)

# %% [markdown]
# Load the data

# %% [code]
seed_everything(42)
N_CONCEPTS, N_TASKS = 112, 200
og_config = cub_configs['0']['MixtureEmbModelSharedProb_AdaptiveDropout_NoProbConcat']
if og_config['weight_loss']:
    imbalance = find_class_imbalance(os.path.join(cub.BASE_DIR, 'train.pkl'), True)
else:
    imbalance = None
sampling_percent = og_config.get("sampling_percent", 1)
if sampling_percent != 1:
    # Do the subsampling
    new_n_concepts = int(np.ceil(N_CONCEPTS * sampling_percent))
    selected_concepts_file = os.path.join(
        CUB_RESULTS_DIR,
        f"selected_concepts_sampling_{sampling_percent}.npy",
    )
    selected_concepts = np.load(selected_concepts_file)
    print("\t\tSelected concepts:", selected_concepts)
    def subsample_transform(sample):
        if isinstance(sample, list):
            sample = np.array(sample)
        return sample[selected_concepts]

    if og_config['weight_loss']:
        imbalance = np.array(imbalance)[selected_concepts]

    train_dl = load_data(
        pkl_paths=[os.path.join(cub.BASE_DIR, 'train.pkl')],
        use_attr=True,
        no_img=False,
        batch_size=og_config['batch_size'],
        uncertain_label=False,
        n_class_attr=2,
        image_dir='images',
        resampling=False,
        root_dir=cub.CUB_DIR,
        num_workers=NUM_WORKERS,
        concept_transform=subsample_transform,
    )
    test_dl = load_data(
        pkl_paths=[os.path.join(cub.BASE_DIR, 'test.pkl')],
        use_attr=True,
        no_img=False,
        batch_size=og_config['batch_size'],
        uncertain_label=False,
        n_class_attr=2,
        image_dir='images',
        resampling=False,
        root_dir=cub.CUB_DIR,
        num_workers=NUM_WORKERS,
        concept_transform=subsample_transform,
    )
    
    train_complete_dl = load_data(
        pkl_paths=[os.path.join(cub.BASE_DIR, 'train.pkl')],
        use_attr=True,
        no_img=False,
        batch_size=og_config['batch_size'],
        uncertain_label=False,
        n_class_attr=2,
        image_dir='images',
        resampling=False,
        root_dir=cub.CUB_DIR,
        num_workers=NUM_WORKERS,
    )
    test_complete_dl = load_data(
        pkl_paths=[os.path.join(cub.BASE_DIR, 'test.pkl')],
        use_attr=True,
        no_img=False,
        batch_size=og_config['batch_size'],
        uncertain_label=False,
        n_class_attr=2,
        image_dir='images',
        resampling=False,
        root_dir=cub.CUB_DIR,
        num_workers=NUM_WORKERS,
    )

    # And set the right number of concepts to be used
    N_CONCEPTS = new_n_concepts
else:
    selected_concepts = list(range(N_CONCEPTS))
    train_dl = load_data(
        pkl_paths=[os.path.join(cub.BASE_DIR, 'train.pkl')],
        use_attr=True,
        no_img=False,
        batch_size=og_config['batch_size'],
        uncertain_label=False,
        n_class_attr=2,
        image_dir='images',
        resampling=False,
        root_dir=cub.CUB_DIR,
        num_workers=NUM_WORKERS,
    )
    test_dl = load_data(
        pkl_paths=[os.path.join(cub.BASE_DIR, 'test.pkl')],
        use_attr=True,
        no_img=False,
        batch_size=og_config['batch_size'],
        uncertain_label=False,
        n_class_attr=2,
        image_dir='images',
        resampling=False,
        root_dir=cub.CUB_DIR,
        num_workers=NUM_WORKERS,
    )

total_c = []
for (_, _, c) in train_dl:
    total_c.append(c.cpu().detach())
total_c = np.concatenate(total_c, axis=0)
concept_corr_matrix = np.corrcoef(total_c.T)

# %% [code]
# And split this up into arrays for ease of use
x_train, c_train, y_train = [], [], []
for (x, y, c) in train_dl:
    x_train.append(x)
    y_train.append(y)
    c_train.append(c)
x_train = np.concatenate(x_train, axis=0)
print("x_train.shape =", x_train.shape)
c_train = np.concatenate(c_train, axis=0)
print("c_train.shape =", c_train.shape)
y_train = np.concatenate(y_train, axis=0)
print("y_train.shape =", y_train.shape)

# And split this up into arrays for ease of use
x_train_complete, c_train_complete, y_train_complete = [], [], []
for (x, y, c) in train_complete_dl:
    x_train_complete.append(x)
    y_train_complete.append(y)
    c_train_complete.append(c)
x_train_complete = np.concatenate(x_train_complete, axis=0)
print("x_train_complete.shape =", x_train_complete.shape)
c_train_complete = np.concatenate(c_train_complete, axis=0)
print("c_train_complete.shape =", c_train_complete.shape)
y_train_complete = np.concatenate(y_train_complete, axis=0)
print("y_train_complete.shape =", y_train_complete.shape)

# %% [code]
# And split this up into arrays for ease of use
x_test, c_test, y_test = [], [], []
for (x, y, c) in test_dl:
    x_test.append(x)
    y_test.append(y)
    c_test.append(c)
x_test = np.concatenate(x_test, axis=0)
print("x_test.shape =", x_test.shape)
c_test = np.concatenate(c_test, axis=0)
print("c_test.shape =", c_test.shape)
y_test = np.concatenate(y_test, axis=0)
print("y_test.shape =", y_test.shape)

# And split this up into arrays for ease of use
x_test_complete, c_test_complete, y_test_complete = [], [], []
for (x, y, c) in test_complete_dl:
    x_test_complete.append(x)
    y_test_complete.append(y)
    c_test_complete.append(c)
x_test_complete = np.concatenate(x_test_complete, axis=0)
print("x_test_complete.shape =", x_test_complete.shape)
c_test_complete = np.concatenate(c_test_complete, axis=0)
print("c_test_complete.shape =", c_test_complete.shape)
y_test_complete = np.concatenate(y_test_complete, axis=0)
print("y_test_complete.shape =", y_test_complete.shape)

# %% [markdown]
# Load Models

# %% [code]
def load_trained_model(
    config,
    n_tasks=N_TASKS,
    result_dir=CUB_RESULTS_DIR,
    n_concepts=N_CONCEPTS,
    split=0,
    imbalance=None,
    intervention_idxs=None,
    adversarial_intervention=False,
    train_dl=None,
):
    if split is not None:
        full_run_name = f"{config['architecture']}{config.get('extra_name', '')}_{config['c_extractor_arch']}_fold_{split + 1}"
    else:
        full_run_name = f"{config['architecture']}{config.get('extra_name', '')}_{config['c_extractor_arch']}"
    selected_concepts = np.arange(n_concepts)
    if config.get("message_passing_layers"):
        edges = []
        edge_weights = []
        corr_thresh = config.get('corr_thresh')
        sorted_selected = sorted(selected_concepts)
        for i in range(n_concepts):
            i_idx = sorted_selected[i]
            for j in range(i + 1, n_concepts):
                j_idx = sorted_selected[j]
                if np.abs(concept_corr_matrix[i_idx, j_idx]) >= corr_thresh:
                    edges.append(np.array([[i, j], [j, i]]))
                    if config.get("weighted_edges"):
                        weight = np.abs(concept_corr_matrix[i_idx, j_idx])
                    else:
                        weight = 1
                    edge_weights.extend([weight, weight])
        concept_edge_list = torch.cuda.LongTensor(np.concatenate(edges, axis=-1))
        concept_edge_weights = torch.cuda.FloatTensor(np.array(edge_weights))
    else:
        concept_edge_list = None
        concept_edge_weights = None
    if (
        (intervention_idxs is not None) and
        (train_dl is not None) and
        (config['architecture'] == "ConceptBottleneckModel") and
        (not config.get('sigmoidal_prob', True))
    ):
        # Then let's look at the empirical distribution of the logits in order to
        # be able to intervene
        model = models.construct_model(
            n_concepts=n_concepts,
            n_tasks=n_tasks,
            config=config,
            imbalance=imbalance,
            concept_edge_list=concept_edge_list,
            concept_edge_weights=concept_edge_weights,
        )
        trainer = pl.Trainer(
            gpus=GPU,
        )
        batch_results = trainer.predict(model, train_dl)
        out_embs = np.concatenate(
            list(map(lambda x: x[1], batch_results)),
            axis=0,
        )
        active_intervention_values = []
        inactive_intervention_values = []
        for idx in range(n_concepts):
            active_intervention_values.append(np.percentile(out_embs[:, idx], 95))
            inactive_intervention_values.append(np.percentile(out_embs[:, idx], 5))
        print("For", full_run_name, "we found its intervention values to be:")
        print("\tactive_intervention_values =", active_intervention_values)
        print("\tinactive_intervention_values =", inactive_intervention_values)
    else:
        active_intervention_values = inactive_intervention_values = None
    model = models.construct_model(
        n_concepts=n_concepts,
        n_tasks=n_tasks,
        config=config,
        imbalance=imbalance,
        concept_edge_list=concept_edge_list,
        concept_edge_weights=concept_edge_weights,
        intervention_idxs=intervention_idxs,
        adversarial_intervention=adversarial_intervention,
        active_intervention_values=active_intervention_values,
        inactive_intervention_values=inactive_intervention_values,
    )
    model_saved_path = os.path.join(
        result_dir or ".",
        f'{full_run_name}.pt'
    )
    model.load_state_dict(torch.load(model_saved_path))
    return model

# %% [code]
reload(cub)
import models_cub
reload(models_cub)

WHITELIST = [
    'ConceptBottleneckModelFuzzyExtraCapacity_Logit',
    'MixtureEmbModelSharedProb_AdaptiveDropout_NoProbConcat',
]
all_models = defaultdict(dict)
for split, runs in cub_configs.items():
    for model_name, config in runs.items(): 
        if model_name not in WHITELIST:
            continue
        try:
            config["shared_prob_gen"] = config.get("shared_prob_gen", False)
            config["per_concept_weight"] = config.get("per_concept_weight", False)
            all_models[split][model_name] = load_trained_model(
                config=config,
                n_tasks=N_TASKS,
                n_concepts=N_CONCEPTS,
                result_dir=CUB_RESULTS_DIR,
                split=int(split),
                imbalance=imbalance,
            )
        except Exception as e:
            print("Could not load model", model_name, "for split", split)
            print("\t", e)
            raise e

# %% [markdown]
# Now time to train a simple classifier to predict the hidden concepts

# %% [code]
def compute_bin_accuracy(y_pred, y_true):
    y_probs = y_pred.cpu().detach()
    y_pred = y_probs > 0.5
    y_true = y_true.reshape(-1).cpu().detach()
    y_accuracy = sklearn.metrics.accuracy_score(y_true, y_pred)
    try:
        y_auc = sklearn.metrics.roc_auc_score(y_true, y_probs)
    except:
        y_auc = 0
    try:
        y_f1 = sklearn.metrics.f1_score(y_true, y_pred)
    except:
        y_f1 = 0
    return (y_accuracy, y_auc, y_f1)

def compute_accuracy(
    y_pred,
    y_true,
):
    if (len(y_pred.shape) < 2) or (y_pred.shape[-1] == 1):
        return compute_bin_accuracy(
            y_pred,
            y_true,
        )
    y_probs = torch.nn.Softmax(dim=-1)(y_pred).cpu().detach()
    used_classes = np.unique(y_true.reshape(-1).cpu().detach())
    y_probs = y_probs[:, sorted(list(used_classes))]
    y_pred = y_pred.argmax(dim=-1).cpu().detach()
    y_true = y_true.reshape(-1).cpu().detach()
    y_accuracy = sklearn.metrics.accuracy_score(y_true, y_pred)
    try:
        y_auc = sklearn.metrics.roc_auc_score(y_true, y_probs, multi_class='ovo')
    except:
        y_auc = 0.0
    y_f1 = 0.0
    return (y_accuracy, y_auc, y_f1)


class SimpleMLP(pl.LightningModule):
    def __init__(
        self,
        n_features,
        n_tasks,
        layer_sizes=[],
        momentum=0.9,
        learning_rate=0.01,
        weight_decay=4e-05,
        optimizer="sgd",
    ):
        super().__init__()
        self.n_tasks = n_tasks
        layers = []
        prev_size = n_features
        for size in (layer_sizes or []):
            layers.append(torch.nn.Linear(prev_size, size))
            layers.append(torch.nn.LeakyReLU())
            prev_size = size
        layers.append(torch.nn.Linear(prev_size, n_tasks))
        self.model = torch.nn.Sequential(*layers)
        self.loss_task = torch.nn.CrossEntropyLoss() if n_tasks > 1 else torch.nn.BCEWithLogitsLoss()
        self.momentum = momentum
        self.learning_rate = learning_rate
        self.optimizer_name = optimizer
        self.weight_decay = weight_decay

    def _unpack_batch(self, batch):
        x, y = batch
        return x, y
    
    def forward(self, x):
        return self.model(x)
    
    def predict_step(self, batch, batch_idx, dataloader_idx=0):
        x, y = self._unpack_batch(batch)
        return self(x)

    def _run_step(self, batch, batch_idx, train=False):
        x, y = self._unpack_batch(batch)
        y_logits = self(x)
        loss = self.loss_task(
            y_logits if y_logits.shape[-1] > 1 else y_logits.reshape(-1),
            y,
        )
        # compute accuracy
        (y_accuracy, y_auc, y_f1) = compute_accuracy(
            y_logits,
            y,
        )
        result = {
            "y_accuracy": y_accuracy,
            "y_auc": y_auc,
            "y_f1": y_f1,
            "loss": loss.detach(),
        }
        return loss, result

    def training_step(self, batch, batch_no):
        loss, result = self._run_step(batch, batch_no, train=True)
        for name, val in result.items():
            self.log(name, val, prog_bar=("accuracy" in name))
        return {
            "loss": loss,
            "log": {
                "y_accuracy": result['y_accuracy'],
                "y_auc": result['y_auc'],
                "y_f1": result['y_f1'],
                "loss": result['loss'],
            },
        }

    def validation_step(self, batch, batch_no):
        loss, result = self._run_step(batch, batch_no, train=False)
        for name, val in result.items():
            self.log("val_" + name, val, prog_bar=("accuracy" in name))
        return {
            "val_" + key: val
            for key, val in result.items()
        }

    def test_step(self, batch, batch_no):
        loss, result = self._run_step(batch, batch_no, train=False)
        for name, val in result.items():
            self.log("test_" + name, val, prog_bar=True)
        return result['loss']

    def configure_optimizers(self):
        if self.optimizer_name.lower() == "adam":
            optimizer = torch.optim.Adam(
                self.parameters(),
                lr=self.learning_rate,
                weight_decay=self.weight_decay,
            )
        else:
            optimizer = torch.optim.SGD(
                filter(lambda p: p.requires_grad, self.parameters()),
                lr=self.learning_rate,
                momentum=self.momentum,
                weight_decay=self.weight_decay,
            )
        lr_scheduler = torch.optim.lr_scheduler.ReduceLROnPlateau(optimizer)
        return {
            "optimizer": optimizer,
            "lr_scheduler": lr_scheduler,
            "monitor": "loss",
        }

# %% [code]
def train_mlp(train_dl, test_dl, n_tasks=1, layer_sizes=[], max_epochs=100, gpu=1, verbose=True):
    (x, y) = next(iter(train_dl))
    n_features = x.shape[-1]
    print("n_features =", n_features)
    model = SimpleMLP(
        n_features=n_features,
        n_tasks=n_tasks,
        layer_sizes=layer_sizes,
    )
    trainer = pl.Trainer(
        gpus=gpu,
        max_epochs=max_epochs,
        check_val_every_n_epoch=5
    )
    # Else it is time to train it
    trainer.fit(model, train_dl)
    # freeze model and compute test accuracy
    model.freeze()
    [test_results] = trainer.test(model, test_dl)
    y_accuracy = test_results["test_y_accuracy"]
    return model, test_results

# %% [code]
def check_bottleneck(
    x_test_complete,
    y_test_complete,
    c_test_complete,
    model_name,
    selected_concepts=selected_concepts,
    max_epochs=50,
    layer_sizes=[],
):
    folds = sorted(list(map(int, all_models.keys())))
    trainer = pl.Trainer(
        gpus=1,
    )
    model_test_results = []
    model_mean_other_concept_accs = []
    maj_mean_other_concept_accs = []
    for fold in folds:
        print("Starting with fold", fold + 1)
        if str(fold) not in all_models or (
            model_name not in all_models[str(fold)]
        ):
            print("Skipping", model_name, "for fold", fold + 1, "as we could not find it")
            continue
        model = all_models[str(fold)][model_name]
        test_batch_results = trainer.predict(
            model,
            torch.utils.data.DataLoader(
                torch.utils.data.TensorDataset(
                    torch.cuda.FloatTensor(x_test_complete),
                    torch.cuda.FloatTensor(y_test_complete),
                    torch.cuda.FloatTensor(c_test_complete),
                ),
                batch_size=1,
            ),
        )
        train_batch_results = trainer.predict(
            model,
            torch.utils.data.DataLoader(
                torch.utils.data.TensorDataset(
                    torch.cuda.FloatTensor(x_train_complete),
                    torch.cuda.FloatTensor(y_train_complete),
                    torch.cuda.FloatTensor(c_train_complete),
                ),
                batch_size=1,
            ),
        )
        test_complete_embs = np.concatenate(
            list(map(lambda x: x[1], test_batch_results)),
            axis=0,
        )

        train_complete_embs = np.concatenate(
            list(map(lambda x: x[1], train_batch_results)),
            axis=0,
        )

        mean_acc = 0
        maj_class_acc = 0 
        for concept_idx in range(c_train_complete.shape[-1]):
            if concept_idx in selected_concepts:
                print("Skipping concept", concept_idx, "as it was used during training")
                continue
            print("Training with concept index", concept_idx, "for fold", fold)
            current_train_ds = torch.utils.data.TensorDataset(
                torch.cuda.FloatTensor(
                    train_complete_embs
                ),
                torch.cuda.FloatTensor(c_train_complete[:, concept_idx]),
            )
            current_train_dl = torch.utils.data.DataLoader(
                current_train_ds,
                batch_size=512,
            )

            current_test_ds = torch.utils.data.TensorDataset(
                torch.cuda.FloatTensor(
                    test_complete_embs
                ),
                torch.cuda.FloatTensor(c_test_complete[:, concept_idx]),
            )
            current_test_dl = torch.utils.data.DataLoader(
                current_test_ds,
                batch_size=512,
            )


            _, test_results = train_mlp(
                train_dl=current_train_dl,
                test_dl=current_test_dl,
                layer_sizes=layer_sizes,
                max_epochs=max_epochs,
                verbose=False,
            )
            print("For concept", concept_idx, "we obtained accuracy", test_results['test_y_accuracy'])
            mean_acc += test_results['test_y_accuracy']/(c_train_complete.shape[-1] - len(selected_concepts))
            maj_class_acc += max(
                1 - np.mean(c_test_complete[:, concept_idx]),
                np.mean(c_test_complete[:, concept_idx]),
            )/(c_train_complete.shape[-1] - len(selected_concepts))
        model_mean_other_concept_accs.append(mean_acc)
        maj_mean_other_concept_accs.append(maj_class_acc)
        print("Resulting mean accuracy is:", mean_acc)
        print("Majority class accuracy is:", maj_class_acc)
    return model_mean_other_concept_accs, maj_mean_other_concept_accs

# %% [code]
# Now the same but with a single linear layer
import logging
logging.getLogger("lightning").setLevel(logging.ERROR)
import logging
logging.getLogger("lightning").addHandler(logging.NullHandler())
logging.getLogger("lightning").propagate = False
import warnings
warnings.filterwarnings('ignore')

single_mixed_mean_accs, maj_mean_accs = check_bottleneck(
    x_test_complete=x_test_complete,
    y_test_complete=y_test_complete,
    c_test_complete=c_test_complete,
    model_name='MixtureEmbModelSharedProb_AdaptiveDropout_NoProbConcat',
    selected_concepts=selected_concepts,
    max_epochs=50,
    layer_sizes=[],
)

# %% [code]
!mkdir results/cub_representation_use

# %% [code]
import joblib

joblib.dump(
    single_mixed_mean_accs,
    os.path.join("results/cub_representation_use", f'single_mixed_mean_accs.joblib'),
)

# %% [code]
print("Result:", 100*np.mean(single_mixed_mean_accs), "±", 200*np.std(single_mixed_mean_accs))

# %% [markdown]
## Time to do the same with the Hybrid representation

# %% [code]
import logging
logging.getLogger("lightning").setLevel(logging.ERROR)
import logging
logging.getLogger("lightning").addHandler(logging.NullHandler())
logging.getLogger("lightning").propagate = False
import warnings

single_hybrid_mean_accs, maj_mean_accs = check_bottleneck(
    x_test_complete=x_test_complete,
    y_test_complete=y_test_complete,
    c_test_complete=c_test_complete,
    model_name='ConceptBottleneckModelFuzzyExtraCapacity_Logit',
    selected_concepts=selected_concepts,
    max_epochs=50,
    layer_sizes=[],
)

# %% [code]
import joblib

joblib.dump(
    single_hybrid_mean_accs,
    os.path.join("results/cub_representation_use", f'single_hybrid_mean_accs.joblib'),
)

# %% [code]
print("Result:", 100*np.mean(single_hybrid_mean_accs), "±", 200*np.std(single_hybrid_mean_accs))
