# Supplementary material
Source: ML conference proceedings conference paper supplement (https://proceedings.neurips.cc/paper_files/paper/2022/hash/867c06823281e506e8059f5c13a57f75-Abstract.html)
Supplement: Supplementary file 1 [file 867c06823281e506e8059f5c13a57f75-Supplemental-Conference.zip › SupplementaryMaterial/code/core/homogeneity.py]

import numpy as np
from sklearn.metrics import homogeneity_score
from sklearn_extra.cluster import KMedoids


def embedding_homogeneity(
    c_vec: np.array,
    c_test: np.array,
    y_test: np.array,
    step: int,
) -> [float, float]:
    """
    Computes the alignment between learnt concepts and labels.

    :param c_vec: predicted concept representations (can be concept embeddings)
    :param c_test: concept ground truth labels
    :param y_test: task ground truth labels
    :param step: integration step
    :return: concept alignment AUC, task alignment AUC
    """
    # compute the maximum value for the AUC
    n_clusters = np.linspace(2, c_vec.shape[0], step).astype(int)
    max_auc = np.trapz(np.ones(step))

    # for each concept:
    #   1. find clusters
    #   2. compare cluster assignments with ground truth concept/task labels
    concept_auc, task_auc = [], []
    for concept_id in range(c_test.shape[1]):
        concept_homogeneity, task_homogeneity = [], []
        for nc in n_clusters:
            kmedoids = KMedoids(n_clusters=nc, random_state=0)
            if c_vec.shape[1] != c_test.shape[1]:
                c_cluster_labels = kmedoids.fit_predict(
                    np.hstack([
                        c_vec[:, concept_id][:, np.newaxis],
                        c_vec[:, c_test.shape[1]:]
                    ])
                )
            elif c_vec.shape[1] == c_test.shape[1] and len(c_vec.shape) == 2:
                c_cluster_labels = kmedoids.fit_predict(
                    c_vec[:, concept_id].reshape(-1, 1)
                )
            else:
                c_cluster_labels = kmedoids.fit_predict(c_vec[:, concept_id])

            # compute alignment with ground truth labels
            concept_homogeneity.append(
                homogeneity_score(c_test[:, concept_id], c_cluster_labels)
            )
            task_homogeneity.append(
                homogeneity_score(y_test, c_cluster_labels)
            )

        # compute the area under the curve
        concept_auc.append(np.trapz(np.array(concept_homogeneity)) / max_auc)
        task_auc.append(np.trapz(np.array(task_homogeneity)) / max_auc)

    # return the average alignment across all concepts
    concept_auc = np.mean(concept_auc)
    task_auc = np.mean(task_auc)
    return concept_auc, task_auc
