# Supplementary material
Source: ML conference proceedings conference paper supplement (https://proceedings.neurips.cc/paper_files/paper/2022/hash/867c06823281e506e8059f5c13a57f75-Abstract.html)
Supplement: Supplementary file 1 [file 867c06823281e506e8059f5c13a57f75-Supplemental-Conference.zip › SupplementaryMaterial/code/core/models.py]

import os
import numpy as np
import sklearn
import torch
import pytorch_lightning as pl

from torchvision.models import resnet50, densenet121

################################################################################
## HELPER LAYERS
################################################################################


class LambdaLayer(torch.nn.Module):
    def __init__(self, lambd):
        super(LambdaLayer, self).__init__()
        self.lambd = lambd
    def forward(self, x):
        return self.lambd(x)


################################################################################
## BASELINE MODEL
################################################################################


class ConceptBottleneckModel(pl.LightningModule):
    def __init__(
        self,
        n_concepts,
        n_tasks,
        bool,
        x2c_model=None,
        c2y_model=None,
        concept_loss_weight=0.01,
        task_loss_weight=1,
        momentum=0.9,
        learning_rate=0.01,
        weight_decay=4e-05,
        weight_loss=None,
        normalize_loss=False,
        pretrain_model=True,
        c_extractor_arch=resnet50,
        optimizer="adam",
        extra_dims=0,
        top_k_accuracy=None,
        intervention_idxs=None,
        sigmoidal_prob=True,
        sigmoidal_extra_capacity=True,
        bottleneck_nonlinear=None,
        adversarial_intervention=False,
        c2y_layers=None,
        active_intervention_values=None,
        inactive_intervention_values=None,
    ):
        super().__init__()
        self.n_concepts = n_concepts
        if x2c_model is not None:
            # Then this is assumed to be a module already provided as
            # the input to concepts method
            self.x2c_model = x2c_model
        else:
            # Else we assume that it is a callable function which we will
            # need to instantiate here
            try:
                model = c_extractor_arch(pretrained=pretrain_model)
                if c_extractor_arch == densenet121:
                    model.classifier = torch.nn.Linear(
                        1024,
                        n_concepts + extra_dims,
                    )
                elif hasattr(model, 'fc'):
                    model.fc = torch.nn.Linear(512, n_concepts + extra_dims)
            except Exception as e:
                model = c_extractor_arch(output_dim=(n_concepts + extra_dims))
            self.x2c_model = model

        # Now construct the label prediction model
        if c2y_model is not None:
            # Then this method has been provided to us already
            self.c2y_model = c2y_model
        else:
            # Else we construct it here directly
            units = [n_concepts + extra_dims] + (c2y_layers or []) + [n_tasks]
            layers = [
                torch.nn.Linear(units[i-1], units[i])
                for i in range(1, len(units))
            ]
            self.c2y_model = torch.nn.Sequential(*layers)

        # Intervention-specific fields/handlers:
        if active_intervention_values is not None:
            self.active_intervention_values = torch.cuda.FloatTensor(
                active_intervention_values
            )
        else:
            # Setting to 5 for prob = 1 (as that would result in its sigmoid
            # value being very close to 1) and -5 if prob=0 (as that will
            # go to zero when applied a sigmoid)
            self.active_intervention_values = torch.cuda.FloatTensor(
                [1 for _ in range(n_concepts)]
            ) * (
                5.0 if not sigmoidal_prob else 1.0
            )
        if inactive_intervention_values is not None:
            self.inactive_intervention_values = torch.cuda.FloatTensor(
                inactive_intervention_values
            )
        else:
            # Setting to 5 for prob = 1 (as that would result in its sigmoid
            # value being very close to 1) and -5 if prob=0 (as that will
            # go to zero when applied a sigmoid)
            self.inactive_intervention_values = torch.cuda.FloatTensor(
                [1 for _ in range(n_concepts)]
            ) * (
                -5.0 if not sigmoidal_prob else 0.0
            )
        # For legacy purposes, we wrap the model around a torch.nn.Sequential module
        self.sig = torch.nn.Sigmoid()
        if sigmoidal_extra_capacity:
            # Keeping this for backwards compatability
            bottleneck_nonlinear = "sigmoid"
        if bottleneck_nonlinear == "sigmoid":
            self.bottleneck_nonlin = torch.nn.Sigmoid()
        elif bottleneck_nonlinear == "leakyrelu":
            self.bottleneck_nonlin = torch.nn.LeakyReLU()
        elif bottleneck_nonlinear == "relu":
            self.bottleneck_nonlin = torch.nn.ReLU()
        elif (bottleneck_nonlinear is None) or (
            bottleneck_nonlinear == "identity"
        ):
            self.bottleneck_nonlin = lambda x: x
        else:
            raise ValueError(
                f"Unsupported nonlinearity '{bottleneck_nonlinear}'"
            )

        self.loss_concept = torch.nn.BCELoss(weight=weight_loss)
        self.loss_task = (
            torch.nn.CrossEntropyLoss()
            if n_tasks > 1 else torch.nn.BCEWithLogitsLoss()
        )
        self.bool = bool
        self.concept_loss_weight = concept_loss_weight
        self.task_loss_weight = task_loss_weight
        self.momentum = momentum
        self.learning_rate = learning_rate
        self.weight_decay = weight_decay
        self.normalize_loss = normalize_loss
        self.optimizer_name = optimizer
        self.extra_dims = extra_dims
        self.top_k_accuracy = top_k_accuracy
        self.n_tasks = n_tasks
        self.intervention_idxs = intervention_idxs
        self.adversarial_intervention = adversarial_intervention
        self.sigmoidal_prob = sigmoidal_prob
        self.sigmoidal_extra_capacity = sigmoidal_extra_capacity

    def _unpack_batch(self, batch):
        x = batch[0]
        if isinstance(batch[1], list):
            y, c = batch[1]
        else:
            y, c = batch[1], batch[2]
        return x, y, c

    def _switch_concepts(self, c):
        if self.adversarial_intervention:
            return (c == 0.0).type_as(c)
        return c

    def _concept_intervention(
        self,
        c_pred,
        intervention_idxs=None,
        c_true=None,
    ):
        if (c_true is None) or (intervention_idxs is None):
            return c_pred
        c_true = self._switch_concepts(c_true)
        c_pred_copy = c_pred.clone()
        if self.sigmoidal_prob:
            c_pred_copy[:, intervention_idxs] = c_true[:, intervention_idxs]
        else:

            c_pred_copy[:, intervention_idxs] = (
                (
                    c_true[:, intervention_idxs] *
                    self.active_intervention_values[intervention_idxs]
                ) +
                (
                    (c_true[:, intervention_idxs] - 1) *
                    -self.inactive_intervention_values[intervention_idxs]
                )
            )

        return c_pred_copy

    def _forward(self, x, intervention_idxs=None, c=None, train=False):
        c_pred = self.x2c_model(x)
        if self.sigmoidal_prob or self.bool:
            if self.extra_dims:
                # Then we only sigmoid on the probability bits but
                # let the other entries up for grabs
                c_pred_probs = self.sig(c_pred[:, :-self.extra_dims])
                c_others = self.bottleneck_nonlin(c_pred[:,-self.extra_dims:])
                c_pred =  torch.cat([c_pred_probs, c_others], axis=-1)
            else:
                c_pred = self.sig(c_pred)
            # And the semantics vector is just the predictions
            if self.extra_dims:
                c_sem = c_pred[:, :-self.extra_dims]
            else:
                c_sem = c_pred
        else:
            # Otherwise, the concept vector itself is not sigmoided
            # but the semantics
            if self.extra_dims:
                c_sem = self.sig(c_pred[:, :-self.extra_dims])
            else:
                c_sem = self.sig(c_pred)
        # Now include any interventions that we may want to include
        c_pred = self._concept_intervention(
            c_pred=c_pred,
            intervention_idxs=intervention_idxs,
            c_true=c,
        )
        if self.bool:
            y = self.c2y_model((c_pred > 0.5).float())
        else:
            y = self.c2y_model(c_pred)
        return c_sem, c_pred, y

    def forward(self, x):
        return self._forward(x, train=False)

    def intervention_prediction_step(self, batch, batch_idx, dataloader_idx=0):
        x, y, c = self._unpack_batch(batch)
        return self._forward(
            x,
            intervention_idxs=self.intervention_idxs,
            c=c,
            train=False,
        )

    def predict_step(self, batch, batch_idx, dataloader_idx=0):
        if self.intervention_idxs is not None:
            # Then we are initiating a concept intervention here
            return self.intervention_prediction_step(
                batch=batch,
                batch_idx=batch_idx,
                dataloader_idx=dataloader_idx,
            )
        x, y, c = self._unpack_batch(batch)
        return self(x)

    def _run_step(self, batch, batch_idx, train=False):
        x, y, c = self._unpack_batch(batch)
        if self.intervention_idxs is not None:
            c_sem, c_logits, y_logits = self._forward(
                x,
                intervention_idxs=self.intervention_idxs,
                c=c,
                train=train,
            )
        else:
            c_sem, c_logits, y_logits = self._forward(x, c=c, train=train)
        if self.task_loss_weight != 0:
            task_loss = self.loss_task(
                y_logits if y_logits.shape[-1] > 1 else y_logits.reshape(-1),
                y,
            )
            task_loss_scalar = task_loss.detach()
        else:
            task_loss = 0
            task_loss_scalar = 0
        if self.concept_loss_weight != 0:
            # We separate this so that we are allowed to
            # use arbitrary activations (i.e., not necessarily in [0, 1])
            # whenever no concept supervision is provided
            concept_loss = self.loss_concept(c_sem, c)
            loss = self.concept_loss_weight * concept_loss + task_loss
            concept_loss_scalar = concept_loss.detach()
        else:
            loss = task_loss
            concept_loss_scalar = 0.0
        if self.normalize_loss:
            loss = loss / (1 + self.concept_loss_weight * c.shape[-1])
        # compute accuracy
        (c_accuracy, c_auc, c_f1), (y_accuracy, y_auc, y_f1) = compute_accuracy(
            c_sem,
            y_logits,
            c,
            y,
        )
        result = {
            "c_accuracy": c_accuracy,
            "c_auc": c_auc,
            "c_f1": c_f1,
            "y_accuracy": y_accuracy,
            "y_auc": y_auc,
            "y_f1": y_f1,
            "concept_loss": concept_loss_scalar,
            "task_loss": task_loss_scalar,
            "loss": loss.detach(),
            "avg_c_y_acc": (c_accuracy + y_accuracy) / 2,
        }
        if self.top_k_accuracy is not None:
            y_true = y.reshape(-1).cpu().detach()
            y_pred = y_logits.cpu().detach()
            labels = list(range(self.n_tasks))
            for top_k_val in self.top_k_accuracy:
                y_top_k_accuracy = sklearn.metrics.top_k_accuracy_score(
                    y_true,
                    y_pred,
                    k=top_k_val,
                    labels=labels,
                )
                result[f'y_top_{top_k_val}_accuracy'] = y_top_k_accuracy
        return loss, result

    def training_step(self, batch, batch_no):
        loss, result = self._run_step(batch, batch_no, train=True)
        for name, val in result.items():
            self.log(name, val, prog_bar=("accuracy" in name))
        return {
            "loss": loss,
            "log": {
                "c_accuracy": result['c_accuracy'],
                "c_auc": result['c_auc'],
                "c_f1": result['c_f1'],
                "y_accuracy": result['y_accuracy'],
                "y_auc": result['y_auc'],
                "y_f1": result['y_f1'],
                "concept_loss": result['concept_loss'],
                "task_loss": result['task_loss'],
                "loss": result['loss'],
                "avg_c_y_acc": result['avg_c_y_acc'],
            },
        }

    def validation_step(self, batch, batch_no):
        loss, result = self._run_step(batch, batch_no, train=False)
        for name, val in result.items():
            self.log("val_" + name, val, prog_bar=("accuracy" in name))
        return {
            "val_" + key: val
            for key, val in result.items()
        }

    def test_step(self, batch, batch_no):
        loss, result = self._run_step(batch, batch_no, train=False)
        for name, val in result.items():
            self.log("test_" + name, val, prog_bar=True)
        return result['loss']

    def configure_optimizers(self):
        if self.optimizer_name.lower() == "adam":
            optimizer = torch.optim.Adam(
                self.parameters(),
                lr=self.learning_rate,
                weight_decay=self.weight_decay,
            )
        else:
            optimizer = torch.optim.SGD(
                filter(lambda p: p.requires_grad, self.parameters()),
                lr=self.learning_rate,
                momentum=self.momentum,
                weight_decay=self.weight_decay,
            )
        lr_scheduler = torch.optim.lr_scheduler.ReduceLROnPlateau(optimizer)
        return {
            "optimizer": optimizer,
            "lr_scheduler": lr_scheduler,
            "monitor": "loss",
        }


################################################################################
## OUR MODEL
################################################################################


class ConceptEmbeddingModel(ConceptBottleneckModel):
    def __init__(
        self,
        n_concepts,
        n_tasks,
        emb_size=16,
        concept_loss_weight=1,
        task_loss_weight=1,
        momentum=0.9,
        learning_rate=0.01,
        weight_decay=4e-05,
        weight_loss=None,
        normalize_loss=False,
        pretrain_model=True,
        c_extractor_arch=resnet50,
        optimizer="adam",
        shared_prob_gen=False,
        top_k_accuracy=2,
        intervention_idxs=None,
        sigmoidal_prob=False,
        sigmoidal_embedding=False,
        adversarial_intervention=False,
        training_intervention_prob=0.0,
        active_intervention_values=None,
        inactive_intervention_values=None,
        embeding_activation=None,
        concat_prob=False,
    ):
        pl.LightningModule.__init__(self)
        try:
            self.pre_concept_model = c_extractor_arch(
                pretrained=pretrain_model
            )
        except:
            self.pre_concept_model = c_extractor_arch(output_dim=n_concepts)
        self.training_intervention_prob = training_intervention_prob
        if self.training_intervention_prob != 0:
            self.ones = torch.ones(n_concepts)

        if active_intervention_values is not None:
            self.active_intervention_values = torch.tensor(
                active_intervention_values
            )
        else:
            self.active_intervention_values = torch.ones(n_concepts) * (
                5.0 if not sigmoidal_prob else 1.0
            )
        if inactive_intervention_values is not None:
            self.inactive_intervention_values = torch.tensor(
                inactive_intervention_values
            )
        else:
            self.inactive_intervention_values = torch.ones(n_concepts) * (
                -5.0 if not sigmoidal_prob else 0.0
            )
        self.concat_prob = concat_prob
        self.task_loss_weight = task_loss_weight
        self.concept_context_generators = torch.nn.ModuleList()
        self.concept_prob_generators = torch.nn.ModuleList()
        self.shared_prob_gen = shared_prob_gen
        self.top_k_accuracy = top_k_accuracy
        self.intervention_idxs = intervention_idxs
        self.adversarial_intervention = adversarial_intervention
        for i in range(n_concepts):
            if embeding_activation is None:
                self.concept_context_generators.append(
                    torch.nn.Linear(
                        list(
                            self.pre_concept_model.modules()
                        )[-1].out_features,
                        # Two as each concept will have a positive and a
                        # negative embedding portion which are later mixed
                        2 * emb_size,
                    )
                )
            elif embeding_activation == "leakyrelu" :
                self.concept_context_generators.append(
                    torch.nn.Sequential(*[
                        torch.nn.Linear(
                            list(
                                self.pre_concept_model.modules()
                            )[-1].out_features,
                            # Two as each concept will have a positive and a
                            # negative embedding portion which are later mixed
                            2 * emb_size,
                        ),
                        torch.nn.LeakyReLU(),
                    ])
                )
            elif embeding_activation == "relu" :
                self.concept_context_generators.append(
                    torch.nn.Sequential(*[
                        torch.nn.Linear(
                            list(
                                self.pre_concept_model.modules()
                            )[-1].out_features,
                            # Two as each concept will have a positive and a
                            # negative embedding portion which are later mixed
                            2 * emb_size,
                        ),
                        torch.nn.ReLU(),
                    ])
                )
            if self.shared_prob_gen and (
                len(self.concept_prob_generators) == 0
            ):
                # Then we will use one and only one probability generator which
                # will be shared among all concepts. This will force concept
                # embedding vectors to be pushed into the same latent space
                self.concept_prob_generators.append(
                    torch.nn.Linear(
                        2 * emb_size,
                        1,
                    )
                )
            elif not self.shared_prob_gen:
                self.concept_prob_generators.append(
                    torch.nn.Linear(
                        2 * emb_size,
                        1,
                    )
                )
        self.c2y_model = torch.nn.Sequential(*[
            torch.nn.Linear(
                n_concepts * (emb_size + int(concat_prob)),
                n_tasks,
            ),
        ])
        self.sig = torch.nn.Sigmoid()

        self.loss_concept = torch.nn.BCELoss(weight=weight_loss)
        self.loss_task = (
            torch.nn.CrossEntropyLoss()
            if n_tasks > 1 else torch.nn.BCEWithLogitsLoss()
        )
        self.concept_loss_weight = concept_loss_weight
        self.momentum = momentum
        self.learning_rate = learning_rate
        self.weight_decay = weight_decay
        self.normalize_loss = normalize_loss
        self.optimizer_name = optimizer
        self.n_tasks = n_tasks
        self.sigmoidal_prob = sigmoidal_prob
        self.sigmoidal_embedding = sigmoidal_embedding
        self.emb_size = emb_size

    def _after_interventions(
        self,
        prob,
        concept_idx,
        intervention_idxs=None,
        c_true=None,
        train=False,
    ):
        if train and (self.training_intervention_prob != 0) and (
            intervention_idxs is None
        ):
            # Then we will probabilistically intervene in some concepts
            mask = torch.bernoulli(self.ones * self.training_intervention_prob)
            intervention_idxs = torch.nonzero(mask).reshape(-1)
        if (c_true is None) or (intervention_idxs is None):
            return prob
        if concept_idx not in intervention_idxs:
            return prob
        c_true = self._switch_concepts(c_true)
        if self.sigmoidal_prob:
            return c_true[:, concept_idx:concept_idx+1]
        result = (
            (
                c_true[:, concept_idx:concept_idx+1] *
                self.active_intervention_values[concept_idx]
            ) +
            (
                (c_true[:, concept_idx:concept_idx+1] - 1) *
                -self.inactive_intervention_values[concept_idx]
            )
        )
        return result

    def _forward(self, x, intervention_idxs=None, c=None, train=False):
        pre_c = self.pre_concept_model(x)
        probs = []
        contexts = []
        full_vectors = []
        sem_probs = []
        for i, context_gen in enumerate(self.concept_context_generators):
            if self.shared_prob_gen:
                prob_gen = self.concept_prob_generators[0]
            else:
                prob_gen = self.concept_prob_generators[i]
            context = context_gen(pre_c)
            if self.sigmoidal_embedding:
                context = self.sig(context)

            prob = prob_gen(context)
            sem_probs.append(self.sig(prob))
            if self.sigmoidal_prob:
                prob = self.sig(prob)
            prob = self._after_interventions(
                prob,
                concept_idx=i,
                intervention_idxs=intervention_idxs,
                c_true=c,
                train=train,
            )
            probs.append(prob)
            # Then time to mix!
            context_pos = context[:, :self.emb_size]
            context_neg = context[:, self.emb_size:]
            mask = prob if self.sigmoidal_prob else self.sig(prob)
            context = context_pos * mask + context_neg * (1 - mask)
            if self.concat_prob:
                # Then the probability bit will be added
                # as part of the bottleneck
                full_vectors.append(torch.cat(
                    [context, probs[i]],
                    axis=-1,
                ))
            else:
                # Otherwise, let's completely ignore the probability bit
                full_vectors.append(context)
        c_sem = torch.cat(sem_probs, axis=-1)
        c_pred = torch.cat(full_vectors, axis=-1)
        y = self.c2y_model(c_pred)
        return c_sem, c_pred, y


################################################################################
## HELPER FUNCTIONS
################################################################################

def compute_bin_accuracy(c_pred, y_pred, c_true, y_true):
    c_pred = c_pred.reshape(-1).cpu().detach() > 0.5
    y_probs = y_pred.cpu().detach()
    y_pred = y_probs > 0.5
    c_true = c_true.reshape(-1).cpu().detach()
    y_true = y_true.reshape(-1).cpu().detach()
    c_accuracy = sklearn.metrics.accuracy_score(c_true, c_pred)
    c_auc = sklearn.metrics.roc_auc_score(c_true, c_pred, multi_class='ovo')
    c_f1 = sklearn.metrics.f1_score(c_true, c_pred, average='macro')
    y_accuracy = sklearn.metrics.accuracy_score(y_true, y_pred)
    y_auc = sklearn.metrics.roc_auc_score(y_true, y_probs)
    y_f1 = sklearn.metrics.f1_score(y_true, y_pred)
    return (c_accuracy, c_auc, c_f1), (y_accuracy, y_auc, y_f1)


def compute_accuracy(
    c_pred,
    y_pred,
    c_true,
    y_true,
):
    if (len(y_pred.shape) < 2) or (y_pred.shape[-1] == 1):
        return compute_bin_accuracy(
            c_pred,
            y_pred,
            c_true,
            y_true,
        )
    c_pred = c_pred.reshape(-1).cpu().detach() > 0.5
    y_probs = torch.nn.Softmax(dim=-1)(y_pred).cpu().detach()
    used_classes = np.unique(y_true.reshape(-1).cpu().detach())
    y_probs = y_probs[:, sorted(list(used_classes))]
    y_pred = y_pred.argmax(dim=-1).cpu().detach()
    c_true = c_true.reshape(-1).cpu().detach()
    y_true = y_true.reshape(-1).cpu().detach()
    c_accuracy = sklearn.metrics.accuracy_score(c_true, c_pred)
    try:
        c_auc = sklearn.metrics.roc_auc_score(
            c_true,
            c_pred,
            multi_class='ovo',
        )
    except:
        c_auc = 0.0
    try:
        c_f1 = sklearn.metrics.f1_score(
            c_true,
            c_pred,
            average='macro',
        )
    except:
        c_f1 = 0
    y_accuracy = sklearn.metrics.accuracy_score(y_true, y_pred)
    try:
        y_auc = sklearn.metrics.roc_auc_score(
            y_true,
            y_probs,
            multi_class='ovo',
        )
    except:
        y_auc = 0.0
    try:
        y_f1 = sklearn.metrics.f1_score(y_true, y_pred, average='macro')
    except:
        y_f1 = 0.0
    return (c_accuracy, c_auc, c_f1), (y_accuracy, y_auc, y_f1)
