# Supplementary material
Source: ML conference proceedings conference paper supplement (https://proceedings.neurips.cc/paper_files/paper/2022/hash/867c06823281e506e8059f5c13a57f75-Abstract.html)
Supplement: Supplementary file 1 [file 867c06823281e506e8059f5c13a57f75-Supplemental-Conference.zip › SupplementaryMaterial/code/core/results_plots.ipynb]

# %% [code]
%load_ext autoreload
%load_ext tensorboard
%matplotlib inline

# %% [code]
import matplotlib
import numpy as np
import os
import random
import tensorflow as tf
import yaml
import matplotlib.pyplot as plt
import numpy as np
from matplotlib import rc
from matplotlib import cm
import seaborn as sns
from importlib import reload
from pathlib import Path
import sklearn
from tensorflow.keras.models import load_model
from joblib import dump, load
import pandas as pd

# %% [code]
################################################################################
## Global Variables Defining Experiment Flow
################################################################################

LATEX_SYMBOL = "$"
RESULTS_DIR = "results/"
rc('text', usetex=(LATEX_SYMBOL == "$"))
plt.style.use('seaborn-whitegrid')

# %% [code]
from joblib import dump, load
xor_results = load(
    os.path.join(
        RESULTS_DIR,
        "xor/results.joblib",
    )
)

trig_results = load(
    os.path.join(
        RESULTS_DIR,
        "trig/results.joblib",
    )
)

vec_results = load(
    os.path.join(
        RESULTS_DIR,
        "dot/results.joblib",
    )
)

cub_results = load(
    os.path.join(
        RESULTS_DIR,
        "cub/results.joblib",
    )
)


celeba_bin_results = load(
    os.path.join(
        RESULTS_DIR,
        "celeba/results.joblib"
    )
)


# %% [code]
def get_mean_and_std(results, var, map_fn=lambda x: x):
    vals = []
    for _, collected in results.items():
        vals.append(map_fn(collected[var]))
    return np.mean(vals), np.std(vals)

def bold_text(x):
    if LATEX_SYMBOL == "$":
        return r"$\textbf{" + x + "}$"
    return x

OUR_NAME_REG = "CEM (ours)"
OUR_NAME_NO_REG = "CEM without RandInt (ours)"
OUR_MODEL_REG = "MixtureEmbModelSharedProb_AdaptiveDropout_NoProbConcat"
OUR_MODEL_NO_REG = "MixtureEmbModelSharedProb_Adaptive_NoProbConcat"
HYBRID_MODEL = "ConceptBottleneckModelFuzzyExtraCapacity_LogitOnlyProb"
HYBRID_MODEL_REAL_WORLD = "ConceptBottleneckModelFuzzyExtraCapacity_Logit"

clrs = sns.color_palette("colorblind", 30)
color_map = {
    'No Concepts': clrs[7],
    'Bool': clrs[2],
    'Bool-CBM': clrs[2],
    "Sequential": clrs[3],
    "Sequential-CBM": clrs[3],
    "Independent": clrs[4],
    "Independent-CBM": clrs[4],
    'Fuzzy': clrs[5],
    'Fuzzy-CBM': clrs[5],
    'Hybrid': clrs[6],
    'Hybrid-CBM': clrs[6],
    OUR_NAME_NO_REG: clrs[9],
    OUR_NAME_REG: clrs[10],
}

# %% [markdown]
# Performance Summary Plots

# %% [code]
# Plot concept accuracies for all methods
# Set up our figure

fig_width = 20
fig_height = 8

scale = 1
trials = 5
fig, axs = plt.subplots(2, 5, figsize=(fig_width, fig_height))

all_models = [
    (
        "No Concepts",
        xor_results,
        'ConceptBottleneckModelNoConceptSupervisionReLU_ExtraCapacity',
        'test_acc_y',
        lambda x: x*100,
    ),
    (
        "Bool-CBM",
        xor_results,
        'ConceptBottleneckModelBool',
        'test_acc_y',
        lambda x: x*100,
    ),
    (
        "Fuzzy-CBM",
        xor_results,
        'ConceptBottleneckModelFuzzy',
        'test_acc_y',
        lambda x: x*100,
    ),
    (
        "Hybrid-CBM",
        xor_results,
        HYBRID_MODEL,
        'test_acc_y',
        lambda x: x*100,
    ),
    (
        OUR_NAME_NO_REG,
        xor_results,
        OUR_MODEL_NO_REG,
        'test_acc_y',
        lambda x: x*100,
    ),
    (
        OUR_NAME_REG,
        xor_results,
        OUR_MODEL_REG,
        'test_acc_y',
        lambda x: x*100,
    ),
]
num_models = len(all_models) + 1
ax = axs[0, 0]

for i, (method_name, results, kword, variable, transform_fn) in enumerate(all_models):
    if method_name not in color_map:
        color_map[method_name] = clrs[2*len(color_map)]
    color = color_map[method_name]
    mean, std = get_mean_and_std(results, f'{variable}_{kword}', transform_fn)
    accs_means = np.array([mean])
    accs_stds = np.array([std])
    ax.bar(
        i,
        accs_means,
        width=1,
        color=color,
        align='center',
        label=method_name,
        yerr=2*accs_stds,
        capsize=5,
        edgecolor="black",
        hatch="/" if "NoConceptSupervision" in kword else None,
    )
ax.set_ylabel("Task Accuracy (%)", fontsize=20)
# ax.set_xlabel("$\delta$", fontsize=25)
ax.set_title(bold_text("XOR"), fontsize=30)
ax.set_xticks([])
# ax.set_xticklabels(list(map(lambda x: f"{0.1 * x:.1f}", all_vars)), fontsize=25)
ax.set_yticks(np.arange(40, 105, 5))
ax.set_yticklabels(list(map(lambda x: f"{x}", np.arange(40, 105, 5))), fontsize=15)
ax.set_ylim((40, 105))
# ax.set_yticklabels(list(map(lambda x: f"{x:.1f}", np.arange(0, 0.9, 0.2))), fontsize=18)
ax.grid(axis='y')
ax.grid(True)
handles, labels = ax.get_legend_handles_labels()


all_models = [
    (
        "No Concepts",
        trig_results,
        'ConceptBottleneckModelNoConceptSupervisionReLU_ExtraCapacity',
        'test_acc_y',
        lambda x: x*100,
    ),
    (
        "Bool-CBM",
        trig_results,
        'ConceptBottleneckModelBool',
        'test_acc_y',
        lambda x: x*100,
    ),
    (
        "Fuzzy-CBM",
        trig_results,
        'ConceptBottleneckModelFuzzy',
        'test_acc_y',
        lambda x: x*100,
    ),
    (
        "Hybrid-CBM",
        trig_results,
        HYBRID_MODEL,
        'test_acc_y',
        lambda x: x*100,
    ),
    (
        OUR_NAME_NO_REG,
        trig_results,
        OUR_MODEL_NO_REG,
        'test_acc_y',
        lambda x: x*100,
    ),
    (
        OUR_NAME_REG,
        trig_results,
        OUR_MODEL_REG,
        'test_acc_y',
        lambda x: x*100,
    ),
]
num_models = len(all_models) + 2
ax = axs[0, 1]

for i, (method_name, results, kword, variable, transform_fn) in enumerate(all_models):
    if method_name not in color_map:
        color_map[method_name] = clrs[2*len(color_map)]
    color = color_map[method_name]
    mean, std = get_mean_and_std(results, f'{variable}_{kword}', transform_fn)
    accs_means = np.array([mean])
    accs_stds = np.array([std])
    ax.bar(
        i,
        accs_means,
        width=1,
        color=color,
        align='center',
        label=method_name,
        yerr=2*accs_stds,
        capsize=5,
        edgecolor="black",
        hatch="/" if "NoConceptSupervision" in kword else None,
    )
    
# ax.set_ylabel("Oracle Impurity Score", fontsize=25)
# ax.set_xlabel("$\lambda$", fontsize=25)
ax.set_title(bold_text("Trigonometry"), fontsize=30)
ax.set_xticks([])
ax.set_xticklabels([], fontsize=25)
ax.set_yticks(np.arange(40, 105, 5))
ax.set_yticklabels(list(map(lambda x: f"{x}", np.arange(40, 105, 5))), fontsize=15)
ax.set_ylim((40, 105))
# ax.set_yticklabels(list(map(lambda x: f"{x:.1f}", np.arange(0, 0.9, 0.2))), fontsize=18)
ax.grid(axis='y')
ax.grid(True)
handles, labels = ax.get_legend_handles_labels()

all_models = [
    (
        "No Concepts",
        vec_results,
        'ConceptBottleneckModelNoConceptSupervisionReLU_ExtraCapacity',
        'test_acc_y',
        lambda x: x*100,
    ),
    (
        "Bool-CBM",
        vec_results,
        'ConceptBottleneckModelBool',
        'test_acc_y',
        lambda x: x*100,
    ),
    (
        "Fuzzy-CBM",
        vec_results,
        'ConceptBottleneckModelFuzzy',
        'test_acc_y',
        lambda x: x*100,
    ),
    (
        "Hybrid-CBM",
        vec_results,
        HYBRID_MODEL,
        'test_acc_y',
        lambda x: x*100,
    ),
    (
        OUR_NAME_NO_REG,
        vec_results,
        OUR_MODEL_NO_REG,
        'test_acc_y',
        lambda x: x*100,
    ),
    (
        OUR_NAME_REG,
        vec_results,
        OUR_MODEL_REG,
        'test_acc_y',
        lambda x: x*100,
    ),
]
num_models = len(all_models) + 2
ax = axs[0, 2]

for i, (method_name, results, kword, variable, transform_fn) in enumerate(all_models):
    if method_name not in color_map:
        color_map[method_name] = clrs[2*len(color_map)]
    color = color_map[method_name]
    mean, std = get_mean_and_std(results, f'{variable}_{kword}', transform_fn)
    accs_means = np.array([mean])
    accs_stds = np.array([std])
    ax.bar(
        i,
        accs_means,
        width=1,
        color=color,
        align='center',
        label=method_name,
        yerr=2*accs_stds,
        capsize=5,
        edgecolor="black",
        hatch="/" if "NoConceptSupervision" in kword else None,
    )
# ax.set_ylabel("Oracle Impurity Score", fontsize=25)
# ax.set_xlabel("$\lambda$", fontsize=25)
ax.set_title(bold_text("Dot"), fontsize=30)
ax.set_xticks([])
ax.set_xticklabels([], fontsize=25)
ax.set_yticks(np.arange(40, 105, 5))
ax.set_yticklabels(list(map(lambda x: f"{x}", np.arange(40, 105, 5))), fontsize=15)
ax.set_ylim((40, 105))
# ax.set_yticklabels(list(map(lambda x: f"{x:.1f}", np.arange(0, 0.9, 0.2))), fontsize=18)
ax.grid(axis='y')
ax.grid(True)


all_models = [
    (
        "No Concepts",
        cub_results,
        'ConceptBottleneckModelNoConceptSupervisionReLU_ExtraCapacity',
        'test_acc_y',
        lambda x: x*100,
    ),
    (
        "Bool-CBM",
        cub_results,
        'ConceptBottleneckModelBool',
        'test_acc_y',
        lambda x: x*100,
    ),
    (
        "Fuzzy-CBM",
        cub_results,
        'ConceptBottleneckModelFuzzy',
        'test_acc_y',
        lambda x: x*100,
    ),
    (
        "Hybrid-CBM",
        cub_results,
        HYBRID_MODEL_REAL_WORLD,
        'test_acc_y',
        lambda x: x*100,
    ),
    (
        OUR_NAME_NO_REG,
        cub_results,
        OUR_MODEL_NO_REG,
        'test_acc_y',
        lambda x: x*100,
    ),
    (
        OUR_NAME_REG,
        cub_results,
        OUR_MODEL_REG,
        'test_acc_y',
        lambda x: x*100,
    ),
]
num_models = len(all_models) + 2
ax = axs[0, 3]

for i, (method_name, results, kword, variable, transform_fn) in enumerate(all_models):
    if method_name not in color_map:
        color_map[method_name] = clrs[2*len(color_map)]
    color = color_map[method_name]
    mean, std = get_mean_and_std(results, f'{variable}_{kword}', transform_fn)
    accs_means = np.array([mean])
    accs_stds = np.array([std])
    ax.bar(
        i,
        accs_means,
        width=1,
        color=color,
        align='center',
        label=method_name,
        yerr=2*accs_stds,
        capsize=5,
        edgecolor="black",
        hatch="/" if "NoConceptSupervision" in kword else None,
    )
ax.set_title(bold_text("CUB"), fontsize=30)
ax.set_xticks([])
ax.set_xticklabels([], fontsize=25)
ax.set_yticks(np.arange(40, 105, 5))
ax.set_yticklabels(list(map(lambda x: f"{x}", np.arange(40, 105, 5))), fontsize=15)
ax.set_ylim((40, 105))
# ax.set_yticklabels(list(map(lambda x: f"{x:.1f}", np.arange(0, 0.9, 0.2))), fontsize=18)
ax.grid(axis='y')
ax.grid(True)
handles, labels = ax.get_legend_handles_labels()


all_models = [
    (
        "No Concepts",
        celeba_bin_results,
        'ConceptBottleneckModelNoConceptSupervisionReLU_ExtraCapacity',
        'test_acc_y',
        lambda x: x*100,
    ),
    (
        "Bool-CBM",
        celeba_bin_results,
        'ConceptBottleneckModelBool',
        'test_acc_y',
        lambda x: x*100,
    ),
    (
        "Fuzzy-CBM",
        celeba_bin_results,
        'ConceptBottleneckModelFuzzy',
        'test_acc_y',
        lambda x: x*100,
    ),
    (
        "Hybrid-CBM",
        celeba_bin_results,
        HYBRID_MODEL_REAL_WORLD,
        'test_acc_y',
        lambda x: x*100,
    ),
     (
        OUR_NAME_NO_REG,
        celeba_bin_results,
        OUR_MODEL_NO_REG,
        'test_acc_y',
        lambda x: x*100,
    ),
    (
        OUR_NAME_REG,
        celeba_bin_results,
        OUR_MODEL_REG,
        'test_acc_y',
        lambda x: x*100,
    ),
]
num_models = len(all_models) + 2
ax = axs[0, 4]

for i, (method_name, results, kword, variable, transform_fn) in enumerate(all_models):
    if method_name not in color_map:
        color_map[method_name] = clrs[2*len(color_map)]
    color = color_map[method_name]
    mean, std = get_mean_and_std(results, f'{variable}_{kword}', transform_fn)
    accs_means = np.array([mean])
    accs_stds = np.array([std])
    ax.bar(
        i,
        accs_means,
        width=1,
        color=color,
        align='center',
        label=method_name,
        yerr=2*accs_stds,
        capsize=5,
        edgecolor="black",
        hatch="/" if "NoConceptSupervision" in kword else None,
    )
ax.set_title(bold_text("CelebA"), fontsize=30)
ax.set_xticks([])
ax.set_xticklabels([], fontsize=25)
ax.set_yticks(np.arange(10, 36, 2))
ax.set_yticklabels(list(map(lambda x: f"{x}", np.arange(10, 36, 2))), fontsize=15)
ax.set_ylim((10, 36))
# ax.set_yticklabels(list(map(lambda x: f"{x:.1f}", np.arange(0, 0.9, 0.2))), fontsize=18)
ax.grid(axis='y')
ax.grid(True)
# handles, labels = ax.get_legend_handles_labels()


all_models = [
    (
        "Bool-CBM",
        xor_results,
        'ConceptBottleneckModelBool',
        'test_acc_c',
        lambda x: x*100,
    ),
    (
        "Fuzzy-CBM",
        xor_results,
        'ConceptBottleneckModelFuzzy',
        'test_acc_c',
        lambda x: x*100,
    ),
    (
        "Hybrid-CBM",
        xor_results,
        HYBRID_MODEL,
        'test_acc_c',
        lambda x: x*100,
    ),
    (
        OUR_NAME_NO_REG,
        xor_results,
        OUR_MODEL_NO_REG,
        'test_acc_c',
        lambda x: x*100,
    ),
    (
        OUR_NAME_REG,
        xor_results,
        OUR_MODEL_REG,
        'test_acc_c',
        lambda x: x*100,
    ),
]

num_models = len(all_models) + 1
ax = axs[1, 0]

for i, (method_name, results, kword, variable, transform_fn) in enumerate(all_models):
    if method_name not in color_map:
        color_map[method_name] = clrs[2*len(color_map)]
    color = color_map[method_name]
    mean, std = get_mean_and_std(results, f'{variable}_{kword}', transform_fn)
    accs_means = np.array([mean])
    accs_stds = np.array([std])
    ax.bar(
        i,
        accs_means,
        width=1,
        color=color,
        align='center',
        label=method_name,
        yerr=2*accs_stds,
        capsize=5,
        edgecolor="black",
    )
ax.set_ylabel("Concept Accuracy (%)", fontsize=20)
ax.set_xticks([]) #np.arange(0, len(all_vars)))
ax.set_xticklabels([], fontsize=25)
# ax.set_yticks(np.arange(90, 101, 2))
# ax.set_yticklabels(list(map(lambda x: f"{x}", np.arange(90, 101, 2))), fontsize=15)
# ax.set_ylim((90, 100))
ax.set_yticks(np.arange(40, 101, 5))
ax.set_yticklabels(list(map(lambda x: f"{x}", np.arange(40, 101, 5))), fontsize=15)
ax.set_ylim((40, 105))
ax.grid(axis='y')
ax.grid(True)


all_models = [
    (
        "Bool-CBM",
        trig_results,
        'ConceptBottleneckModelBool',
        'test_acc_c',
        lambda x: x*100,
    ),
    (
        "Fuzzy-CBM",
        trig_results,
        'ConceptBottleneckModelFuzzy',
        'test_acc_c',
        lambda x: x*100,
    ),
    (
        "Hybrid-CBM",
        trig_results,
        HYBRID_MODEL,
        'test_acc_c',
        lambda x: x*100,
    ),
    (
        OUR_NAME_NO_REG,
        trig_results,
        OUR_MODEL_NO_REG,
        'test_acc_c',
        lambda x: x*100,
    ),
    (
        OUR_NAME_REG,
        trig_results,
        OUR_MODEL_REG,
        'test_acc_c',
        lambda x: x*100,
    ),
]
num_models = len(all_models) + 2
ax = axs[1, 1]

for i, (method_name, results, kword, variable, transform_fn) in enumerate(all_models):
    if method_name not in color_map:
        color_map[method_name] = clrs[2*len(color_map)]
    color = color_map[method_name]
    mean, std = get_mean_and_std(results, f'{variable}_{kword}', transform_fn)
    accs_means = np.array([mean])
    accs_stds = np.array([std])
    ax.bar(
        i,
        accs_means,
        width=1,
        color=color,
        align='center',
        label=method_name,
        yerr=2*accs_stds,
        capsize=5,
        edgecolor="black",
    )
    
ax.set_xticks([])
ax.set_xticklabels([], fontsize=25)
# ax.set_yticks(np.arange(90, 101, 2))
# ax.set_yticklabels(list(map(lambda x: f"{x}", np.arange(90, 101, 2))), fontsize=15)
# ax.set_ylim((90, 100))
ax.set_yticks(np.arange(40, 101, 5))
ax.set_yticklabels(list(map(lambda x: f"{x}", np.arange(40, 101, 5))), fontsize=15)
ax.set_ylim((40, 105))
# ax.set_yticklabels(list(map(lambda x: f"{x:.1f}", np.arange(0, 0.9, 0.2))), fontsize=18)
ax.grid(axis='y')
ax.grid(True)

all_models = [
    (
        "Bool-CBM",
        vec_results,
        'ConceptBottleneckModelBool',
        'test_acc_c',
        lambda x: x*100,
    ),
    (
        "Fuzzy-CBM",
        vec_results,
        'ConceptBottleneckModelFuzzy',
        'test_acc_c',
        lambda x: x*100,
    ),
    (
        "Hybrid-CBM",
        vec_results,
        HYBRID_MODEL,
        'test_acc_c',
        lambda x: x*100,
    ),
    (
        OUR_NAME_NO_REG,
        vec_results,
        OUR_MODEL_NO_REG,
        'test_acc_c',
        lambda x: x*100,
    ),
    (
        OUR_NAME_REG,
        vec_results,
        OUR_MODEL_REG,
        'test_acc_c',
        lambda x: x*100,
    ),
]
num_models = len(all_models) + 2
ax = axs[1, 2]

for i, (method_name, results, kword, variable, transform_fn) in enumerate(all_models):
    if method_name not in color_map:
        color_map[method_name] = clrs[2*len(color_map)]
    color = color_map[method_name]
    mean, std = get_mean_and_std(results, f'{variable}_{kword}', transform_fn)
    accs_means = np.array([mean])
    accs_stds = np.array([std])
    ax.bar(
        i,
        accs_means,
        width=1,
        color=color,
        align='center',
        label=method_name,
        yerr=2*accs_stds,
        capsize=5,
        edgecolor="black",
    )
# ax.set_ylabel("Oracle Impurity Score", fontsize=25)
# ax.set_xlabel("$\lambda$", fontsize=25)
ax.set_xticks([])
ax.set_xticklabels([], fontsize=25)
# ax.set_yticks(np.arange(90, 101, 2))
# ax.set_yticklabels(list(map(lambda x: f"{x}", np.arange(90, 101, 2))), fontsize=15)
# ax.set_ylim((90, 100))
ax.set_yticks(np.arange(40, 101, 5))
ax.set_yticklabels(list(map(lambda x: f"{x}", np.arange(40, 101, 5))), fontsize=15)
ax.set_ylim((40, 105))
# ax.set_yticklabels(list(map(lambda x: f"{x:.1f}", np.arange(0, 0.9, 0.2))), fontsize=18)
ax.grid(axis='y')
ax.grid(True)


all_models = [
    (
        "Bool-CBM",
        cub_results,
        'ConceptBottleneckModelBool',
        'test_acc_c',
        lambda x: x*100,
    ),
    (
        "Fuzzy-CBM",
        cub_results,
        'ConceptBottleneckModelFuzzy',
        'test_acc_c',
        lambda x: x*100,
    ),
    (
        "Hybrid-CBM",
        cub_results,
        HYBRID_MODEL_REAL_WORLD,
        'test_acc_c',
        lambda x: x*100,
    ),
    (
        OUR_NAME_NO_REG,
        cub_results,
        OUR_MODEL_NO_REG,
        'test_acc_c',
        lambda x: x*100,
    ),
    (
        OUR_NAME_REG,
        cub_results,
        OUR_MODEL_REG,
        'test_acc_c',
        lambda x: x*100,
    ),
    
]
num_models = len(all_models) + 2
ax = axs[1, 3]

for i, (method_name, results, kword, variable, transform_fn) in enumerate(all_models):
    if method_name not in color_map:
        color_map[method_name] = clrs[2*len(color_map)]
    color = color_map[method_name]
    mean, std = get_mean_and_std(results, f'{variable}_{kword}', transform_fn)
    accs_means = np.array([mean])
    accs_stds = np.array([std])
    ax.bar(
        i,
        accs_means,
        width=1,
        color=color,
        align='center',
        label=method_name,
        yerr=2*accs_stds,
        capsize=5,
        edgecolor="black",
    )
ax.set_xticks([])
ax.set_xticklabels([], fontsize=25)
# ax.set_yticks(np.arange(90, 101, 2))
# ax.set_yticklabels(list(map(lambda x: f"{x}", np.arange(90, 101, 2))), fontsize=15)
# ax.set_ylim((90, 100))
ax.set_yticks(np.arange(40, 101, 5))
ax.set_yticklabels(list(map(lambda x: f"{x}", np.arange(40, 101, 5))), fontsize=15)
ax.set_ylim((40, 105))
# ax.set_yticklabels(list(map(lambda x: f"{x:.1f}", np.arange(0, 0.9, 0.2))), fontsize=18)
ax.grid(axis='y')
ax.grid(True)


all_models = [
    (
        "Bool-CBM",
        celeba_bin_results,
        'ConceptBottleneckModelBool',
        'test_acc_c',
        lambda x: x*100,
    ),
    (
        "Fuzzy-CBM",
        celeba_bin_results,
        'ConceptBottleneckModelFuzzy',
        'test_acc_c',
        lambda x: x*100,
    ),
    (
        "Hybrid-CBM",
        celeba_bin_results,
        HYBRID_MODEL_REAL_WORLD,
        'test_acc_c',
        lambda x: x*100,
    ),
    (
        OUR_NAME_NO_REG,
        celeba_bin_results,
        OUR_MODEL_NO_REG,
        'test_acc_c',
        lambda x: x*100,
    ),
    (
        OUR_NAME_REG,
        celeba_bin_results,
        OUR_MODEL_REG,
        'test_acc_c',
        lambda x: x*100,
    ),
    
]
num_models = len(all_models) + 2
ax = axs[1, 4]

for i, (method_name, results, kword, variable, transform_fn) in enumerate(all_models):
    if method_name not in color_map:
        color_map[method_name] = clrs[2*len(color_map)]
    color = color_map[method_name]
    mean, std = get_mean_and_std(results, f'{variable}_{kword}', transform_fn)
    accs_means = np.array([mean])
    accs_stds = np.array([std])
    ax.bar(
        i,
        accs_means,
        width=1,
        color=color,
        align='center',
        label=method_name,
        yerr=2*accs_stds,
        capsize=5,
        edgecolor="black",
    )
ax.set_xticks([])
ax.set_xticklabels([], fontsize=25)
ax.set_yticks(np.arange(40, 101, 5))
ax.set_yticklabels(list(map(lambda x: f"{x}", np.arange(40, 101, 5))), fontsize=15)
ax.set_ylim((40, 105))
# ax.set_yticklabels(list(map(lambda x: f"{x:.1f}", np.arange(0, 0.9, 0.2))), fontsize=18)
ax.grid(axis='y')
ax.grid(True)


lgd = fig.legend(handles, labels, fontsize=18, loc='upper center', bbox_to_anchor=(0.5,0.11), ncol=6) #(num_models - 1)//3)
plt.show()

# %% [markdown]
# Concept Subsample Results

# %% [code]
from collections import defaultdict

cub_subsampling_results = load(
    os.path.join(
        RESULTS_DIR,
        "cub_subsample/results.joblib",
    )
)

metric = 'test_acc_y'
transform_fn = lambda x: 100 * x
y_model_means = defaultdict(list)
y_model_stds = defaultdict(list)
for sampling_percent, collected_results in cub_subsampling_results.items():
    for model_name, var_name in [
        ("No Concepts", "ConceptBottleneckModelNoConceptSupervisionReLU_ExtraCapacity"),
        ("Bool-CBM", "ConceptBottleneckModelBool"),
        ("Fuzzy-CBM", "ConceptBottleneckModelFuzzy"),
        ("Hybrid-CBM", "ConceptBottleneckModelFuzzyExtraCapacity_Logit"),
        (OUR_NAME_REG, OUR_MODEL_REG),
    ]:
        key = f'{metric}_{var_name}_subsample_{sampling_percent}'
        if key not in collected_results['0']:
            key = f'{metric}_{var_name}_{sampling_percent}'
        mean, std = get_mean_and_std(
            collected_results,
            key,
            transform_fn,
        )
        y_model_means[model_name].append(np.array(mean))
        y_model_stds[model_name].append(np.array(std))

fig, ax = plt.subplots(figsize=(10, 6))
for i, (model_name, means) in enumerate(y_model_means.items()):
    print(model_name)
    stds = np.array(y_model_stds[model_name])
    print(stds)
    print(means)
    x_vals = list(map(lambda x: x*100, sorted(cub_subsampling_results.keys())))
    print(x_vals)
    print()
    if model_name not in color_map:
        color_map[model_name] = clrs[len(color_map)]
    color = color_map[model_name]
    ax.plot(
        x_vals,
        means,
        c=color,
        zorder=1,
    )
    ax.scatter(
        x_vals,
        means,
        s=50,
        label=model_name,
        color=color,
        zorder=2,
    )
    ax.fill_between(
        x_vals,
        means - stds,
        means + stds,
        alpha=0.3,
        facecolor=color,
    )
ax.set_xlabel("Ground Truth Concepts Used In Training (%)", fontsize=20)
ax.set_ylabel("Task Accuracy (%)", fontsize=20)
xticks = np.arange(0, 110, 10)
ax.set_xticks(xticks)
ax.set_xticklabels(list(map(str, xticks)), fontsize=15)

yticks = np.arange(0, 85, 10)
ax.set_yticks(yticks)
ax.set_yticklabels(list(map(str, yticks)), fontsize=15)

ax.grid(False)
# fig.legend(loc='lower right', fontsize=18)
handles, labels = ax.get_legend_handles_labels()


lgd = fig.legend(handles, labels, fontsize=18, loc='upper center', bbox_to_anchor=(0.5,0.05), ncol=3)

plt.title('CUB Concept Efficiency', fontsize=25)
sorted(cub_subsampling_results.keys())
plt.show()

# %% [code]
from collections import defaultdict

metric = 'test_acc_c'
transform_fn = lambda x: 100 * x
y_model_means = defaultdict(list)
y_model_stds = defaultdict(list)
for sampling_percent, collected_results in cub_subsampling_results.items():
    for model_name, var_name in [
        ("No Concepts", "ConceptBottleneckModelNoConceptSupervisionReLU_ExtraCapacity"),
        ("Bool-CBM", "ConceptBottleneckModelBool"),
        ("Fuzzy-CBM", "ConceptBottleneckModelFuzzy"),
        ("Hybrid-CBM", "ConceptBottleneckModelFuzzyExtraCapacity_Logit"),
        (OUR_NAME_REG, OUR_MODEL_REG),
    ]:
        key = f'{metric}_{var_name}_subsample_{sampling_percent}'
        if key not in collected_results['0']:
            key = f'{metric}_{var_name}_{sampling_percent}'
        mean, std = get_mean_and_std(
            collected_results,
            key,
            transform_fn,
        )
        y_model_means[model_name].append(np.array(mean))
        y_model_stds[model_name].append(np.array(std))

fig, ax = plt.subplots(figsize=(10, 8))
for i, (model_name, means) in enumerate(y_model_means.items()):
    print(model_name)
    stds = np.array(y_model_stds[model_name])
    print(stds)
    print(means)
    x_vals = list(map(lambda x: x*100, sorted(cub_subsampling_results.keys())))
    print(x_vals)
    print()
    if model_name not in color_map:
        color_map[model_name] = clrs[len(color_map)]
    color = color_map[model_name]
    ax.plot(
        x_vals,
        means,
        c=color,
        zorder=1,
    )
    ax.scatter(
        x_vals,
        means,
        s=50,
        label=model_name,
        color=color,
        zorder=2,
    )
    ax.fill_between(
        x_vals,
        means - stds,
        means + stds,
        alpha=0.3,
        facecolor=color,
    )
ax.set_xlabel("Ground Truth Concepts Used In Training (%)", fontsize=20)
ax.set_ylabel("Avg Concept Accuracy (%)", fontsize=20)
xticks = np.arange(0, 110, 10)
ax.set_xticks(xticks)
ax.set_xticklabels(list(map(str, xticks)), fontsize=15)

ax.set_ylim((75, 100))
yticks = np.arange(75, 101, 5)
ax.set_yticks(yticks)
ax.set_yticklabels(list(map(str, yticks)), fontsize=15)

ax.grid(False)
plt.title('CUB Concept Efficiency', fontsize=25)
fig.legend(loc='center', fontsize=18)
sorted(cub_subsampling_results.keys())
plt.show()

# %% [code]
from collections import defaultdict

metric = 'test_acc_y'
transform_fn = lambda x: 100 * x
y_model_means = defaultdict(list)
y_model_stds = defaultdict(list)
for sampling_percent, collected_results in cub_subsampling_results.items():
    for model_name, var_name in [
        ("CBM-Fuzzy", "ConceptBottleneckModelFuzzy"),
    ]:
        key = f'{metric}_{var_name}_subsample_{sampling_percent}'
        if key not in collected_results['0']:
            key = f'{metric}_{var_name}_{sampling_percent}'
        mean, std = get_mean_and_std(
            collected_results,
            key,
            transform_fn,
        )
        y_model_means[model_name].append(np.array(mean))
        y_model_stds[model_name].append(np.array(std))

fig, ax = plt.subplots(figsize=(4, 3))
for i, (model_name, means) in enumerate(y_model_means.items()):
    stds = np.array(y_model_stds[model_name])
    print(stds)
    print(means)
    x_vals = list(map(lambda x: x*100, sorted(cub_subsampling_results.keys())))
    print(x_vals)
    print()
    if model_name not in color_map:
        color_map[model_name] = clrs[len(color_map)]
    color = color_map[model_name]
    ax.plot(
        x_vals,
        means,
        c=color,
        zorder=1,
    )
    ax.scatter(
        x_vals,
        means,
        s=50,
        label=model_name,
        color=color,
        zorder=2,
    )
    ax.fill_between(
        x_vals,
        means - stds,
        means + stds,
        alpha=0.3,
        facecolor=color,
    )
ax.set_xlabel("Concepts Used In Training (%)", fontsize=13)
ax.set_ylabel("Task Accuracy (%)", fontsize=13)
xticks = np.arange(0, 110, 10)
ax.set_xticks(xticks)
ax.set_xticklabels(list(map(str, xticks)), fontsize=10)

yticks = np.arange(0, 85, 10)
ax.set_yticks(yticks)
ax.set_yticklabels(list(map(str, yticks)), fontsize=10)

ax.grid(False)
# fig.legend(loc='lower right', fontsize=18)
handles, labels = ax.get_legend_handles_labels()


plt.title('CBM Concept Efficiency (CUB)', fontsize=16)
plt.show()

# %% [markdown]
# Intervention Plots

# %% [code]
celeba_int_results = load(
    os.path.join(
        RESULTS_DIR,
        "celeba_bin_intervention/total_y_accs.joblib",
    )
)

celeba_adversarial_int_results = load(
    os.path.join(
        RESULTS_DIR,
        "celeba_bin_intervention/adversarial_total_y_accs.joblib",
    )
)

cub_int_results = load(
    os.path.join(
        RESULTS_DIR,
        "cub_intervention/total_y_accs.joblib",
    )
)


cub_adversarial_int_results = load(
    os.path.join(
        RESULTS_DIR,
        "cub_intervention/adversarial_total_y_accs.joblib",
    )
)


cub_groups = load(
    os.path.join(
        RESULTS_DIR,
        "cub_intervention/groups.joblib",
    )
)


# %% [code]
method_to_actual_name = {
    'ConceptBottleneckModelBool': 'Bool-CBM',
    'ConceptBottleneckModelFuzzy': 'Fuzzy-CBM',
#     'ConceptBottleneckModelFuzzyExtraCapacity_Logit': 'Hybrid-CBM',
#     'MixtureEmbModelSharedProb_Adaptive_NoProbConcat': "CEM without RandInt (ours)",
    "SequentialConceptBottleneckModel": "Sequential-CBM",
    "IndependentConceptBottleneckModel": "Independent-CBM",
    'MixtureEmbModelSharedProb_AdaptiveDropout_NoProbConcat': "CEM (ours)",
}

fig, axs = plt.subplots(1, 4, figsize=(16, 3))

for ax, (dataset_name, y_vals, x_vals, adversarial) in zip(axs, [
    ("CUB", cub_int_results, cub_groups, False),
    ("CelebA", celeba_int_results, np.arange(len(celeba_int_results)), False),
    ("CUB", cub_adversarial_int_results, cub_groups, True),
    ("CelebA", celeba_adversarial_int_results, np.arange(len(celeba_int_results)), True),
]):
    y_acc_means = [
        {
            method: np.mean(vals)
            for method, vals in results.items()
        } for results in y_vals
    ]
    y_acc_stds = [
        {
            method: np.std(vals)
            for method, vals in results.items()
        } for results in y_vals
    ]
    method_names = list(y_acc_means[-1].keys())
    print(y_acc_means[-1])


    for method_name in sorted(method_names):
        print(method_name)
        if method_name not in method_to_actual_name:
            continue
        means = np.array([item[method_name] * 100 for item in y_acc_means])
        stds = np.array([item[method_name] * 100 for item in y_acc_stds])
        method_name = method_to_actual_name.get(method_name, method_name)
        if method_name not in color_map:
            color_map[method_name] = clrs[len(color_map)]
        color = color_map[method_name]
        ax.plot(
            x_vals,
            means,
            c=color,
            zorder=1,
        )
        ax.scatter(
            x_vals,
            means,
            s=50,
            label=method_name,
            color=color,
            zorder=2,
            marker='x' if "ours" in method_name else ".",
        )
        ax.fill_between(
            x_vals,
            means - stds,
            means + stds,
            alpha=0.15,
            facecolor=color,
        )
        ax.set_xlabel(
            f"Concept Groups{' Incorrectly' if adversarial else ''} Intervened"
            if dataset_name == "CUB" else f"Concepts{' Incorrectly' if adversarial else ''} Intervened",
            fontsize=13,
        )
        ax.set_title(dataset_name, fontsize=18)
        ax.grid(False)
        
axs[0].set_ylabel("Task Accuracy (%)", fontsize=13)
handles, labels = ax.get_legend_handles_labels()
lgd = fig.legend(
    handles,
    labels,
    fontsize=14,
    markerscale=2,
    loc='upper center',
    bbox_to_anchor=(0.5,-0.001),
    ncol=5, #5,
)
plt.savefig(
    'interventions_complete_with_sequential_and_ind.pdf',
    bbox_extra_artists=(lgd,),
    bbox_inches='tight',
)
plt.show()

# %% [code]
method_to_actual_name = {
    'ConceptBottleneckModelBool': 'Bool-CBM',
    'ConceptBottleneckModelFuzzy': 'Fuzzy-CBM',
    'ConceptBottleneckModelFuzzyExtraCapacity_Logit': 'Hybrid-CBM',
    'MixtureEmbModelSharedProb_AdaptiveDropout_NoProbConcat': "CEM (ours)",
    'MixtureEmbModelSharedProb_Adaptive_NoProbConcat': "CEM without RandInt (ours)",
}

fig, axs = plt.subplots(1, 4, figsize=(16, 3))

for ax, (dataset_name, y_vals, x_vals, adversarial) in zip(axs, [
    ("CUB", cub_int_results, cub_groups, False),
    ("CelebA", celeba_int_results, np.arange(len(celeba_int_results)), False),
    ("CUB", cub_adversarial_int_results, cub_groups, True),
    ("CelebA", celeba_adversarial_int_results, np.arange(len(celeba_int_results)), True),
]):
    y_acc_means = [
        {
            method: np.mean(vals)
            for method, vals in results.items()
        } for results in y_vals
    ]
    y_acc_stds = [
        {
            method: np.std(vals)
            for method, vals in results.items()
        } for results in y_vals
    ]
    method_names = list(y_acc_means[-1].keys())
    print(y_acc_means[-1])


    for method_name in sorted(method_names):
        print(method_name)
        if method_name not in method_to_actual_name:
            continue
        means = np.array([item[method_name] * 100 for item in y_acc_means])
        stds = np.array([item[method_name] * 100 for item in y_acc_stds])
        method_name = method_to_actual_name.get(method_name, method_name)
        if method_name not in color_map:
            color_map[method_name] = clrs[len(color_map)]
        color = color_map[method_name]
        ax.plot(
            x_vals,
            means,
            c=color,
            zorder=1,
        )
        ax.scatter(
            x_vals,
            means,
            s=50,
            label=method_name,
            color=color,
            zorder=2,
            marker='x' if "ours" in method_name else ".",
        )
        ax.fill_between(
            x_vals,
            means - stds,
            means + stds,
            alpha=0.15,
            facecolor=color,
        )
        ax.set_xlabel(
            f"Concept Groups{' Incorrectly' if adversarial else ''} Intervened"
            if dataset_name == "CUB" else f"Concepts{' Incorrectly' if adversarial else ''} Intervened",
            fontsize=13,
        )
        ax.set_title(dataset_name, fontsize=18)
        ax.grid(False)

axs[0].set_ylabel("Task Accuracy (%)", fontsize=13)

handles, labels = ax.get_legend_handles_labels()
lgd = fig.legend(
    handles,
    labels,
    fontsize=14,
    markerscale=2,
    loc='upper center',
    bbox_to_anchor=(0.5,-0.001),
    ncol=5,
)
plt.savefig(
    'interventions_complete_with_adversarial.pdf',
    bbox_extra_artists=(lgd,),
    bbox_inches='tight',
)
plt.show()

# %% [markdown]
# RandInt Ablation Results

# %% [code]
from collections import defaultdict

cub_prob_ablation_results = load(
    os.path.join(
        RESULTS_DIR,
        "cub_randint_ablation/results.joblib",
    )
)
fig, axs = plt.subplots(1, 2, figsize=(12, 4))


metric = 'test_acc_y'
transform_fn = lambda x: 100 * x
y_model_means = defaultdict(list)
y_model_stds = defaultdict(list)
for sampling_percent, collected_results in cub_prob_ablation_results.items():
    for model_name, var_name in [
        ("CEM (ours)", "MixtureEmbModelSharedProb_AdaptiveDropout_NoProbConcat"),
    ]:
        key = f'{metric}_{var_name}_prob_{sampling_percent}'
        if key not in collected_results['0']:
            key = f'{metric}_{var_name}_{sampling_percent}'
        mean, std = get_mean_and_std(
            collected_results,
            key,
            transform_fn,
        )
        y_model_means[model_name].append(np.array(mean))
        y_model_stds[model_name].append(np.array(std))

ax = axs[0]
for i, (model_name, means) in enumerate(y_model_means.items()):
    stds = np.array(y_model_stds[model_name])
    print(stds)
    print(means)
    x_vals = list(map(lambda x: x*100, sorted(cub_prob_ablation_results.keys())))
    print(x_vals)
    print()
    if model_name not in color_map:
        color_map[model_name] = clrs[len(color_map)]
    color = color_map[model_name]
    ax.plot(
        x_vals,
        means,
        c=color,
        zorder=1,
    )
    ax.scatter(
        x_vals,
        means,
        s=50,
        label=model_name,
        color=color,
        zorder=2,
    )
    ax.fill_between(
        x_vals,
        means - stds,
        means + stds,
        alpha=0.3,
        facecolor=color,
    )
ax.set_xlabel("$p_{int}$ (%)", fontsize=16)
ax.set_ylabel("Task Accuracy (%)", fontsize=16)
xticks = np.arange(0, 110, 10)
ax.set_xticks(xticks)
ax.set_xticklabels(list(map(str, xticks)), fontsize=15)

yticks = np.arange(70, 82, 2)
ax.set_yticks(yticks)
ax.set_yticklabels(list(map(str, yticks)), fontsize=15)
ax.grid(False)
ax.set_ylim((np.min(yticks) - 1, np.max(yticks) + 1))
ax.set_title('CEM Task Performance (CUB)', fontsize=20)


metric = 'test_acc_c'
transform_fn = lambda x: 100 * x
y_model_means = defaultdict(list)
y_model_stds = defaultdict(list)
for sampling_percent, collected_results in cub_prob_ablation_results.items():
    for model_name, var_name in [
        ("CEM (ours)", "MixtureEmbModelSharedProb_AdaptiveDropout_NoProbConcat"),
    ]:
        key = f'{metric}_{var_name}_prob_{sampling_percent}'
        if key not in collected_results['0']:
            key = f'{metric}_{var_name}_{sampling_percent}'
        mean, std = get_mean_and_std(
            collected_results,
            key,
            transform_fn,
        )
        y_model_means[model_name].append(np.array(mean))
        y_model_stds[model_name].append(np.array(std))

ax = axs[1]
for i, (model_name, means) in enumerate(y_model_means.items()):
    stds = np.array(y_model_stds[model_name])
    print(stds)
    print(means)
    x_vals = list(map(lambda x: x*100, sorted(cub_prob_ablation_results.keys())))
    print(x_vals)
    print()
    if model_name not in color_map:
        color_map[model_name] = clrs[len(color_map)]
    color = color_map[model_name]
    ax.plot(
        x_vals,
        means,
        c=color,
        zorder=1,
    )
    ax.scatter(
        x_vals,
        means,
        s=50,
        label=model_name,
        color=color,
        zorder=2,
    )
    ax.fill_between(
        x_vals,
        means - stds,
        means + stds,
        alpha=0.3,
        facecolor=color,
    )
ax.set_xlabel("$p_{int}$ (%)", fontsize=16)
ax.set_ylabel("Mean Concept Accuracy (%)", fontsize=16)
xticks = np.arange(0, 110, 10)
ax.set_xticks(xticks)
ax.set_xticklabels(list(map(str, xticks)), fontsize=15)

yticks = np.arange(95, 97.2, 0.4)
ax.set_yticks(yticks)
ax.set_yticklabels(list(map(lambda x: f"{x:.1f}", yticks)), fontsize=15)
ax.grid(False)
ax.set_ylim((np.min(yticks) - 0.2, np.max(yticks) + 0.2))
ax.set_title('CEM Concept Performance (CUB)', fontsize=20)

plt.savefig(
    'prob_ablation_cub.pdf',
    bbox_inches='tight',
)
plt.show()

# %% [code]
cub_prob_ablation_intervention_results = load(
    os.path.join(
        RESULTS_DIR,
        "cub_intervention/prob_ablation_total_y_accs.joblib",
    )
)

probs = [0.0, 0.1, 0.2, 0.3, 0.4, 0.5, 0.6, 0.7, 0.8, 0.9, 0.99, 1.0]
intervention_percents = [0.25, 0.5, 0.75, 1.0]
print(probs)
int_acc_results_means = defaultdict(list)
int_acc_results_stds = defaultdict(list)
for prob in probs:
    model_name = f'MixtureEmbModelSharedProb_AdaptiveDropout_NoProbConcat_prob_{prob}'
    if model_name in cub_prob_ablation_intervention_results:
        vals = cub_prob_ablation_intervention_results[model_name][prob]
        for j, int_percent in enumerate(intervention_percents):
            int_acc_results_means[int_percent].append(
                np.mean(
                    [vals[k] for k in range(j, len(vals), len(intervention_percents))]
                )
            )
            int_acc_results_stds[int_percent].append(
                np.std(
                    [vals[k] for k in range(j, len(vals), len(intervention_percents))]
                )
            )
            

fig, ax = plt.subplots(1, 1, figsize=(6, 4))
clrs = sns.color_palette("colorblind", 30)
model_name = 'MixtureEmbModelSharedProb_AdaptiveDropout_NoProbConcat'
for i, int_percent in enumerate(intervention_percents):
    color = clrs[i * 2]
    means = 100*np.array(int_acc_results_means[int_percent])
    stds = 100*np.array(int_acc_results_stds[int_percent])
    x_vals = list(map(lambda x: x*100, probs))
    ax.plot(
        x_vals,
        means,
        c=color,
        zorder=1,
    )
    ax.scatter(
        x_vals,
        means,
        s=50,
        label=f'{int(int_percent * 100)}% Concept Groups Intervened',
        color=color,
        zorder=2,
    )
    ax.fill_between(
        x_vals,
        means - stds,
        means + stds,
        alpha=0.3,
        facecolor=color,
    )
    ax.set_xlabel("$p_{int}$ (%)", fontsize=16)
    ax.set_ylabel("Task Accuracy (%)", fontsize=16)
    xticks = np.arange(0, 110, 10)
    ax.set_xticks(xticks)
    ax.set_xticklabels(list(map(str, xticks)), fontsize=14)

    yticks = np.arange(80, 104, 4)
    ax.set_yticks(yticks)
    ax.set_ylim((np.min(yticks) - 2, np.max(yticks) + 2))
    ax.set_yticklabels(list(map(str, yticks)), fontsize=14)
    ax.grid(False)
    ax.set_title('CEM Intervention Task Performance (CUB)', fontsize=17)

handles, labels = ax.get_legend_handles_labels()
lgd = fig.legend(
    handles,
    labels,
    fontsize=14,
    markerscale=2,
    loc='upper center',
    bbox_to_anchor=(0.5,-0.001),
    ncol=2,
)

plt.savefig(
    'mixem_prob_ablation_study_interventions_cub.pdf',
    bbox_inches='tight',
)
plt.show()

# %% [markdown]
# Embedding Size Ablation Results

# %% [code]
from collections import defaultdict

cub_emb_ablation_results = load(
    os.path.join(
        RESULTS_DIR,
        "cub_emb_size_ablation/results.joblib",
    )
)
fig, axs = plt.subplots(1, 2, figsize=(12, 4))


metric = 'test_acc_y'
transform_fn = lambda x: 100 * x
y_model_means = defaultdict(list)
y_model_stds = defaultdict(list)
for emb_size, collected_results in cub_emb_ablation_results.items():
    for model_name, var_name in [
        ("CEM (ours)", "MixtureEmbModelSharedProb_AdaptiveDropout_NoProbConcat"),
        ("No Concepts", "ConceptBottleneckModelNoConceptSupervisionReLU_ExtraCapacity"),
        ("Hybrid-CBM", HYBRID_MODEL_REAL_WORLD),
    ]:
        key = f'{metric}_{var_name}_emb_size_{emb_size}'
        if key not in collected_results['0']:
            key = f'{metric}_{var_name}_{emb_size}'
        mean, std = get_mean_and_std(
            collected_results,
            key,
            transform_fn,
        )
        y_model_means[model_name].append(np.array(mean))
        y_model_stds[model_name].append(np.array(std))

ax = axs[0]
for i, (model_name, means) in enumerate(y_model_means.items()):
    stds = np.array(y_model_stds[model_name])
    stds = stds[:-1]
    means = means[:-1]
    print(stds)
    print(means)
    x_vals = list(map(lambda x: x, sorted(cub_emb_ablation_results.keys())))[:-1]
    print(x_vals)
    print()
    if model_name not in color_map:
        color_map[model_name] = clrs[len(color_map)]
    color = color_map[model_name]
    ax.plot(
        x_vals,
        means,
        c=color,
        zorder=1,
    )
    ax.scatter(
        x_vals,
        means,
        s=50,
        label=model_name,
        color=color,
        zorder=2,
    )
    ax.fill_between(
        x_vals,
        means - stds,
        means + stds,
        alpha=0.3,
        facecolor=color,
    )
ax.set_xlabel("Embedding Size", fontsize=16)
ax.set_ylabel("Task Accuracy (%)", fontsize=16)
xticks = np.arange(0, np.max(x_vals) + 2, 4)
ax.set_xticks(xticks)
ax.set_xticklabels(list(map(str, xticks)), fontsize=15)

yticks = np.arange(70, 80, 1)
ax.set_ylim((np.min(yticks) - 1, np.max(yticks) + 1))
ax.set_yticks(yticks)
ax.set_yticklabels(list(map(str, yticks)), fontsize=15)
ax.grid(False)
ax.set_title('CEM Task Performance (25% CUB)', fontsize=20)

handles, labels = ax.get_legend_handles_labels()


metric = 'test_acc_c'
transform_fn = lambda x: 100 * x
y_model_means = defaultdict(list)
y_model_stds = defaultdict(list)
for emb_size, collected_results in cub_emb_ablation_results.items():
    for model_name, var_name in [
        ("CEM (ours)", "MixtureEmbModelSharedProb_AdaptiveDropout_NoProbConcat"),
        ("Hybrid-CBM", HYBRID_MODEL_REAL_WORLD),
    ]:
        key = f'{metric}_{var_name}_emb_size_{emb_size}'
        if key not in collected_results['0']:
            key = f'{metric}_{var_name}_{emb_size}'
        mean, std = get_mean_and_std(
            collected_results,
            key,
            transform_fn,
        )
        y_model_means[model_name].append(np.array(mean))
        y_model_stds[model_name].append(np.array(std))

ax = axs[1]
for i, (model_name, means) in enumerate(y_model_means.items()):
    stds = np.array(y_model_stds[model_name])
    stds = stds[:-1]
    means = means[:-1]
    print(stds)
    print(means)
    x_vals = list(map(lambda x: x, sorted(cub_emb_ablation_results.keys())))[:-1]
    print(x_vals)
    print()
    if model_name not in color_map:
        color_map[model_name] = clrs[len(color_map)]
    color = color_map[model_name]
    ax.plot(
        x_vals,
        means,
        c=color,
        zorder=1,
    )
    ax.scatter(
        x_vals,
        means,
        s=50,
        label=model_name,
        color=color,
        zorder=2,
    )
    ax.fill_between(
        x_vals,
        means - stds,
        means + stds,
        alpha=0.3,
        facecolor=color,
    )
ax.set_xlabel("Embedding Size", fontsize=16)
ax.set_ylabel("Mean Concept Accuracy (%)", fontsize=16)
xticks = np.arange(0, np.max(x_vals) + 2, 4)
ax.set_xticks(xticks)
ax.set_xticklabels(list(map(str, xticks)), fontsize=15)

yticks = np.arange(95, 97, 0.25)
ax.set_ylim((np.min(yticks) - 0.2, np.max(yticks) + 0.2))
ax.set_yticks(yticks)
ax.set_yticklabels(list(map(lambda x: f"{x:.1f}", yticks)), fontsize=15)
ax.grid(False)
ax.set_title('CEM Concept Performance (25% CUB)', fontsize=20)


lgd = fig.legend(
    handles,
    labels,
    fontsize=18,
    markerscale=2,
    loc='upper center',
    bbox_to_anchor=(0.5,-0.001),
    ncol=5,
)
plt.savefig(
    'cub_emb_ablation_study.pdf',
    bbox_extra_artists=(lgd,),
    bbox_inches='tight',
)

plt.show()

# %% [code]
cub_emb_ablation_intervention_results = load(
    os.path.join(
        RESULTS_DIR,
        "cub_intervention/emb_ablation_total_y_accs.joblib",
    )
)

emb_sizes = list(map(lambda x: x, sorted(cub_emb_ablation_results.keys())))
intervention_percents = [0.0, 0.25, 0.5, 0.75, 1.0]
print(emb_sizes)
int_acc_results_means = defaultdict(list)
int_acc_results_stds = defaultdict(list)
for emb_size in emb_sizes:
    model_name = f'MixtureEmbModelSharedProb_AdaptiveDropout_NoProbConcat_emb_size_{emb_size}'
    if model_name in cub_emb_ablation_intervention_results:
        vals = cub_emb_ablation_intervention_results[model_name][emb_size]
        print((model_name, emb_size), vals)
        for j, int_percent in enumerate(intervention_percents):
            int_acc_results_means[int_percent].append(
                np.mean(
                    [vals[k] for k in range(j, len(vals), len(intervention_percents))]
                )
            )
            int_acc_results_stds[int_percent].append(
                np.std(
                    [vals[k] for k in range(j, len(vals), len(intervention_percents))]
                )
            )
            

fig, ax = plt.subplots(1, 1, figsize=(6, 4))
clrs = sns.color_palette("pastel", 30)
model_name = 'MixtureEmbModelSharedProb_AdaptiveDropout_NoProbConcat'
for i, int_percent in enumerate(intervention_percents):
    color = clrs[i]
    means = 100*np.array(int_acc_results_means[int_percent])
    stds = 100*np.array(int_acc_results_stds[int_percent])
    x_vals = emb_sizes[:-1]
    ax.plot(
        x_vals,
        means,
        c=color,
        zorder=1,
    )
    ax.scatter(
        x_vals,
        means,
        s=50,
        label=f'{int(int_percent * 100)}% Concept Groups Intervened',
        color=color,
        zorder=2,
    )
    ax.fill_between(
        x_vals,
        means - stds,
        means + stds,
        alpha=0.3,
        facecolor=color,
    )
    ax.set_xlabel("Embedding Size", fontsize=16)
    ax.set_ylabel("Task Accuracy (%)", fontsize=16)
    xticks = np.arange(0, np.max(emb_sizes[:-1]) + 3, 4)
    ax.set_xticks(xticks)
    ax.set_xticklabels(list(map(str, xticks)), fontsize=14)

    yticks = np.arange(70, 102, 5)
    ax.set_yticks(yticks)
    ax.set_ylim((np.min(yticks) - 5, np.max(yticks) + 5))
    ax.set_yticklabels(list(map(str, yticks)), fontsize=14)
    ax.grid(False)
    ax.set_title('CEM Interventions (25% CUB)', fontsize=17)

handles, labels = ax.get_legend_handles_labels()
lgd = fig.legend(
    handles,
    labels,
    fontsize=14,
    markerscale=2,
    loc='upper center',
    bbox_to_anchor=(0.5,-0.001),
    ncol=2,
)
plt.savefig(
    'cub_emb_ablation_intervention_study.pdf',
    bbox_extra_artists=(lgd,),
    bbox_inches='tight',
)

plt.show()

# %% [code]
from collections import defaultdict

celeba_emb_ablation_results = load(
    os.path.join(
        'results/celeba_emb_size_ablation',
        "results.joblib",
    )
)
fig, axs = plt.subplots(1, 2, figsize=(12, 4))


metric = 'test_acc_y'
transform_fn = lambda x: 100 * x
y_model_means = defaultdict(list)
y_model_stds = defaultdict(list)
for emb_size, collected_results in celeba_emb_ablation_results.items():
    for model_name, var_name in [
        ("CEM (ours)", "MixtureEmbModelSharedProb_AdaptiveDropout_NoProbConcat"),
        ("No Concepts", "ConceptBottleneckModelNoConceptSupervisionReLU_ExtraCapacity"),
        ("Hybrid-CBM", HYBRID_MODEL_REAL_WORLD),
    ]:
        key = f'{metric}_{var_name}_emb_size_{emb_size}'
        if key not in collected_results['0']:
            key = f'{metric}_{var_name}_{emb_size}'
        mean, std = get_mean_and_std(
            collected_results,
            key,
            transform_fn,
        )
        y_model_means[model_name].append(np.array(mean))
        y_model_stds[model_name].append(np.array(std))

ax = axs[0]
for i, (model_name, means) in enumerate(y_model_means.items()):
    stds = np.array(y_model_stds[model_name])
    stds = stds[:-1]
    means = means[:-1]
    print(stds)
    print(means)
    x_vals = list(map(lambda x: x, sorted(celeba_emb_ablation_results.keys())))[:-1]
    print(x_vals)
    print()
    if model_name not in color_map:
        color_map[model_name] = clrs[len(color_map)]
    color = color_map[model_name]
    ax.plot(
        x_vals,
        means,
        c=color,
        zorder=1,
    )
    ax.scatter(
        x_vals,
        means,
        s=50,
        label=model_name,
        color=color,
        zorder=2,
    )
    ax.fill_between(
        x_vals,
        means - stds,
        means + stds,
        alpha=0.3,
        facecolor=color,
    )
ax.set_xlabel("Embedding Size", fontsize=16)
ax.set_ylabel("Task Accuracy (%)", fontsize=16)
xticks = np.arange(0, np.max(x_vals) + 2, 4)
ax.set_xticks(xticks)
ax.set_xticklabels(list(map(str, xticks)), fontsize=15)

yticks = np.arange(15, 36, 5)
ax.set_ylim((np.min(yticks) - 1, np.max(yticks) + 1))
ax.set_yticks(yticks)
ax.set_yticklabels(list(map(str, yticks)), fontsize=15)
ax.grid(False)
ax.set_title('CEM Task Performance (CelebA)', fontsize=20)

handles, labels = ax.get_legend_handles_labels()


metric = 'test_acc_c'
transform_fn = lambda x: 100 * x
y_model_means = defaultdict(list)
y_model_stds = defaultdict(list)
for emb_size, collected_results in celeba_emb_ablation_results.items():
    for model_name, var_name in [
        ("CEM (ours)", "MixtureEmbModelSharedProb_AdaptiveDropout_NoProbConcat"),
        ("Hybrid-CBM", HYBRID_MODEL_REAL_WORLD),
    ]:
        key = f'{metric}_{var_name}_emb_size_{emb_size}'
        if key not in collected_results['0']:
            key = f'{metric}_{var_name}_{emb_size}'
        mean, std = get_mean_and_std(
            collected_results,
            key,
            transform_fn,
        )
        y_model_means[model_name].append(np.array(mean))
        y_model_stds[model_name].append(np.array(std))

ax = axs[1]
for i, (model_name, means) in enumerate(y_model_means.items()):
    stds = np.array(y_model_stds[model_name])
    stds = stds[:-1]
    means = means[:-1]
    print(stds)
    print(means)
    x_vals = list(map(lambda x: x, sorted(celeba_emb_ablation_results.keys())))[:-1]
    print(x_vals)
    print()
    if model_name not in color_map:
        color_map[model_name] = clrs[len(color_map)]
    color = color_map[model_name]
    ax.plot(
        x_vals,
        means,
        c=color,
        zorder=1,
    )
    ax.scatter(
        x_vals,
        means,
        s=50,
        label=model_name,
        color=color,
        zorder=2,
    )
    ax.fill_between(
        x_vals,
        means - stds,
        means + stds,
        alpha=0.3,
        facecolor=color,
    )
ax.set_xlabel("Embedding Size", fontsize=16)
ax.set_ylabel("Mean Concept Accuracy (%)", fontsize=16)
xticks = np.arange(0, np.max(x_vals) + 2, 4)
ax.set_xticks(xticks)
ax.set_xticklabels(list(map(str, xticks)), fontsize=15)

yticks = np.arange(82, 87, 1)
ax.set_ylim((np.min(yticks) - 1, np.max(yticks) + 1))
ax.set_yticks(yticks)
ax.set_yticklabels(list(map(lambda x: f"{x}", yticks)), fontsize=15)
ax.grid(False)
ax.set_title('CEM Concept Performance (CelebA)', fontsize=20)


lgd = fig.legend(
    handles,
    labels,
    fontsize=18,
    markerscale=2,
    loc='upper center',
    bbox_to_anchor=(0.5,-0.001),
    ncol=5,
)
plt.savefig(
    'celeba_emb_ablation_study.pdf',
    bbox_extra_artists=(lgd,),
    bbox_inches='tight',
)

plt.show()

# %% [code]
celeba_emb_ablation_intervention_results = load(
    os.path.join(
        RESULTS_DIR,
        "celeba_bin_intervention/emb_ablation_total_y_accs.joblib",
    )
)
emb_sizes = list(map(lambda x: x, sorted(celeba_emb_ablation_results.keys())))[:-1]
intervention_percents = [0.0, 0.25, 0.5, 0.75, 1.0]
print(emb_sizes)
int_acc_results_means = defaultdict(list)
int_acc_results_stds = defaultdict(list)
for emb_size in emb_sizes:
    model_name = f'MixtureEmbModelSharedProb_AdaptiveDropout_NoProbConcat_emb_size_{emb_size}'
    if model_name in celeba_emb_ablation_intervention_results:
        vals = celeba_emb_ablation_intervention_results[model_name][emb_size]
        print((model_name, emb_size), vals)
        for j, int_percent in enumerate(intervention_percents):
            int_acc_results_means[int_percent].append(
                np.mean(
                    [vals[k] for k in range(j, len(vals), len(intervention_percents))]
                )
            )
            int_acc_results_stds[int_percent].append(
                np.std(
                    [vals[k] for k in range(j, len(vals), len(intervention_percents))]
                )
            )
            

fig, ax = plt.subplots(1, 1, figsize=(6, 4))
clrs = sns.color_palette("pastel", 30)
model_name = 'MixtureEmbModelSharedProb_AdaptiveDropout_NoProbConcat'
for i, int_percent in enumerate(intervention_percents):
    color = clrs[i]
    means = 100*np.array(int_acc_results_means[int_percent])
    stds = 100*np.array(int_acc_results_stds[int_percent])
    x_vals = emb_sizes
    ax.plot(
        x_vals,
        means,
        c=color,
        zorder=1,
    )
    ax.scatter(
        x_vals,
        means,
        s=50,
        label=f'{int(int_percent * 100)}% Concepts Intervened',
        color=color,
        zorder=2,
    )
    ax.fill_between(
        x_vals,
        means - stds,
        means + stds,
        alpha=0.3,
        facecolor=color,
    )
    ax.set_xlabel("Embedding Size", fontsize=16)
    ax.set_ylabel("Task Accuracy (%)", fontsize=16)
    xticks = np.arange(0, np.max(emb_sizes) + 3, 4)
    ax.set_xticks(xticks)
    ax.set_xticklabels(list(map(str, xticks)), fontsize=14)

    yticks = np.arange(25, 55, 5)
    ax.set_yticks(yticks)
    ax.set_ylim((np.min(yticks) - 2, np.max(yticks) + 2))
    ax.set_yticklabels(list(map(str, yticks)), fontsize=14)
    ax.grid(False)
    ax.set_title('CEM Interventions (CelebA)', fontsize=17)

handles, labels = ax.get_legend_handles_labels()
lgd = fig.legend(
    handles,
    labels,
    fontsize=14,
    markerscale=2,
    loc='upper center',
    bbox_to_anchor=(0.5,-0.001),
    ncol=2,
)

plt.savefig(
    'celeba_emb_ablation_intervention_study.pdf',
    bbox_extra_artists=(lgd,),
    bbox_inches='tight',
)


plt.show()
