# Supplementary material
Source: ML conference proceedings conference paper supplement (https://proceedings.neurips.cc/paper_files/paper/2022/hash/867c06823281e506e8059f5c13a57f75-Abstract.html)
Supplement: Supplementary file 1 [file 867c06823281e506e8059f5c13a57f75-Supplemental-Conference.zip › SupplementaryMaterial/code/core/utils.py]

import sklearn
import numpy as np
import torch
import pytorch_lightning as pl

################################################################################
## HELPER FUNCTIONS
################################################################################


def _to_val(x):
    if len(x) >= 2 and (x[0] == "[") and (x[-1] == "]"):
        vals = list(map(lambda x: x.strip(), x[1:-1].split(",")))
        return list(map(_to_val, vals))
    try:
        return int(x)
    except ValueError:
        # Then this is not an int
        pass

    try:
        return float(x)
    except ValueError:
        # Then this is not an float
        pass

    if x.lower() in ["true"]:
        return True
    if x.lower() in ["false"]:
        return False

    return x


def extend_with_global_params(config, global_params):
    for param_path, value in global_params:
        var_names = list(map(lambda x: x.strip(), param_path.split(".")))
        current_obj = config
        for path_entry in var_names[:-1]:
            if path_entry not in config:
                current_obj[path_entry] = {}
            current_obj = current_obj[path_entry]
        current_obj[var_names[-1]] = _to_val(value)


def compute_bin_accuracy(y_pred, y_true):
    y_probs = y_pred.reshape(-1).cpu().detach()
    y_pred = y_probs > 0.5
    y_true = y_true.reshape(-1).cpu().detach()
    y_accuracy = sklearn.metrics.accuracy_score(y_true, y_pred)
    try:
        y_auc = sklearn.metrics.roc_auc_score(
            y_true,
            y_probs,
            multi_class='ovo',
        )
    except:
        y_auc = 0
    try:
        y_f1 = sklearn.metrics.f1_score(y_true, y_pred, average='macro')
    except:
        y_f1 = 0
    return (y_accuracy, y_auc, y_f1)


def compute_accuracy(
    y_pred,
    y_true,
    binary_output=False,
):
    if (len(y_pred.shape) < 2) or (y_pred.shape[-1] == 1) or binary_output:
        return compute_bin_accuracy(
            y_pred=y_pred,
            y_true=y_true,
        )
    y_probs = torch.nn.Softmax(dim=-1)(y_pred).cpu().detach()
    used_classes = np.unique(y_true.reshape(-1).cpu().detach())
    y_probs = y_probs[:, sorted(list(used_classes))]
    y_pred = y_pred.argmax(dim=-1).cpu().detach()
    y_true = y_true.reshape(-1).cpu().detach()
    y_accuracy = sklearn.metrics.accuracy_score(y_true, y_pred)
    try:
        y_auc = sklearn.metrics.roc_auc_score(
            y_true,
            y_probs,
            multi_class='ovo',
        )
    except:
        y_auc = 0.0
    y_f1 = 0.0
    return (y_accuracy, y_auc, y_f1)


################################################################################
## HELPER CLASSES
################################################################################

class EmptyEnter(object):
    def __init__(self):
        pass

    def __enter__(self, *args, **kwargs):
        return None

    def __exit__(self, *args, **kwargs):
        pass


class ActivationMonitorWrapper:
    def __init__(
        self,
        model,
        trainer,
        activation_freq,
        single_frequency_epochs,
        output_dir,
        test_dl,
        **kwargs
    ):
        super().__init__(
            **kwargs,
        )
        self.activation_freq = activation_freq
        self.single_frequency_epochs = single_frequency_epochs
        self.output_dir = output_dir
        self.test_dl = test_dl
        Path(output_dir).mkdir(parents=True, exist_ok=True)
        self.epoch = 0
        self.trainer = trainer
        self.model = model

    def fit(self, *args, **kwargs):
        if self.epoch == 0:
            self.dump_activations()
        true_max_epochs = self.trainer.max_epochs
        while self.epoch < true_max_epochs:
            if self.epoch < self.single_frequency_epochs:
                next_size = 1
            else:
                next_size = min(
                    true_max_epochs - self.epoch,
                    self.activation_freq,
                )
            self.trainer.fit_loop.max_epochs = next_size + self.epoch
            self.trainer.fit_loop.current_epoch = self.epoch
            self.trainer.fit(*args, **kwargs)
            self.epoch += next_size
            self.dump_activations()

    def dump_activations(self):
        batch_results = self.trainer.predict(self.model, self.test_dl)
        out_semantics = np.concatenate(
            list(map(lambda x: x[0], batch_results)),
            axis=0,
        )
        out_embs = np.concatenate(
            list(map(lambda x: x[1], batch_results)),
            axis=0,
        )

        out_acts = np.concatenate(
            list(map(lambda x: x[2], batch_results)),
            axis=0,
        )
        np.save(
            os.path.join(
                self.output_dir,
                f'test_embedding_semantics_on_epoch_{self.epoch}.npy',
            ),
            out_semantics,
        )
        np.save(
            os.path.join(
                self.output_dir,
                f'test_embedding_vectors_on_epoch_{self.epoch}.npy',
            ),
            out_embs,
        )
        np.save(
            os.path.join(
                self.output_dir,
                f'test_model_output_on_epoch_{self.epoch}.npy',
            ),
            out_acts,
        )


class WrapperModule(pl.LightningModule):
    def __init__(
        self,
        model,
        n_tasks,
        momentum=0.9,
        learning_rate=0.01,
        weight_decay=4e-05,
        optimizer="sgd",
        top_k_accuracy=2,
        binary_output=False,
        weight_loss=None,
        sigmoidal_output=False,
    ):
        super().__init__()
        self.n_tasks = n_tasks
        self.binary_output = binary_output
        self.model = model
        if self.n_tasks > 1 and (not binary_output):
            self.loss_task = torch.nn.CrossEntropyLoss(weight=weight_loss)
        elif not sigmoidal_output:
            self.loss_task = torch.nn.BCEWithLogitsLoss(weight=weight_loss)
        else:
            self.loss_task = torch.nn.BCELoss(weight=weight_loss)
        self.momentum = momentum
        self.learning_rate = learning_rate
        self.optimizer_name = optimizer
        self.weight_decay = weight_decay
        self.top_k_accuracy = top_k_accuracy
        if sigmoidal_output:
            self.sig = torch.nn.Sigmoid()
            self.acc_sig = lambda x: x
        else:
            # Then we assume the model already outputs a sigmoidal vector
            self.sig = lambda x: x
            self.acc_sig = (
                torch.nn.Sigmoid() if self.binary_output else lambda x: x
            )

    def forward(self, x):
        return self.sig(self.model(x))

    def predict_step(self, batch, batch_idx, dataloader_idx=0):
        x, y = batch
        return self(x)

    def _run_step(self, batch, batch_idx, train=False):
        x, y = batch
        y_logits = self(x)
        loss = self.loss_task(
            y_logits if y_logits.shape[-1] > 1 else y_logits.reshape(-1),
            y,
        )
        # compute accuracy
        (y_accuracy, y_auc, y_f1) = compute_accuracy(
            y_true=y,
            y_pred=self.acc_sig(y_logits),
            binary_output=self.binary_output,
        )

        result = {
            "y_accuracy": y_accuracy,
            "y_auc": y_auc,
            "y_f1": y_f1,
            "loss": loss.detach(),
        }
        if (self.top_k_accuracy is not None) and (self.n_tasks > 2) and (
            not self.binary_output
        ):
            y_true = y.reshape(-1).cpu().detach()
            y_pred = y_logits.cpu().detach()
            labels = list(range(self.n_tasks))
            for top_k_val in self.top_k_accuracy:
                y_top_k_accuracy = sklearn.metrics.top_k_accuracy_score(
                    y_true,
                    y_pred,
                    k=top_k_val,
                    labels=labels,
                )
                result[f'y_top_{top_k_val}_accuracy'] = y_top_k_accuracy
        return loss, result

    def training_step(self, batch, batch_no):
        loss, result = self._run_step(batch, batch_no, train=True)
        for name, val in result.items():
            self.log(name, val, prog_bar=("accuracy" in name))
        return {
            "loss": loss,
            "log": {
                "y_accuracy": result['y_accuracy'],
                "y_auc": result['y_auc'],
                "y_f1": result['y_f1'],
                "loss": result['loss'],
            },
        }

    def validation_step(self, batch, batch_no):
        loss, result = self._run_step(batch, batch_no, train=False)
        for name, val in result.items():
            self.log("val_" + name, val, prog_bar=("accuracy" in name))
        return {
            "val_" + key: val
            for key, val in result.items()
        }

    def test_step(self, batch, batch_no):
        loss, result = self._run_step(batch, batch_no, train=False)
        for name, val in result.items():
            self.log("test_" + name, val, prog_bar=True)
        return result['loss']

    def configure_optimizers(self):
        if self.optimizer_name.lower() == "adam":
            optimizer = torch.optim.Adam(
                self.parameters(),
                lr=self.learning_rate,
                weight_decay=self.weight_decay,
            )
        else:
            optimizer = torch.optim.SGD(
                filter(lambda p: p.requires_grad, self.parameters()),
                lr=self.learning_rate,
                momentum=self.momentum,
                weight_decay=self.weight_decay,
            )
        lr_scheduler = torch.optim.lr_scheduler.ReduceLROnPlateau(optimizer)
        return {
            "optimizer": optimizer,
            "lr_scheduler": lr_scheduler,
            "monitor": "loss",
        }
