# Supplementary material
Source: ML conference proceedings conference paper supplement (https://proceedings.neurips.cc/paper_files/paper/2022/hash/867c06823281e506e8059f5c13a57f75-Abstract.html)
Supplement: Supplementary file 1 [file 867c06823281e506e8059f5c13a57f75-Supplemental-Conference.zip › SupplementaryMaterial/code/mutual_information/plot_results.ipynb]

# %% [code]
import os

import numpy as np
import pandas as pd
import seaborn as sns
from matplotlib import pyplot as plt

######### DATASET MAPPINGS ########
dataset_mappings = {
    "xor": "XOR",
    "dot": "Dot",
    "trig": "Trigonometry",
    "cub": "CUB",
    "celeba": "CelebA"
}

ticks_mappings = {
    "xor": np.arange(0, 1.1, step=0.5),
    "dot": np.arange(0, 1.1, step=0.5),
    "trig": np.arange(0, 1.1, step=0.5),
    "cub": np.arange(0, 2.1, step=1),
    "celeba": np.arange(0, 5.1, step=2.5),
}
datasets = ["xor", "trig", "dot", "cub", "celeba"]
image_folder = "images"

# %% [code]
sns.set(style="whitegrid",rc={'figure.figsize': (18, 4)}, font_scale=1.8)
fig, axes = plt.subplots(1, 5)

for dataset, ax in zip(datasets, axes):
    df = pd.read_pickle(f"{dataset}_results.pkl")

    if dataset == "cub" or dataset == "celeba":
        from utils_cv import name_mappings, color_mappings, marker_mappings
    else:
        from utils import name_mappings, color_mappings, marker_mappings

    df_mean = df.groupby(["dataset", "method", "epoch"]).mean().reset_index()

    methods = []
    for i, row in df_mean.iterrows():
        methods.append(name_mappings[row['method']])
    df_mean['Methods'] = methods
    methods = np.unique(np.asarray(methods)).tolist()
    methods_before_mappings = np.unique(np.asarray(df_mean['method'])).tolist()
    print(methods)
    print(methods_before_mappings)

    palette = [color_mappings[method] for method in methods_before_mappings]
    markers = [marker_mappings[method] for method in methods_before_mappings]

    sns.scatterplot(data=df_mean, x="I(X,T)", y="I(T,Y)",
                         sizes=(30, 150),linewidth=0.000, edgecolor="black",
                         hue="Methods", style="Methods", palette=palette,
                         markers=markers, size="epoch", ax=ax)
    ax.legend().set_visible(False)
    for axis in ['top','bottom','left','right']:
        ax.spines[axis].set_linewidth(0.01)
        ax.spines[axis].set_color("lightgray")
    if dataset == "xor":
        ax.set_ylabel("$I(\hat{C}, Y)$", fontsize=24)
    else:
        ax.set_ylabel("")
    ax.set_yticks(ticks_mappings[dataset])
    ax.set_xlabel("$I(X, \hat{C})$", fontsize=24)
    ax.set_title(dataset_mappings[dataset], fontsize=36, pad=10)

handles, labels = ax.get_legend_handles_labels()
handles_sorted = [handles[4], handles[1], handles[2], handles[3], handles[5]]
labels_sorted = [labels[4], labels[1], labels[2], labels[3], labels[5]]
lgd = fig.legend(handles_sorted, labels_sorted,markerscale=2, fontsize=22, loc='upper center',
                 bbox_to_anchor=(0.5, 0.1), ncol=len(datasets), frameon=False)
plt.tight_layout()
plt.show()

# %% [code]

ticks_mappings2 = {
    "xor": np.arange(0, 1.1, step=0.5),
    "dot": np.arange(0, 1.1, step=0.5),
    "trig": np.arange(0, 1.1, step=0.5),
    "cub": np.arange(0, .11, step=.05),
    "celeba": np.arange(0, 1.1, step=.5),
}
fig2, axes2 = plt.subplots(1, 5)

for dataset, ax2 in zip(datasets, axes2):
    df = pd.read_pickle(f"{dataset}_results.pkl")

    if dataset == "cub" or dataset == "celeba":
        from utils_cv import name_mappings, color_mappings, marker_mappings
    else:
        from utils import name_mappings, color_mappings, marker_mappings


    df_mean = df.groupby(["dataset", "method", "epoch"]).mean().reset_index()

    methods = []
    for i, row in df_mean.iterrows():
        methods.append(name_mappings[row['method']])
    df_mean['Methods'] = methods
    methods = np.unique(np.asarray(methods)).tolist()
    methods_before_mappings = np.unique(np.asarray(df_mean['method'])).tolist()
    print(methods)
    print(methods_before_mappings)

    palette = [color_mappings[method] for method in methods_before_mappings]
    markers = [marker_mappings[method] for method in methods_before_mappings]

    sns.scatterplot(data=df_mean, x="I(X,T)", y="I(T,C)",
                         sizes=(30, 150),linewidth=0.0000, edgecolor="black",
                         hue="Methods", style="Methods", palette=palette,
                         markers=markers, size="epoch", ax=ax2)
    ax2.legend().set_visible(False)
    for axis in ['top','bottom','left','right']:
        ax2.spines[axis].set_linewidth(0.01)
        ax2.spines[axis].set_color("lightgray")
    # sns.despine()
    if dataset == "xor":
        ax2.set_ylabel("$I(\hat{C}, Y)$", fontsize=24)
    else:
        ax2.set_ylabel("")
    ax2.set_yticks(ticks_mappings2[dataset])
    ax2.set_xlabel("$I(X, \hat{C})$", fontsize=24)
    ax2.set_title(dataset_mappings[dataset], fontsize=36, pad=10)

handles, labels = ax2.get_legend_handles_labels()
handles_sorted = [handles[4], handles[1], handles[2], handles[3], handles[5]]
labels_sorted = [labels[4], labels[1], labels[2], labels[3], labels[5]]
lgd = fig2.legend(handles_sorted, labels_sorted, fontsize=22, loc='upper center',
                 bbox_to_anchor=(0.5, 0.1), ncol=len(datasets), frameon=False, markerscale=2)
plt.tight_layout()
plt.show()
