# Supplementary material
Source: ML conference proceedings conference paper supplement (https://proceedings.neurips.cc/paper_files/paper/2022/hash/867c06823281e506e8059f5c13a57f75-Abstract.html)
Supplement: Supplementary file 1 [file 867c06823281e506e8059f5c13a57f75-Supplemental-Conference.zip › SupplementaryMaterial/code/mutual_information/xor_analysis.ipynb]

# %% [code]
import os

import numpy as np
import pandas as pd
import seaborn as sns
from matplotlib import pyplot as plt
from tqdm import tqdm

from mutual_information import mutual_information_T_Y, mutual_information_X_T, mutual_information_T_C
from utils import NO_CBM, CBM_bool, CBM_fuzzy, HYBRID, CEM, name_mappings, color_mappings,\
    marker_mappings

dataset = "xor"

image_folder = "images"
result_folder = "results"
xor_folder = "xor_results"
data_folder = os.path.join(result_folder, xor_folder)
output_file = "test_embedding_vectors_on_epoch"

methods = [NO_CBM, CBM_bool, CBM_fuzzy, HYBRID, CEM]

seeds = [*range(1, 6)]
epochs = [*range(100), *range(100, 1025, 25)]

# %% [code]
labels_c = np.load(os.path.join(data_folder, "c_test.npy"), allow_pickle=True)
labels_y = np.load(os.path.join(data_folder, "y_test.npy"), allow_pickle=True)

debug = True
metrics = []
for seed in seeds:
    for method in methods:
        folder_name = os.path.join(data_folder, f"{method}_fold_{seed}")
        for epoch in tqdm(epochs, desc=folder_name):

            file = os.path.join(folder_name, f"{output_file}_{epoch}.npy")
            output = np.load(file, allow_pickle=True)

            N = output.shape[1]
            noise_variance = np.log(N) / 100 if method != SplitEmbedding else np.log(N)/50

            MI_X_T, H_T, H_X_T = mutual_information_X_T(output,
                                                        return_H=True, noise_variance=noise_variance)
            MI_T_C, _, H_T_C  = mutual_information_T_C(output, labels_c, entropy_T=H_T,
                                                       return_H=True, noise_variance=noise_variance)
            MI_T_Y, _, H_T_Y = mutual_information_T_Y(output, labels_y, entropy_T=H_T,
                                                      return_H=True, noise_variance=noise_variance)

            epoch_metric = {
                "dataset": dataset,
                "method": method,
                "seed": seed,
                "epoch": epoch,
                "H(T)": H_T,
                "H(X|T)": H_X_T,
                "H(T|C)": H_T_C,
                "H(T|Y)": H_T_Y,
                "I(X,T)": MI_X_T,
                "I(T,C)": MI_T_C,
                "I(T,Y)": MI_T_Y,
            }
            metrics.append(epoch_metric)
            if debug == 2:
                print(f"\nH(T): {H_T:.2f}, H(X|T): {H_X_T:.2f}, H(T|C): {H_T_C:.2f}, "
                      f"H(T|Y): {H_T_Y:.2f}, I(X,T): {MI_X_T:.2f}, I(T,C): {MI_T_C:.2f}, "
                      f"I(T,Y): {MI_T_Y:.2f}")

        if debug and seed == 1:
            df = pd.DataFrame(metrics)
            ax = sns.scatterplot(data=df, x="I(X,T)", y="I(T,Y)", size="epoch", hue="method")
            ax.legend().set_visible(False)
            plt.show()
            ax = sns.scatterplot(data=df, x="I(X,T)", y="I(T,C)", size="epoch", hue="method")
            ax.legend().set_visible(False)
            plt.show()


df = pd.DataFrame(metrics)
df.to_pickle(f"{dataset}_results.pkl")

# %% [code]
df = pd.read_pickle(f"{dataset}_results.pkl")

if not os.path.isdir(image_folder):
    os.makedirs(image_folder)

df_mean = df.groupby(["dataset", "method", "epoch"]).mean().reset_index()

methods = []
for i, row in df_mean.iterrows():
    methods.append(name_mappings[row['method']])
df_mean['Methods'] = methods
methods = np.unique(np.asarray(methods)).tolist()
methods_before_mappings = np.unique(np.asarray(df_mean['method'])).tolist()
print(methods)
print(methods_before_mappings)
df_mean

# %% [code]
sns.set(style="white", rc={'figure.figsize': (6, 6)}, font_scale=1.5)
palette = [color_mappings[method] for method in methods_before_mappings]
markers = [marker_mappings[method] for method in methods_before_mappings]

ax = sns.scatterplot(data=df_mean, x="I(X,T)", y="I(T,Y)",
                     sizes=(30, 150),linewidth=0.0000, edgecolor="black",
                     hue="Methods", style="Methods", palette=palette,
                     markers=markers, size="epoch")
ax.legend().set_visible(False)
for axis in ['top','bottom','left','right']:
    ax.spines[axis].set_linewidth(0.01)
plt.ylabel("$I(\hat{C}, Y)$", fontsize=24)
plt.xlabel("$I(X, \hat{C})$", fontsize=24)
plt.title("XOR", fontsize=36)
plt.tight_layout()
plt.show()

ax = sns.scatterplot(data=df_mean, x="I(X,T)", y="I(T,C)",
                     sizes=(30, 150),linewidth=0.0000, edgecolor="black",
                     hue="Methods", style="Methods", palette=palette,
                     markers=markers, size="epoch")
ax.legend().set_visible(False)
for axis in ['top','bottom','left','right']:
    ax.spines[axis].set_linewidth(0.01)
plt.ylabel("$I(\hat{C}, C)$")
plt.xlabel("$I(X, \hat{C})$")
plt.title("XOR", fontsize=36)
plt.tight_layout()
plt.show()
